# Supplementary material for: Transcriptome Analysis of C. elegans Reveals Novel Targets for DON Cytotoxicity
Source: MDPI journal article supplement (doi:10.3390/toxins10070262), 2018-06-27
Supplement: s1 [file s1]

## Sheet: Supplementary Data 1
GeneID	Gene_length	Ce_1-Expression	Ce_2-Expression	Ce_1-RPKM	Ce_2-RPKM	log2 Ratio(Ce_2/Ce_1)	Up-Down-Regulation(Ce_2/Ce_1)	P-value	FDR	Description	KEGG Orthology	GO Component	GO Function	GO Process	Blast nr
F19G12.t1	81	0	14	0.01	15.5988	10.6072	Up	5.27524e-05	0.000413269	cdna:pseudogene chromosome:WBcel235:X:1433063:1433143:-1 gene:F19G12.t1 gene_biotype:pseudogene transcript_biotype:pseudogene	-	-	-	-	-
F11D11.3	1267	0	86	0.01	6.12591	9.25878	Up	5.54704e-27	1.78178e-25	cdna:known chromosome:WBcel235:V:18757916:18760285:-1 gene:F11D11.3 gene_biotype:protein_coding transcript_biotype:protein_coding	-	-	-	GO:0010259//multicellular organismal aging	gi|17559560|ref|NP_507662.1|/0/Protein F11D11.3 [Caenorhabditis elegans]
F52F10.4	2079	7	3525	0.298049	153.022	9.00397	Up	0	0	cdna:known chromosome:WBcel235:V:1542517:1545761:-1 gene:F52F10.4 gene_biotype:protein_coding transcript_biotype:protein_coding	K00680	GO:0031224//intrinsic to membrane	GO:0016746//transferase activity, transferring acyl groups	GO:0040009//regulation of growth rate	gi|17561256|ref|NP_503442.1|/0/Protein OAC-32 [Caenorhabditis elegans]
H23L24.5	1680	2	984	0.105382	52.8609	8.97043	Up	5.26782e-296	1.37543e-293	cdna:known chromosome:WBcel235:IV:8712413:8715027:-1 gene:H23L24.5 gene_biotype:protein_coding transcript_biotype:protein_coding	K07759	-	-	GO:0007059//chromosome segregation;GO:0022403;GO:0044238//primary metabolic process	gi|32566022|ref|NP_501496.2|/0/Protein PME-4 [Caenorhabditis elegans]
Y51B9A.8	507	2	626	0.349194	111.433	8.31794	Up	4.08264e-187	7.10652e-185	cdna:known chromosome:WBcel235:II:9398866:9399828:1 gene:Y51B9A.8 gene_biotype:protein_coding transcript_biotype:protein_coding	-	-	-	-	gi|17537333|ref|NP_496003.1|/2.94847e-97/Protein Y51B9A.8 [Caenorhabditis elegans]
ZC47.13	936	0	15	0.01	1.44632	7.17624	Up	2.6121e-05	0.000215245	cdna:known chromosome:WBcel235:III:1287299:1288523:-1 gene:ZC47.13 gene_biotype:protein_coding transcript_biotype:protein_coding	-	-	-	-	gi|133901760|ref|NP_001076654.1|/2.10338e-178/Protein FBXA-50, isoform a [Caenorhabditis elegans]
K11G9.1	1718	32	4068	1.64881	213.701	7.01802	Up	0	0	cdna:known chromosome:WBcel235:V:6676799:6679072:1 gene:K11G9.1 gene_biotype:protein_coding transcript_biotype:protein_coding	K03927;K01044	-	-	-	gi|17562530|ref|NP_504693.1|/0/Protein K11G9.1 [Caenorhabditis elegans]
F35E12.2	1287	0	18	0.01	1.26224	6.97985	Up	3.17126e-06	2.98001e-05	cdna:known chromosome:WBcel235:V:13722346:13724881:-1 gene:F35E12.2 gene_biotype:protein_coding transcript_biotype:protein_coding	-	-	-	-	gi|392921607|ref|NP_001256541.1|/0/Protein F35E12.2, isoform a [Caenorhabditis elegans]
T21E8.2	3792	5	564	0.11672	13.4233	6.84554	Up	1.1103e-162	1.79584e-160	cdna:known chromosome:WBcel235:X:10864969:10870237:-1 gene:T21E8.2 gene_biotype:protein_coding transcript_biotype:protein_coding	K02021;K05660	-	-	-	gi|71996809|ref|NP_509812.2|/0/Protein PGP-7 [Caenorhabditis elegans]
C07G3.2	648	15	1391	2.04909	193.732	6.56293	Up	0	0	cdna:known chromosome:WBcel235:V:3523587:3524575:1 gene:C07G3.2 gene_biotype:protein_coding transcript_biotype:protein_coding	K09935	-	-	GO:0006952//defense response	gi|17557728|ref|NP_503983.1|/9.25977e-111/Protein IRG-1 [Caenorhabditis elegans]
K11H12.4	1290	1	86	0.0686206	6.01669	6.45418	Up	2.49178e-25	7.59038e-24	cdna:known chromosome:WBcel235:IV:674038:675883:-1 gene:K11H12.4 gene_biotype:protein_coding transcript_biotype:protein_coding	-	-	-	-	gi|17541436|ref|NP_499969.1|/0/Protein K11H12.4 [Caenorhabditis elegans]
Y58A7A.4	2757	6	497	0.192646	16.2693	6.40006	Up	7.1385e-141	9.95957e-139	cdna:known chromosome:WBcel235:V:5082002:5085007:-1 gene:Y58A7A.4 gene_biotype:protein_coding transcript_biotype:protein_coding	-	-	-	-	gi|17566034|ref|NP_504361.1|/0/Protein Y58A7A.4 [Caenorhabditis elegans]
C49G7.12	936	6	376	0.56744	36.2544	5.99755	Up	1.17844e-104	1.24499e-102	cdna:known chromosome:WBcel235:V:4038821:4039934:1 gene:C49G7.12 gene_biotype:protein_coding transcript_biotype:protein_coding	K15414	-	-	-	gi|193207485|ref|NP_001122885.1|/2.49363e-147/Protein C49G7.12 [Caenorhabditis elegans]
F25A2.1	913	2	102	0.193912	10.0827	5.70034	Up	1.02732e-28	3.47068e-27	cdna:known chromosome:WBcel235:V:1179604:1181548:1 gene:F25A2.1 gene_biotype:protein_coding transcript_biotype:protein_coding	-	-	GO:0016787//hydrolase activity	GO:0044238//primary metabolic process	gi|193207843|ref|NP_503390.2|/2.38337e-163/Protein F25A2.1 [Caenorhabditis elegans]
C05A9.1	3883	156	7818	3.55633	181.709	5.6751	Up	0	0	cdna:known chromosome:WBcel235:X:10854320:10859293:-1 gene:C05A9.1 gene_biotype:protein_coding transcript_biotype:protein_coding	K02021;K05660	-	-	-	gi|392927173|ref|NP_001257117.1|/0/Protein PGP-5, isoform b [Caenorhabditis elegans]
F54B8.4	557	53	2189	8.42297	354.682	5.39605	Up	0	0	cdna:known chromosome:WBcel235:V:15816464:15817143:1 gene:F54B8.4 gene_biotype:protein_coding transcript_biotype:protein_coding	-	-	-	-	gi|392922252|ref|NP_001256684.1|/6.09482e-53/Protein F54B8.4, isoform b [Caenorhabditis elegans]
Y39G10AR.6	1654	138	5346	7.38564	291.704	5.30364	Up	0	0	cdna:known chromosome:WBcel235:I:2333326:2338688:1 gene:Y39G10AR.6 gene_biotype:protein_coding transcript_biotype:protein_coding	K00699	GO:0031224//intrinsic to membrane	GO:0005488//binding;GO:0016757//transferase activity, transferring glycosyl groups	GO:0030258//lipid modification	gi|71994343|ref|NP_001021756.1|/0/Protein UGT-31 [Caenorhabditis elegans]
T24A6.7	770	2	73	0.229924	8.5562	5.21774	Up	3.84458e-20	9.34407e-19	cdna:known chromosome:WBcel235:V:3525274:3526307:1 gene:T24A6.7 gene_biotype:protein_coding transcript_biotype:protein_coding	K09935	-	-	GO:0006952//defense response	gi|17564644|ref|NP_503984.1|/5.31603e-120/Protein T24A6.7 [Caenorhabditis elegans]
C10H11.6	1862	225	8184	10.6966	396.675	5.21273	Up	0	0	cdna:known chromosome:WBcel235:I:4721178:4723960:1 gene:C10H11.6 gene_biotype:protein_coding transcript_biotype:protein_coding	K00699	GO:0031224//intrinsic to membrane	GO:0005488//binding;GO:0016757//transferase activity, transferring glycosyl groups	GO:0030258//lipid modification	gi|25141379|ref|NP_491435.2|/0/Protein UGT-26, isoform a [Caenorhabditis elegans]
Y39G8B.7	583	4	137	0.607346	21.2081	5.12595	Up	1.62769e-36	6.80761e-35	cdna:known chromosome:WBcel235:II:13994411:13995045:-1 gene:Y39G8B.7 gene_biotype:protein_coding transcript_biotype:protein_coding	-	-	-	-	gi|17537087|ref|NP_496930.1|/2.04854e-110/Protein Y39G8B.7 [Caenorhabditis elegans]
Y49C4A.8	2172	102	3313	4.15705	137.661	5.04942	Up	0	0	cdna:known chromosome:WBcel235:V:696523:699156:-1 gene:Y49C4A.8 gene_biotype:protein_coding transcript_biotype:protein_coding	K00699	GO:0031224//intrinsic to membrane	GO:0005488//binding;GO:0016757//transferase activity, transferring glycosyl groups	GO:0030258//lipid modification	gi|17565872|ref|NP_503298.1|/0/Protein UGT-29, isoform a [Caenorhabditis elegans]
C17H12.8	1262	631	20026	44.2603	1432.13	5.01601	Up	0	0	cdna:known chromosome:WBcel235:IV:6818606:6820643:1 gene:C17H12.8 gene_biotype:protein_coding transcript_biotype:protein_coding	-	-	-	-	gi|17538686|ref|NP_501048.1|/0/Protein C17H12.8 [Caenorhabditis elegans]
C34H4.1	1230	74	2260	5.32563	165.826	4.96057	Up	0	0	cdna:known chromosome:WBcel235:IV:1555580:1557562:1 gene:C34H4.1 gene_biotype:protein_coding transcript_biotype:protein_coding	-	-	-	-	gi|17539042|ref|NP_500097.1|/0/Protein C34H4.1 [Caenorhabditis elegans]
T21E8.1	3971	86	2608	1.91709	59.2729	4.95038	Up	0	0	cdna:known chromosome:WBcel235:X:10871214:10876228:-1 gene:T21E8.1 gene_biotype:protein_coding transcript_biotype:protein_coding	K02021;K05660	-	-	-	gi|392927176|ref|NP_001257118.1|/0/Protein PGP-6, isoform c [Caenorhabditis elegans]
C45B11.2	843	1	29	0.105007	3.1047	4.8859	Up	2.24644e-08	2.71549e-07	cdna:known chromosome:WBcel235:V:11042817:11043855:1 gene:C45B11.2 gene_biotype:protein_coding transcript_biotype:protein_coding	-	-	-	-	gi|193207459|ref|NP_505811.2|/1.70504e-157/Protein C45B11.2 [Caenorhabditis elegans]
T16G1.5	1592	63	1742	3.50301	98.7538	4.81717	Up	0	0	cdna:known chromosome:WBcel235:V:12937580:12939506:-1 gene:T16G1.5 gene_biotype:protein_coding transcript_biotype:protein_coding	-	-	GO:0016740//transferase activity	-	gi|17564354|ref|NP_506235.1|/0/Protein T16G1.5 [Caenorhabditis elegans]
C10H11.4	1713	63	1720	3.25557	90.6191	4.79883	Up	0	0	cdna:known chromosome:WBcel235:I:4727301:4730366:1 gene:C10H11.4 gene_biotype:protein_coding transcript_biotype:protein_coding	K00699	GO:0031224//intrinsic to membrane	GO:0005488//binding;GO:0016757//transferase activity, transferring glycosyl groups	GO:0030258//lipid modification	gi|17505558|ref|NP_491437.1|/0/Protein UGT-28 [Caenorhabditis elegans]
F08F3.7	1590	169	4598	9.40879	260.988	4.79383	Up	0	0	cdna:known chromosome:WBcel235:V:5421012:5423305:-1 gene:F08F3.7 gene_biotype:protein_coding transcript_biotype:protein_coding	K07413;K00493;K07417	GO:0031224//intrinsic to membrane	GO:0016491//oxidoreductase activity;GO:0046906//tetrapyrrole binding;GO:0046914//transition metal ion binding	GO:0006911//phagocytosis, engulfment;GO:0010212//response to ionizing radiation;GO:0044710	gi|17559386|ref|NP_504435.1|/0/Protein CYP-14A5 [Caenorhabditis elegans]
Y58A7A.5	1131	31	811	2.42629	64.7153	4.73728	Up	6.2138e-201	1.11343e-198	cdna:known chromosome:WBcel235:V:5085886:5087121:-1 gene:Y58A7A.5 gene_biotype:protein_coding transcript_biotype:protein_coding	-	-	-	-	gi|17566036|ref|NP_504362.1|/1.18234e-176/Protein Y58A7A.5 [Caenorhabditis elegans]
Y26D4A.21	485	1	25	0.182517	4.65208	4.67177	Up	3.26946e-07	3.49654e-06	cdna:known chromosome:WBcel235:I:13101357:13101901:1 gene:Y26D4A.21 gene_biotype:protein_coding transcript_biotype:protein_coding	-	-	-	-	gi|453230378|ref|NP_001122536.2|/1.84174e-71/Protein Y26D4A.21 [Caenorhabditis elegans]
C49G7.7	1964	4	93	0.180286	4.27356	4.56708	Up	9.90366e-24	2.83269e-22	cdna:known chromosome:WBcel235:V:4034476:4038054:1 gene:C49G7.7 gene_biotype:protein_coding transcript_biotype:protein_coding	-	-	-	-	gi|193207488|ref|NP_504125.2|/0/Protein C49G7.7 [Caenorhabditis elegans]
Y39A3B.7	409	1	23	0.216432	5.0752	4.55148	Up	1.23815e-06	1.22323e-05	cdna:known chromosome:WBcel235:III:1983749:1984960:-1 gene:Y39A3B.7 gene_biotype:protein_coding transcript_biotype:protein_coding	-	-	-	-	gi|392894215|ref|NP_001254851.1|/9.06999e-25/Protein Y39A3B.7 [Caenorhabditis elegans]
T05F1.9	1151	5	114	0.384538	8.93878	4.53888	Up	1.02662e-28	3.47474e-27	cdna:known chromosome:WBcel235:I:9645699:9647676:1 gene:T05F1.9 gene_biotype:protein_coding transcript_biotype:protein_coding	-	-	-	-	gi|17508893|ref|NP_492562.1|/0/Protein T05F1.9 [Caenorhabditis elegans]
F45E4.1	679	5	110	0.651845	14.6208	4.48735	Up	1.43945e-27	4.7064e-26	cdna:known chromosome:WBcel235:IV:7634832:7635707:1 gene:F45E4.1 gene_biotype:protein_coding transcript_biotype:protein_coding	K07977	GO:0044431//Golgi apparatus part	GO:0017111//nucleoside-triphosphatase activity;GO:0032550	GO:0001505//regulation of neurotransmitter levels;GO:0001654//eye development;GO:0006486//protein glycosylation;GO:0006897//endocytosis;GO:0007265//Ras protein signal transduction;GO:0015031//protein transport;GO:0019915//lipid storage;GO:0022604//regulation of cell morphogenesis;GO:0022610;GO:0048193//Golgi vesicle transport	gi|17538190|ref|NP_501242.1|/6.85637e-99/Protein ARF-1.1 [Caenorhabditis elegans]
F14F9.3	2599	21	449	0.715249	15.5915	4.44617	Up	8.96244e-108	9.75039e-106	cdna:known chromosome:WBcel235:V:5138195:5141488:1 gene:F14F9.3 gene_biotype:protein_coding transcript_biotype:protein_coding	-	-	-	-	gi|17559660|ref|NP_504375.1|/0/Protein F14F9.3 [Caenorhabditis elegans]
C06B3.7	984	24	506	2.15904	46.4092	4.42595	Up	6.52576e-121	8.05887e-119	cdna:known chromosome:WBcel235:V:13909748:13911524:1 gene:C06B3.7 gene_biotype:protein_coding transcript_biotype:protein_coding	K15414	-	-	-	gi|17557674|ref|NP_506451.1|/9.25649e-172/Protein C06B3.7 [Caenorhabditis elegans]
F14F9.4	2852	123	2420	3.81768	76.5799	4.3262	Up	0	0	cdna:known chromosome:WBcel235:V:5132741:5137100:1 gene:F14F9.4 gene_biotype:protein_coding transcript_biotype:protein_coding	-	-	-	-	gi|17559662|ref|NP_504374.1|/0/Protein F14F9.4 [Caenorhabditis elegans]
F22E10.1	4085	35	648	0.758439	14.3163	4.23849	Up	4.51246e-150	6.87285e-148	cdna:known chromosome:WBcel235:X:12731850:12737432:1 gene:F22E10.1 gene_biotype:protein_coding transcript_biotype:protein_coding	K02021;K05658	-	-	-	gi|17567265|ref|NP_510126.1|/0/Protein PGP-12 [Caenorhabditis elegans]
ZC239.12	863	2	34	0.205146	3.55563	4.11538	Up	7.42348e-09	9.38955e-08	cdna:known chromosome:WBcel235:II:3207683:3208751:-1 gene:ZC239.12 gene_biotype:protein_coding transcript_biotype:protein_coding	K15074	-	GO:0005488//binding	-	gi|392889493|ref|NP_494473.2|/1.46527e-127/Protein SDZ-35 [Caenorhabditis elegans]
C32H11.1	1561	1	17	0.0567076	0.982867	4.11538	Up	6.46026e-05	0.00049507	cdna:known chromosome:WBcel235:IV:12912790:12914969:-1 gene:C32H11.1 gene_biotype:protein_coding transcript_biotype:protein_coding	-	-	-	-	gi|392901365|ref|NP_001255688.1|/0/Protein C32H11.1, isoform b [Caenorhabditis elegans]
F14F9.2	844	3	49	0.314647	5.23965	4.05767	Up	3.49002e-12	5.61012e-11	cdna:known chromosome:WBcel235:V:5144831:5145781:1 gene:F14F9.2 gene_biotype:protein_coding transcript_biotype:protein_coding	-	-	-	-	gi|17559658|ref|NP_504377.1|/5.16957e-130/Protein F14F9.2 [Caenorhabditis elegans]
Y119D3A.3	933	1	16	0.0948774	1.5477	4.02792	Up	0.000123938	0.000908995	cdna:known chromosome:WBcel235:III:1295684:1297069:1 gene:Y119D3A.3 gene_biotype:protein_coding transcript_biotype:protein_coding	-	-	-	-	gi|17556719|ref|NP_497375.1|/4.83288e-167/Protein FBXA-35 [Caenorhabditis elegans]
ZK228.4	930	71	1082	6.75803	105.001	3.95766	Up	1.57485e-237	3.12865e-235	cdna:known chromosome:WBcel235:V:18462804:18465320:1 gene:ZK228.4 gene_biotype:protein_coding transcript_biotype:protein_coding	-	-	-	-	gi|453232694|ref|NP_001263925.1|/5.65175e-155/Protein ZK228.4, isoform c [Caenorhabditis elegans]
F56D6.2	2056	478	6967	20.5802	305.824	3.89337	Up	0	0	cdna:known chromosome:WBcel235:IV:3922165:3925045:1 gene:F56D6.2 gene_biotype:protein_coding transcript_biotype:protein_coding	-	-	-	-	gi|25148855|ref|NP_500437.2|/0/Protein CLEC-67 [Caenorhabditis elegans]
F33H12.7	590	5	72	0.750175	11.0136	3.87592	Up	7.71258e-17	1.67414e-15	cdna:known chromosome:WBcel235:II:2586077:2586911:-1 gene:F33H12.7 gene_biotype:protein_coding transcript_biotype:protein_coding	-	-	-	-	gi|193204507|ref|NP_001122610.1|/1.37412e-85/Protein F33H12.7 [Caenorhabditis elegans]
F55G11.5	1226	31	421	2.23829	30.9913	3.7914	Up	1.9158e-90	1.77741e-88	cdna:known chromosome:WBcel235:IV:12965387:12967376:1 gene:F55G11.5 gene_biotype:protein_coding transcript_biotype:protein_coding	-	-	-	-	gi|392901378|ref|NP_001255690.1|/1.70526e-171/Protein DOD-22, isoform b [Caenorhabditis elegans]
F14H8.6	2574	10	134	0.343903	4.69835	3.77208	Up	1.17974e-29	4.15453e-28	cdna:known chromosome:WBcel235:V:15025740:15030250:-1 gene:F14H8.6 gene_biotype:protein_coding transcript_biotype:protein_coding	K05326;K04948;K04950	GO:0031224//intrinsic to membrane	GO:0015075//ion transmembrane transporter activity	GO:0044763;GO:0044765	gi|193207729|ref|NP_001122918.1|/0/Protein CNG-1, isoform b [Caenorhabditis elegans]
C49G7.5	939	12	157	1.13125	15.0898	3.73758	Up	2.84852e-34	1.15694e-32	cdna:known chromosome:WBcel235:V:4042404:4043600:1 gene:C49G7.5 gene_biotype:protein_coding transcript_biotype:protein_coding	K15414	-	-	GO:0006952//defense response	gi|17558702|ref|NP_504128.1|/8.96986e-145/Protein IRG-2 [Caenorhabditis elegans]
K11D12.5	800	301	3903	33.3059	440.309	3.72467	Up	0	0	cdna:known chromosome:WBcel235:V:5029324:5030811:-1 gene:K11D12.5 gene_biotype:protein_coding transcript_biotype:protein_coding	K15382	GO:0031224//intrinsic to membrane	-	GO:0006950//response to stress;GO:0044765	gi|17562516|ref|NP_504349.1|/5.58054e-107/Protein SWT-7 [Caenorhabditis elegans]
Y58A7A.3	2799	93	1164	2.9412	37.5318	3.67364	Up	6.35176e-241	1.33438e-238	cdna:known chromosome:WBcel235:V:5077849:5080896:-1 gene:Y58A7A.3 gene_biotype:protein_coding transcript_biotype:protein_coding	-	-	-	-	gi|17566032|ref|NP_504360.1|/0/Protein Y58A7A.3 [Caenorhabditis elegans]
F43C1.7	510	4	50	0.694279	8.84807	3.67177	Up	1.29397e-11	1.99073e-10	cdna:known chromosome:WBcel235:III:4241477:4242593:-1 gene:F43C1.7 gene_biotype:protein_coding transcript_biotype:protein_coding	-	-	-	-	gi|392894624|ref|NP_001022586.2|/6.3917e-76/Protein F43C1.7 [Caenorhabditis elegans]
C17H12.6	883	4	48	0.400999	4.90602	3.61288	Up	4.54536e-11	6.68347e-10	cdna:known chromosome:WBcel235:IV:6821342:6822489:-1 gene:C17H12.6 gene_biotype:protein_coding transcript_biotype:protein_coding	-	-	-	-	gi|17538684|ref|NP_501049.1|/2.24235e-163/Protein C17H12.6 [Caenorhabditis elegans]
F08E10.7	681	2	24	0.259972	3.18063	3.61288	Up	4.5084e-06	4.15742e-05	cdna:known chromosome:WBcel235:V:17486431:17487327:1 gene:F08E10.7 gene_biotype:protein_coding transcript_biotype:protein_coding	-	-	-	-	gi|17559376|ref|NP_507429.1|/1.34593e-110/Protein SCL-24 [Caenorhabditis elegans]
F36G9.12	2267	4	48	0.15619	1.9109	3.61288	Up	4.54536e-11	6.6781e-10	cdna:known chromosome:WBcel235:V:15978716:15981764:1 gene:F36G9.12 gene_biotype:protein_coding transcript_biotype:protein_coding	K00680	-	GO:0016746//transferase activity, transferring acyl groups	GO:0040009//regulation of growth rate	gi|212646401|ref|NP_507007.3|/0/Protein OAC-20 [Caenorhabditis elegans]
Y37H2A.14	690	30	356	3.84872	46.5639	3.59676	Up	1.45939e-73	1.1022e-71	cdna:known chromosome:WBcel235:V:18143738:18144721:1 gene:Y37H2A.14 gene_biotype:protein_coding transcript_biotype:protein_coding	-	-	-	-	gi|392922704|ref|NP_001256792.1|/1.583e-82/Protein Y37H2A.14 [Caenorhabditis elegans]
K08D8.5	1077	76	894	6.24658	74.9153	3.58412	Up	1.05047e-181	1.79434e-179	cdna:known chromosome:WBcel235:IV:12910645:12912136:-1 gene:K08D8.5 gene_biotype:protein_coding transcript_biotype:protein_coding	-	-	-	-	gi|17541314|ref|NP_502462.1|/0/Protein K08D8.5 [Caenorhabditis elegans]
F35E12.5	1117	5	58	0.396243	4.68623	3.56397	Up	5.31414e-13	9.02663e-12	cdna:known chromosome:WBcel235:V:13737007:13738471:-1 gene:F35E12.5 gene_biotype:protein_coding transcript_biotype:protein_coding	-	-	-	-	gi|71992676|ref|NP_506402.2|/0/Protein F35E12.5 [Caenorhabditis elegans]
F54D5.4	627	182	1940	25.695	279.243	3.44197	Up	0	0	cdna:known chromosome:WBcel235:II:11569811:11571002:1 gene:F54D5.4 gene_biotype:protein_coding transcript_biotype:protein_coding	-	-	-	-	gi|17534349|ref|NP_496472.1|/5.27263e-105/Protein F54D5.4 [Caenorhabditis elegans]
T05B4.8	939	2	20	0.188542	1.92226	3.34985	Up	5.47974e-05	0.000427457	cdna:known chromosome:WBcel235:V:4115192:4116736:-1 gene:T05B4.8 gene_biotype:protein_coding transcript_biotype:protein_coding	-	-	-	-	gi|17563862|ref|NP_504145.1|/4.14738e-158/Protein T05B4.8 [Caenorhabditis elegans]
R10D12.9	1035	14	136	1.19738	11.859	3.30803	Up	4.63498e-27	1.49144e-25	cdna:known chromosome:WBcel235:V:13954356:13956378:1 gene:R10D12.9 gene_biotype:protein_coding transcript_biotype:protein_coding	K15382	GO:0031224//intrinsic to membrane	-	GO:0006950//response to stress;GO:0044765	gi|193208474|ref|NP_506464.2|/2.65488e-124/Protein SWT-6 [Caenorhabditis elegans]
F58E6.4	487	4	38	0.727069	7.04212	3.27585	Up	2.20638e-08	2.67414e-07	cdna:known chromosome:WBcel235:V:9749877:9750408:-1 gene:F58E6.4 gene_biotype:protein_coding transcript_biotype:protein_coding	-	-	-	-	gi|17561632|ref|NP_505514.1|/3.70004e-72/Protein F58E6.4 [Caenorhabditis elegans]
C31A11.5	2184	32	289	1.29701	11.9425	3.20284	Up	2.93292e-54	1.70716e-52	cdna:known chromosome:WBcel235:V:16302748:16306156:1 gene:C31A11.5 gene_biotype:protein_coding transcript_biotype:protein_coding	K00680	GO:0031224//intrinsic to membrane	GO:0016746//transferase activity, transferring acyl groups	-	gi|17558338|ref|NP_507118.1|/0/Protein OAC-6 [Caenorhabditis elegans]
Y94H6A.10	771	173	1562	19.8626	182.842	3.20247	Up	8.11666e-286	2.06039e-283	cdna:known chromosome:WBcel235:IV:2709900:2710670:-1 gene:Y94H6A.10 gene_biotype:protein_coding transcript_biotype:protein_coding	-	-	-	-	gi|71999639|ref|NP_001023589.1|/1.08113e-88/Protein Y94H6A.10 [Caenorhabditis elegans]
C25F9.11	671	45	381	5.93655	51.245	3.10971	Up	4.33514e-69	3.13175e-67	cdna:known chromosome:WBcel235:V:19432441:19433072:-1 gene:C25F9.11 gene_biotype:protein_coding transcript_biotype:protein_coding	-	-	-	-	gi|193207346|ref|NP_001122859.1|/8.90276e-45/Protein C25F9.11 [Caenorhabditis elegans]
F14D2.2	674	3	25	0.394009	3.34756	3.08681	Up	1.21533e-05	0.000105123	cdna:known chromosome:WBcel235:II:3359139:3360255:1 gene:F14D2.2 gene_biotype:protein_coding transcript_biotype:protein_coding	-	-	-	GO:0002164//larval development;GO:0009653//anatomical structure morphogenesis;GO:0009790//embryo development	gi|17533185|ref|NP_494517.1|/6.12735e-68/Protein F14D2.2 [Caenorhabditis elegans]
F35E12.8	1604	42	337	2.31787	18.9616	3.03221	Up	7.85964e-60	5.04037e-58	cdna:known chromosome:WBcel235:V:13749185:13751921:-1 gene:F35E12.8 gene_biotype:protein_coding transcript_biotype:protein_coding	-	-	-	-	gi|392921619|ref|NP_001256543.1|/7.25109e-86/Protein F35E12.8, isoform a [Caenorhabditis elegans]
F35E12.4	1202	36	288	2.6512	21.624	3.02792	Up	2.7265e-51	1.54279e-49	cdna:pseudogene chromosome:WBcel235:V:13731506:13733387:-1 gene:F35E12.4 gene_biotype:pseudogene transcript_biotype:pseudogene	-	-	-	-	gi|71992690|ref|NP_001023877.1|/5.17212e-106/Protein DCT-17, isoform a [Caenorhabditis elegans]
C18H7.11	1426	9	71	0.558685	4.49353	3.00774	Up	1.32639e-13	2.35364e-12	cdna:known chromosome:WBcel235:IV:596902:598769:1 gene:C18H7.11 gene_biotype:protein_coding transcript_biotype:protein_coding	-	-	-	-	gi|86565344|ref|NP_001033400.1|/0/Protein C18H7.11 [Caenorhabditis elegans]
T19D12.4	3216	492	3833	13.5423	107.565	2.98966	Up	0	0	cdna:known chromosome:WBcel235:II:6631154:6637099:1 gene:T19D12.4 gene_biotype:protein_coding transcript_biotype:protein_coding	K06238;K08132	-	-	GO:0006950//response to stress	gi|17536325|ref|NP_495348.1|/0/Protein T19D12.4, isoform a [Caenorhabditis elegans]
Y22F5A.5	924	1225	9527	117.357	930.536	2.98716	Up	0	0	cdna:known chromosome:WBcel235:V:10280310:10281470:-1 gene:Y22F5A.5 gene_biotype:protein_coding transcript_biotype:protein_coding	-	-	GO:0005488//binding	GO:0042742//defense response to bacterium	gi|17565330|ref|NP_505643.1|/3.18277e-147/Protein LYS-2 [Caenorhabditis elegans]
F57B9.3	1154	5	38	0.383538	2.97185	2.95392	Up	1.00657e-07	1.13562e-06	cdna:known chromosome:WBcel235:III:6939919:6941736:1 gene:F57B9.3 gene_biotype:protein_coding transcript_biotype:protein_coding	K03257	-	GO:0003676//nucleic acid binding;GO:0032550;GO:0042623//ATPase activity, coupled	GO:0002164//larval development;GO:0009790//embryo development;GO:0010259//multicellular organismal aging;GO:0010876//lipid localization;GO:0040009//regulation of growth rate	gi|17553716|ref|NP_498514.1|/0/Protein F57B9.3 [Caenorhabditis elegans]
T24C4.4	567	13	94	2.02957	14.9621	2.88207	Up	6.57314e-17	1.43362e-15	cdna:known chromosome:WBcel235:III:872622:873531:-1 gene:T24C4.4 gene_biotype:protein_coding transcript_biotype:protein_coding	-	-	-	-	gi|115534054|ref|NP_497282.2|/2.7496e-85/Protein T24C4.4 [Caenorhabditis elegans]
C15B12.8	1415	13	93	0.813264	5.93165	2.86664	Up	1.16951e-16	2.52363e-15	cdna:known chromosome:WBcel235:X:6474274:6476780:1 gene:C15B12.8 gene_biotype:protein_coding transcript_biotype:protein_coding	K00306	GO:0042579//microbody	GO:0016647//oxidoreductase activity, acting on the CH-NH group of donors, oxygen as acceptor	GO:0019474	gi|115535191|ref|NP_741814.2|/0/Protein C15B12.8 [Caenorhabditis elegans]
F08G5.6	1146	22	157	1.69935	12.3641	2.86311	Up	3.86848e-27	1.24699e-25	cdna:known chromosome:WBcel235:IV:12435827:12438274:1 gene:F08G5.6 gene_biotype:protein_coding transcript_biotype:protein_coding	-	-	-	-	gi|17539724|ref|NP_502374.1|/0/Protein F08G5.6 [Caenorhabditis elegans]
F55G11.2	1078	6	42	0.492694	3.51625	2.83527	Up	3.98358e-08	4.70032e-07	cdna:known chromosome:WBcel235:IV:12967448:12969289:-1 gene:F55G11.2 gene_biotype:protein_coding transcript_biotype:protein_coding	-	-	-	-	gi|17540682|ref|NP_502483.1|/0/Protein F55G11.2 [Caenorhabditis elegans]
Y17D7B.3	780	3	21	0.340464	2.42982	2.83527	Up	0.00012975	0.000947815	cdna:known chromosome:WBcel235:V:18784954:18786788:-1 gene:Y17D7B.3 gene_biotype:protein_coding transcript_biotype:protein_coding	K15414	-	-	-	gi|17565260|ref|NP_507670.1|/4.07065e-115/Protein Y17D7B.3 [Caenorhabditis elegans]
E03H4.8	1471	213	1486	12.8177	91.1706	2.83043	Up	1.92771e-240	4.00371e-238	cdna:known chromosome:WBcel235:I:12424555:12426766:-1 gene:E03H4.8 gene_biotype:protein_coding transcript_biotype:protein_coding	-	GO:0043234//protein complex	-	GO:0015031//protein transport	gi|17506481|ref|NP_493151.1|/0/Protein E03H4.8 [Caenorhabditis elegans]
C31A11.7	2233	16	109	0.634272	4.40541	2.7961	Up	7.81056e-19	1.83252e-17	cdna:known chromosome:WBcel235:V:16309805:16314752:1 gene:C31A11.7 gene_biotype:protein_coding transcript_biotype:protein_coding	K00680	-	GO:0016746//transferase activity, transferring acyl groups	GO:0040009//regulation of growth rate	gi|212646266|ref|NP_507120.3|/0/Protein OAC-7 [Caenorhabditis elegans]
F54E2.1	1271	156	1043	10.8648	74.0607	2.76904	Up	1.90039e-165	3.12914e-163	cdna:known chromosome:WBcel235:V:2810427:2811985:1 gene:F54E2.1 gene_biotype:protein_coding transcript_biotype:protein_coding	-	-	-	-	gi|25148882|ref|NP_503761.2|/0/Protein F54E2.1 [Caenorhabditis elegans]
Y39A3A.4	996	11	68	0.977637	6.16167	2.65595	Up	1.16095e-11	1.79972e-10	cdna:known chromosome:WBcel235:III:2073009:2076520:-1 gene:Y39A3A.4 gene_biotype:protein_coding transcript_biotype:protein_coding	K06777;K01104	-	GO:0004721//phosphoprotein phosphatase activity	GO:0006470//protein dephosphorylation	gi|17555752|ref|NP_497497.1|/0/Protein Y39A3A.4 [Caenorhabditis elegans]
M02F4.7	1178	150	923	11.2717	70.714	2.64929	Up	8.80818e-140	1.21043e-137	cdna:known chromosome:WBcel235:X:3031723:3033203:1 gene:M02F4.7 gene_biotype:protein_coding transcript_biotype:protein_coding	K06560	-	GO:0005488//binding	-	gi|17568961|ref|NP_508518.1|/0/Protein CLEC-265 [Caenorhabditis elegans]
ZC443.6	1783	30	183	1.48941	9.26293	2.63673	Up	7.34702e-29	2.49594e-27	cdna:known chromosome:WBcel235:V:12825026:12827432:1 gene:ZC443.6 gene_biotype:protein_coding transcript_biotype:protein_coding	K00699	GO:0031224//intrinsic to membrane	GO:0005488//binding;GO:0016757//transferase activity, transferring glycosyl groups	GO:0030258//lipid modification	gi|17566702|ref|NP_506210.1|/0/Protein UGT-16 [Caenorhabditis elegans]
Y38C9A.2	2476	964	5746	34.4644	209.442	2.60337	Up	0	0	cdna:known chromosome:WBcel235:V:118043:122789:-1 gene:Y38C9A.2 gene_biotype:protein_coding transcript_biotype:protein_coding	K03231	GO:0030529//ribonucleoprotein complex	GO:0017111//nucleoside-triphosphatase activity;GO:0032550	GO:0009154//purine ribonucleotide catabolic process	gi|17565438|ref|NP_503137.1|/0/Protein CGP-1 [Caenorhabditis elegans]
F22E10.2	4086	104	612	2.25309	13.5177	2.58487	Up	8.63584e-91	8.05292e-89	cdna:known chromosome:WBcel235:X:12738996:12744375:1 gene:F22E10.2 gene_biotype:protein_coding transcript_biotype:protein_coding	K05658	-	-	-	gi|115535101|ref|NP_510127.2|/0/Protein PGP-13 [Caenorhabditis elegans]
F35E12.7	2275	49	288	1.9066	11.4251	2.58313	Up	1.44414e-43	7.23136e-42	cdna:known chromosome:WBcel235:V:13727761:13730776:-1 gene:F35E12.7 gene_biotype:protein_coding transcript_biotype:protein_coding	-	GO:0044424//intracellular part	GO:0016462//pyrophosphatase activity	GO:0006793//phosphorus metabolic process	gi|71992706|ref|NP_001023880.1|/0/Protein DCT-17, isoform d [Caenorhabditis elegans]
Y47D3A.2	992	66	384	5.88948	34.9356	2.56849	Up	3.40818e-57	2.09735e-55	cdna:known chromosome:WBcel235:III:11136802:11138894:-1 gene:Y47D3A.2 gene_biotype:protein_coding transcript_biotype:protein_coding	-	-	-	-	gi|17555928|ref|NP_499435.1|/2.72128e-171/Protein FBXA-128 [Caenorhabditis elegans]
C25D7.5	1213	70	406	5.10836	30.2074	2.56397	Up	2.9335e-60	1.88787e-58	cdna:known chromosome:WBcel235:V:15053758:15056291:1 gene:C25D7.5 gene_biotype:protein_coding transcript_biotype:protein_coding	-	-	-	-	gi|193207339|ref|NP_506705.2|/0/Protein C25D7.5 [Caenorhabditis elegans]
C10C5.2	1500	37	211	2.18351	12.6952	2.53956	Up	9.60232e-32	3.63357e-30	cdna:known chromosome:WBcel235:IV:9371508:9373636:1 gene:C10C5.2 gene_biotype:protein_coding transcript_biotype:protein_coding	-	-	-	-	gi|392900045|ref|NP_501649.2|/0/Protein C10C5.2 [Caenorhabditis elegans]
B0205.13	444	8	45	1.59497	9.14699	2.51977	Up	9.52494e-08	1.07794e-06	cdna:known chromosome:WBcel235:I:10727751:10728795:-1 gene:B0205.13 gene_biotype:protein_coding transcript_biotype:protein_coding	-	-	-	-	gi|115532232|ref|NP_001040630.1|/1.18205e-40/Protein B0205.13 [Caenorhabditis elegans]
C49A9.8	1747	136	735	6.89113	37.9702	2.46206	Up	7.38002e-103	7.57779e-101	cdna:known chromosome:WBcel235:IV:6206830:6209527:-1 gene:C49A9.8 gene_biotype:protein_coding transcript_biotype:protein_coding	K00699	-	GO:0016757//transferase activity, transferring glycosyl groups	GO:0044238//primary metabolic process;GO:0071704	gi|71985017|ref|NP_500931.2|/0/Protein UGT-24 [Caenorhabditis elegans]
K04H4.6	1313	46	243	3.10126	16.7028	2.42917	Up	1.39284e-34	5.69506e-33	cdna:known chromosome:WBcel235:III:9367273:9370386:1 gene:K04H4.6 gene_biotype:protein_coding transcript_biotype:protein_coding	K01158;K04	GO:0043231//intracellular membrane-bounded organelle	GO:0016889//endodeoxyribonuclease activity, producing 3'-phosphomonoesters	GO:0000737//DNA catabolic process, endonucleolytic;GO:0012501//programmed cell death	gi|32564440|ref|NP_499061.2|/0/Protein CRN-6, isoform b [Caenorhabditis elegans]
F47B8.10	1781	6	30	0.298217	1.52022	2.34985	Up	3.22072e-05	0.000261506	cdna:known chromosome:WBcel235:V:14343068:14345660:1 gene:F47B8.10 gene_biotype:protein_coding transcript_biotype:protein_coding	K15108;K08171	GO:0031224//intrinsic to membrane	-	GO:0009790//embryo development;GO:0035264//multicellular organism growth;GO:0040009//regulation of growth rate;GO:0044763	gi|17561094|ref|NP_506556.1|/0/Protein F47B8.10 [Caenorhabditis elegans]
F01G10.3	1640	56	274	3.02266	15.0784	2.3186	Up	8.77688e-37	3.6877e-35	cdna:known chromosome:WBcel235:IV:10233320:10235329:-1 gene:F01G10.3 gene_biotype:protein_coding transcript_biotype:protein_coding	K00022;K07514	-	GO:0016616//oxidoreductase activity, acting on the CH-OH group of donors, NAD or NADP as acceptor;GO:0036094//small molecule binding;GO:0048037//cofactor binding	GO:0032787//monocarboxylic acid metabolic process	gi|71985930|ref|NP_501875.2|/0/Protein ECH-9 [Caenorhabditis elegans]
H21P03.1	781	577	2749	65.3987	317.667	2.28018	Up	0	0	cdna:known chromosome:WBcel235:IV:11479358:11480185:-1 gene:H21P03.1 gene_biotype:protein_coding transcript_biotype:protein_coding	K03627	GO:0005667//transcription factor complex	GO:0001071//nucleic acid binding transcription factor activity;GO:0003677//DNA binding;GO:0003712//transcription cofactor activity;GO:0005515//protein binding;GO:0008080//N-acetyltransferase activity;GO:0016741	GO:0003158//endothelium development;GO:0006351//transcription, DNA-dependent;GO:0006629//lipid metabolic process;GO:0048869//cellular developmental process;GO:0051099//positive regulation of binding	gi|17541030|ref|NP_502166.1|/3.14584e-83/Protein MBF-1 [Caenorhabditis elegans]
C18C4.3	1602	250	1178	13.8141	66.3639	2.26426	Up	3.03476e-148	4.50946e-146	cdna:known chromosome:WBcel235:V:5545703:5548062:-1 gene:C18C4.3 gene_biotype:protein_coding transcript_biotype:protein_coding	K00699	GO:0031224//intrinsic to membrane;GO:0044424//intracellular part	GO:0016757//transferase activity, transferring glycosyl groups;GO:0016876//ligase activity, forming aminoacyl-tRNA and related compounds;GO:0032550	GO:0006412//translation;GO:0030258//lipid modification	gi|71984552|ref|NP_504464.2|/0/Protein UGT-48 [Caenorhabditis elegans]
ZK228.3	1008	87	405	7.64017	36.2613	2.24675	Up	1.23354e-51	7.00166e-50	cdna:known chromosome:WBcel235:V:18458236:18461231:-1 gene:ZK228.3 gene_biotype:protein_coding transcript_biotype:protein_coding	-	-	-	-	gi|17566810|ref|NP_507614.1|/0/Protein ZK228.3 [Caenorhabditis elegans]
F19B2.5	743	115	535	13.701	64.9851	2.24582	Up	1.23399e-67	8.74169e-66	cdna:known chromosome:WBcel235:V:20162648:20163432:-1 gene:F19B2.5 gene_biotype:protein_coding transcript_biotype:protein_coding	K15173;K15711	-	-	-	gi|17559866|ref|NP_507886.1|/3.05978e-77/Protein F19B2.5 [Caenorhabditis elegans]
T24E12.5	2046	111	514	4.80244	22.6729	2.23913	Up	8.17854e-65	5.57758e-63	cdna:known chromosome:WBcel235:II:3753921:3757356:1 gene:T24E12.5 gene_biotype:protein_coding transcript_biotype:protein_coding	-	-	-	-	gi|71996153|ref|NP_494641.2|/0/Protein T24E12.5 [Caenorhabditis elegans]
F48C1.11	647	8	37	1.09454	5.16115	2.23737	Up	6.87168e-06	6.17775e-05	cdna:known chromosome:WBcel235:I:5333779:5334931:-1 gene:F48C1.11 gene_biotype:protein_coding transcript_biotype:protein_coding	-	-	-	-	gi|392885579|ref|NP_001249861.1|/4.36117e-20/Protein F48C1.11 [Caenorhabditis elegans]
H02F09.3	3828	65	300	1.50309	7.07291	2.23437	Up	2.04094e-38	8.96689e-37	cdna:known chromosome:WBcel235:X:1568678:1572854:1 gene:H02F09.3 gene_biotype:protein_coding transcript_biotype:protein_coding	K14972;K08867	-	-	-	gi|17568435|ref|NP_508295.1|/9.3764e-120/Protein H02F09.3 [Caenorhabditis elegans]
Y41C4A.11	1250	26	120	1.84123	8.66403	2.23437	Up	2.96118e-16	6.30052e-15	cdna:known chromosome:WBcel235:III:11719900:11723602:1 gene:Y41C4A.11 gene_biotype:protein_coding transcript_biotype:protein_coding	K05236	-	-	-	gi|17555848|ref|NP_499518.1|/0/Protein Y41C4A.11 [Caenorhabditis elegans]
F55A12.6	1344	9	41	0.592772	2.75317	2.21555	Up	2.44516e-06	2.33004e-05	cdna:known chromosome:WBcel235:I:5338922:5342049:1 gene:F55A12.6 gene_biotype:protein_coding transcript_biotype:protein_coding	-	-	-	-	gi|71987056|ref|NP_491571.2|/3.37325e-83/Protein F55A12.6 [Caenorhabditis elegans]
F56D2.5	1643	71	321	3.8253	17.6326	2.2046	Up	2.41974e-40	1.10014e-38	cdna:known chromosome:WBcel235:III:5578423:5581220:-1 gene:F56D2.5 gene_biotype:protein_coding transcript_biotype:protein_coding	K11971	-	GO:0046914//transition metal ion binding	GO:0002164//larval development;GO:0040009//regulation of growth rate	gi|17553686|ref|NP_498196.1|/0/Protein F56D2.5 [Caenorhabditis elegans]
Y82E9BL.13	997	50	222	4.43935	20.0959	2.17848	Up	5.49958e-28	1.83089e-26	cdna:known chromosome:WBcel235:III:1305755:1308294:-1 gene:Y82E9BL.13 gene_biotype:protein_coding transcript_biotype:protein_coding	-	-	-	-	gi|115534077|ref|NP_497378.2|/3.97925e-162/Protein FBXA-79 [Caenorhabditis elegans]
K12B6.3	1023	19	84	1.64408	7.41058	2.17231	Up	1.97884e-11	3.00393e-10	cdna:known chromosome:WBcel235:V:6279005:6280146:1 gene:K12B6.3 gene_biotype:protein_coding transcript_biotype:protein_coding	-	GO:0031224//intrinsic to membrane	GO:0016788//hydrolase activity, acting on ester bonds	GO:0006629//lipid metabolic process;GO:0010876//lipid localization	gi|17562542|ref|NP_504604.1|/0/Protein FIL-2 [Caenorhabditis elegans]
C49G7.10	936	97	426	9.17361	41.0755	2.16272	Up	8.79624e-52	5.02403e-50	cdna:known chromosome:WBcel235:V:4040409:4042004:-1 gene:C49G7.10 gene_biotype:protein_coding transcript_biotype:protein_coding	-	-	-	GO:0006952//defense response	gi|193207483|ref|NP_504126.2|/4.53394e-157/Protein C49G7.10 [Caenorhabditis elegans]
T01B11.4	947	8	35	0.747798	3.33555	2.1572	Up	1.9276e-05	0.000162503	cdna:known chromosome:WBcel235:IV:8459222:8460277:-1 gene:T01B11.4 gene_biotype:protein_coding transcript_biotype:protein_coding	K05863	GO:0019866//organelle inner membrane;GO:0031224//intrinsic to membrane;GO:0043231//intracellular membrane-bounded organelle	GO:0005488//binding;GO:0015216	GO:0002164//larval development;GO:0006897//endocytosis;GO:0006915//apoptotic process;GO:0006996//organelle organization;GO:0009790//embryo development;GO:0010259//multicellular organismal aging;GO:0040009//regulation of growth rate;GO:0042335//cuticle development;GO:0048729//tissue morphogenesis;GO:0048806//genitalia development	gi|17542128|ref|NP_501440.1|/3.67411e-154/Protein ANT-1.4 [Caenorhabditis elegans]
K08B4.3	1680	38	164	2.00225	8.81015	2.13754	Up	1.32902e-20	3.30482e-19	cdna:known chromosome:WBcel235:IV:6076690:6079945:-1 gene:K08B4.3 gene_biotype:protein_coding transcript_biotype:protein_coding	K00699	GO:0031224//intrinsic to membrane	GO:0005488//binding;GO:0016757//transferase activity, transferring glycosyl groups	GO:0030258//lipid modification	gi|71991138|ref|NP_500912.2|/0/Protein UGT-19 [Caenorhabditis elegans]
K03A1.6	326	8	34	2.17228	9.41261	2.11538	Up	3.20684e-05	0.000260495	cdna:known chromosome:WBcel235:X:7309564:7309889:-1 gene:K03A1.6 gene_biotype:protein_coding transcript_biotype:protein_coding	K11254	GO:0000785//chromatin;GO:0043231//intracellular membrane-bounded organelle	GO:0003677//DNA binding;GO:0046983//protein dimerization activity	GO:0002164//larval development;GO:0006351//transcription, DNA-dependent;GO:0006897//endocytosis;GO:0006950//response to stress;GO:0009790//embryo development;GO:0010876//lipid localization;GO:0010927;GO:0034728//nucleosome organization;GO:0040009//regulation of growth rate;GO:0046903//secretion;GO:0048565//digestive tract development;GO:0048806//genitalia development	gi|7439814|pir||S68537/2.91999e-39/histone H4 - starfish (Asterina pectinifera)
Y119D3B.21	336	820	3485	216.032	936.079	2.11538	Up	0	0	cdna:known chromosome:WBcel235:III:1214952:1215287:1 gene:Y119D3B.21 gene_biotype:protein_coding transcript_biotype:protein_coding	-	-	-	-	gi|17556759|ref|NP_497350.1|/3.6724e-18/Protein Y119D3B.21 [Caenorhabditis elegans]
Y38E10A.5	1292	53	225	3.63126	15.717	2.11378	Up	2.42852e-27	7.86987e-26	cdna:known chromosome:WBcel235:II:12578418:12581068:-1 gene:Y38E10A.5 gene_biotype:protein_coding transcript_biotype:protein_coding	K06560	-	-	-	gi|17537005|ref|NP_496688.1|/0/Protein CLEC-4 [Caenorhabditis elegans]
Y39B6A.27	1451	29	122	1.76919	7.58824	2.10068	Up	2.2116e-15	4.4714e-14	cdna:known chromosome:WBcel235:V:19031742:19035251:1 gene:Y39B6A.27 gene_biotype:protein_coding transcript_biotype:protein_coding	-	-	-	GO:0010876//lipid localization	gi|193209023|ref|NP_741671.2|/0/Protein Y39B6A.27 [Caenorhabditis elegans]
ZK6.11	1401	589	2446	37.2153	157.568	2.082	Up	3.68924e-275	9.11192e-273	cdna:known chromosome:WBcel235:V:415713:417706:-1 gene:ZK6.11 gene_biotype:protein_coding transcript_biotype:protein_coding	-	-	-	GO:0010259//multicellular organismal aging	gi|72001642|ref|NP_001024315.1|/0/Protein ZK6.11, isoform b [Caenorhabditis elegans]
M88.1	1709	205	831	10.6183	43.8842	2.04714	Up	9.99714e-93	9.51655e-91	cdna:known chromosome:WBcel235:III:4537277:4540637:-1 gene:M88.1 gene_biotype:protein_coding transcript_biotype:protein_coding	K00699	GO:0031224//intrinsic to membrane	GO:0005488//binding;GO:0016757//transferase activity, transferring glycosyl groups	GO:0030258//lipid modification;GO:0040009//regulation of growth rate	gi|17554280|ref|NP_497918.1|/0/Protein UGT-62 [Caenorhabditis elegans]
F49F1.5	528	96	388	16.0947	66.3203	2.04287	Up	4.29942e-44	2.18279e-42	cdna:known chromosome:WBcel235:IV:4119461:4120398:-1 gene:F49F1.5 gene_biotype:protein_coding transcript_biotype:protein_coding	-	-	-	-	gi|17540552|ref|NP_500486.1|/4.26014e-84/Protein F49F1.5 [Caenorhabditis elegans]
E02C12.8	1331	29	117	1.9287	7.93335	2.0403	Up	2.56842e-14	4.82456e-13	cdna:known chromosome:WBcel235:V:9371662:9373590:-1 gene:E02C12.8 gene_biotype:protein_coding transcript_biotype:protein_coding	-	-	GO:0016740//transferase activity	-	gi|71988327|ref|NP_001023762.1|/0/Protein E02C12.8, isoform c [Caenorhabditis elegans]
C49G9.2	508	12	48	2.09104	8.52759	2.02792	Up	1.36548e-06	1.33889e-05	cdna:known chromosome:WBcel235:I:12562814:12564210:1 gene:C49G9.2 gene_biotype:protein_coding transcript_biotype:protein_coding	-	-	-	-	gi|193202433|ref|NP_001122435.1|/2.80667e-47/Protein C49G9.2 [Caenorhabditis elegans]
F20G2.1	818	23	90	2.48897	9.92974	1.99621	Up	4.75716e-11	6.97806e-10	cdna:known chromosome:WBcel235:V:13752267:13753564:-1 gene:F20G2.1 gene_biotype:protein_coding transcript_biotype:protein_coding	K00079;K13368;K13369	-	GO:0003824//catalytic activity;GO:0036094//small molecule binding	GO:0044710	gi|17559962|ref|NP_506406.1|/9.15248e-129/Protein F20G2.1 [Caenorhabditis elegans]
ZK617.2	1035	68	265	5.81585	23.1076	1.9903	Up	1.19638e-29	4.20504e-28	cdna:known chromosome:WBcel235:IV:12014283:12015659:-1 gene:ZK617.2 gene_biotype:protein_coding transcript_biotype:protein_coding	-	-	-	-	gi|17544624|ref|NP_502276.1|/0/Protein LIPS-6 [Caenorhabditis elegans]
Y54G2A.6	923	278	1043	26.6617	101.984	1.9355	Up	9.01392e-108	9.74837e-106	cdna:known chromosome:WBcel235:IV:2854346:2855456:1 gene:Y54G2A.6 gene_biotype:protein_coding transcript_biotype:protein_coding	K06237	-	-	-	gi|17543574|ref|NP_500262.1|/3.16804e-163/Protein CLEC-85 [Caenorhabditis elegans]
C17F4.7	673	210	779	27.6216	104.465	1.91915	Up	4.66634e-80	3.82452e-78	cdna:known chromosome:WBcel235:II:3245087:3246015:-1 gene:C17F4.7 gene_biotype:protein_coding transcript_biotype:protein_coding	-	-	-	-	gi|17531927|ref|NP_494487.1|/5.49078e-101/Protein C17F4.7 [Caenorhabditis elegans]
C12D8.11	2036	1315	4835	57.1732	214.322	1.90637	Up	0	0	cdna:known chromosome:WBcel235:V:10252822:10255055:-1 gene:C12D8.11 gene_biotype:protein_coding transcript_biotype:protein_coding	K11089	GO:0032991//macromolecular complex	GO:0003676//nucleic acid binding	-	gi|17557834|ref|NP_505638.1|/0/Protein ROP-1 [Caenorhabditis elegans]
C14C6.5	566	1206	4406	188.615	702.549	1.89716	Up	0	0	cdna:known chromosome:WBcel235:V:536628:537418:1 gene:C14C6.5 gene_biotype:protein_coding transcript_biotype:protein_coding	-	-	-	-	gi|193207271|ref|NP_503238.2|/6.11128e-93/Protein C14C6.5 [Caenorhabditis elegans]
C34H4.2	1485	194	704	11.5643	42.7853	1.88744	Up	6.00026e-71	4.40429e-69	cdna:known chromosome:WBcel235:IV:1553790:1555567:1 gene:C34H4.2 gene_biotype:protein_coding transcript_biotype:protein_coding	-	-	-	-	gi|25148407|ref|NP_500096.2|/0/Protein C34H4.2 [Caenorhabditis elegans]
CD4.2	974	217	786	19.7217	72.8303	1.88475	Up	7.40966e-79	5.96592e-77	cdna:known chromosome:WBcel235:V:5594615:5595748:1 gene:CD4.2 gene_biotype:protein_coding transcript_biotype:protein_coding	K03424	-	GO:0004520//endodeoxyribonuclease activity	GO:0000737//DNA catabolic process, endonucleolytic;GO:0006909//phagocytosis;GO:0012501//programmed cell death	gi|17559024|ref|NP_504476.1|/3.12236e-164/Protein CRN-2 [Caenorhabditis elegans]
F46H5.6	2254	10	36	0.392727	1.44144	1.87592	Up	7.52136e-05	0.000569697	cdna:known chromosome:WBcel235:X:7267989:7272067:-1 gene:F46H5.6 gene_biotype:protein_coding transcript_biotype:protein_coding	-	-	GO:0005515//protein binding	GO:0002119//nematode larval development;GO:0035264//multicellular organism growth;GO:0042335//cuticle development;GO:0044763	gi|392926453|ref|NP_509224.3|/0/Protein GRD-7 [Caenorhabditis elegans]
T09F5.9	585	600	2148	90.7904	331.381	1.86788	Up	1.07906e-209	1.99212e-207	cdna:known chromosome:WBcel235:V:15175696:15176326:1 gene:T09F5.9 gene_biotype:protein_coding transcript_biotype:protein_coding	K06560;K06559;K10077	GO:0031224//intrinsic to membrane	-	GO:0010212//response to ionizing radiation;GO:0035264//multicellular organism growth;GO:0040009//regulation of growth rate	gi|17564166|ref|NP_506744.1|/9.05846e-90/Protein CLEC-47 [Caenorhabditis elegans]
Y41D4B.18	1362	35	125	2.27476	8.28289	1.86442	Up	1.18912e-13	2.12657e-12	cdna:pseudogene chromosome:WBcel235:IV:1558053:1559633:1 gene:Y41D4B.18 gene_biotype:pseudogene transcript_biotype:pseudogene	-	-	-	-	gi|17543308|ref|NP_500099.1|/3.88006e-127/Protein Y41D4B.17 [Caenorhabditis elegans]
F59B1.8	1326	55	196	3.67167	13.3402	1.86127	Up	1.52422e-20	3.77481e-19	cdna:known chromosome:WBcel235:V:3641858:3644249:-1 gene:F59B1.8 gene_biotype:protein_coding transcript_biotype:protein_coding	-	-	-	-	gi|25396374|pir||G89007/0/protein F59B1.8 [imported] - Caenorhabditis elegans
ZK6.10	1400	554	1971	35.0289	127.06	1.85889	Up	2.49806e-191	4.3901e-189	cdna:known chromosome:WBcel235:V:411779:414760:-1 gene:ZK6.10 gene_biotype:protein_coding transcript_biotype:protein_coding	-	-	-	GO:0010259//multicellular organismal aging	gi|17566768|ref|NP_503193.1|/0/Protein DOD-19 [Caenorhabditis elegans]
C25F9.7	528	29	103	4.86193	17.6057	1.85644	Up	1.96768e-11	2.98947e-10	cdna:known chromosome:WBcel235:V:19400142:19400715:-1 gene:C25F9.7 gene_biotype:protein_coding transcript_biotype:protein_coding	-	-	-	-	gi|193207357|ref|NP_507775.2|/3.36726e-44/Protein SRW-86 [Caenorhabditis elegans]
R02D3.8	901	96	339	9.43172	33.9566	1.8481	Up	4.32396e-34	1.75231e-32	cdna:known chromosome:WBcel235:IV:255967:257199:-1 gene:R02D3.8 gene_biotype:protein_coding transcript_biotype:protein_coding	K01175	GO:0044464//cell part	GO:0004518//nuclease activity;GO:0097159//organic cyclic compound binding	-	gi|17541752|ref|NP_499887.1|/8.01623e-156/Protein R02D3.8 [Caenorhabditis elegans]
C16C4.4	1074	36	126	2.96717	10.588	1.83527	Up	1.7297e-13	3.04271e-12	cdna:known chromosome:WBcel235:II:1869410:1870797:1 gene:C16C4.4 gene_biotype:protein_coding transcript_biotype:protein_coding	-	-	-	GO:0040011//locomotion	gi|392889232|ref|NP_001254043.1|/9.43029e-126/Protein MATH-14, isoform b [Caenorhabditis elegans]
B0213.17	260	72	248	24.5134	86.0849	1.81219	Up	9.9193e-25	2.95269e-23	cdna:known chromosome:WBcel235:V:3978829:3979134:-1 gene:B0213.17 gene_biotype:protein_coding transcript_biotype:protein_coding	-	-	-	-	-
Y39B6A.23	1188	27	92	2.01183	6.98908	1.79659	Up	5.8016e-10	7.96065e-09	cdna:known chromosome:WBcel235:V:19039058:19042605:-1 gene:Y39B6A.23 gene_biotype:protein_coding transcript_biotype:protein_coding	K06002;K01382;K01377	-	GO:0004175//endopeptidase activity	GO:0009057//macromolecule catabolic process;GO:0016265//death;GO:0019538//protein metabolic process	gi|25155274|ref|NP_741674.1|/0/Protein ASP-16 [Caenorhabditis elegans]
ZC47.14	998	39	132	3.45922	11.9369	1.78691	Up	1.30766e-13	2.32491e-12	cdna:known chromosome:WBcel235:III:1285016:1287140:1 gene:ZC47.14 gene_biotype:protein_coding transcript_biotype:protein_coding	-	-	-	-	gi|17556787|ref|NP_497370.1|/2.03895e-166/Protein FBXA-37 [Caenorhabditis elegans]
Y22F5A.4	1107	3794	12838	303.385	1046.64	1.78655	Up	0	0	cdna:known chromosome:WBcel235:V:10277904:10279127:1 gene:Y22F5A.4 gene_biotype:protein_coding transcript_biotype:protein_coding	-	-	GO:0005488//binding	GO:0042742//defense response to bacterium;GO:0044238//primary metabolic process	gi|17565328|ref|NP_505642.1|/6.7806e-161/Protein LYS-1 [Caenorhabditis elegans]
ZK829.3	1367	15	50	0.971331	3.30104	1.76488	Up	7.05412e-06	6.33554e-05	cdna:known chromosome:WBcel235:IV:11943325:11945721:-1 gene:ZK829.3 gene_biotype:protein_coding transcript_biotype:protein_coding	-	-	-	-	gi|193207051|ref|NP_502264.2|/0/Protein ZK829.3 [Caenorhabditis elegans]
K09D9.2	1568	13	43	0.733908	2.47498	1.75374	Up	3.45598e-05	0.00027826	cdna:known chromosome:WBcel235:V:4022619:4024473:1 gene:K09D9.2 gene_biotype:protein_coding transcript_biotype:protein_coding	K07413;K07416;K00493;K07417	-	GO:0016491//oxidoreductase activity;GO:0046906//tetrapyrrole binding;GO:0046914//transition metal ion binding	GO:0010876//lipid localization;GO:0042221//response to chemical stimulus;GO:0044710	gi|17562424|ref|NP_504121.1|/0/Protein CYP-35A3 [Caenorhabditis elegans]
Y46G5A.19	1496	135	442	7.98816	26.6649	1.73901	Up	1.54285e-40	7.06733e-39	cdna:known chromosome:WBcel235:II:12806848:12810795:1 gene:Y46G5A.19 gene_biotype:protein_coding transcript_biotype:protein_coding	K00797	GO:0044444//cytoplasmic part	GO:0016740//transferase activity;GO:0016765//transferase activity, transferring alkyl or aryl (other than methyl) groups;GO:0042802//identical protein binding	GO:0006596//polyamine biosynthetic process;GO:0008152//metabolic process;GO:0044710	gi|25154106|ref|NP_496723.2|/5.80558e-174/Protein SPDS-1, isoform a [Caenorhabditis elegans]
K01D12.11	933	199	644	18.8806	62.295	1.72221	Up	1.58858e-57	9.87568e-56	cdna:known chromosome:WBcel235:V:12407364:12408592:-1 gene:K01D12.11 gene_biotype:protein_coding transcript_biotype:protein_coding	-	GO:0000323//lytic vacuole;GO:0031224//intrinsic to membrane	-	GO:0010038//response to metal ion;GO:0010259//multicellular organismal aging;GO:0010388//cullin deneddylation;GO:0040009//regulation of growth rate	gi|17562064|ref|NP_506110.1|/1.01475e-140/Protein CDR-4 [Caenorhabditis elegans]
F36A4.6	942	14	45	1.31559	4.31132	1.71242	Up	3.06762e-05	0.000250187	cdna:known chromosome:WBcel235:IV:4263341:4265202:1 gene:F36A4.6 gene_biotype:protein_coding transcript_biotype:protein_coding	-	-	-	GO:0044699;GO:0048856//anatomical structure development	gi|71987869|ref|NP_500524.2|/8.70113e-39/Protein COL-33 [Caenorhabditis elegans]
C29F9.4	951	308	981	28.6691	93.0973	1.69924	Up	4.19092e-85	3.71832e-83	cdna:known chromosome:WBcel235:III:120492:124686:1 gene:C29F9.4 gene_biotype:protein_coding transcript_biotype:protein_coding	K10352	-	-	-	gi|115534034|ref|NP_497146.2|/8.16745e-170/Protein C29F9.4 [Caenorhabditis elegans]
K09D9.1	901	22	70	2.16144	7.01168	1.69777	Up	2.1413e-07	2.32679e-06	cdna:known chromosome:WBcel235:V:4025091:4026204:1 gene:K09D9.1 gene_biotype:protein_coding transcript_biotype:protein_coding	-	-	-	GO:0006952//defense response	gi|17562422|ref|NP_504122.1|/3.03911e-163/Protein K09D9.1 [Caenorhabditis elegans]
T04H1.9	1388	24	76	1.53062	4.94166	1.69088	Up	6.98072e-08	8.01927e-07	cdna:known chromosome:WBcel235:V:12261804:12263368:1 gene:T04H1.9 gene_biotype:protein_coding transcript_biotype:protein_coding	K07375	GO:0005856//cytoskeleton;GO:0032991//macromolecular complex	GO:0036094//small molecule binding;GO:0097159//organic cyclic compound binding;GO:1901363	GO:0009987//cellular process	gi|72000327|ref|NP_506075.2|/0/Protein TBB-6 [Caenorhabditis elegans]
T16G1.6	1370	81	255	5.2337	16.7984	1.68242	Up	4.91318e-23	1.35035e-21	cdna:known chromosome:WBcel235:V:12935536:12937187:-1 gene:T16G1.6 gene_biotype:protein_coding transcript_biotype:protein_coding	-	-	GO:0016740//transferase activity	-	gi|72000569|ref|NP_506234.2|/0/Protein T16G1.6 [Caenorhabditis elegans]
F37B4.7	1647	576	1791	30.958	98.1411	1.66454	Up	1.99576e-149	2.98987e-147	cdna:known chromosome:WBcel235:V:2872465:2875600:-1 gene:F37B4.7 gene_biotype:protein_coding transcript_biotype:protein_coding	K14610	GO:0031224//intrinsic to membrane	GO:0015291//secondary active transmembrane transporter activity;GO:0019842//vitamin binding	GO:0051234//establishment of localization	gi|17560684|ref|NP_503780.1|/0/Protein FOLT-2 [Caenorhabditis elegans]
ZK1320.3	696	988	3033	125.659	393.289	1.64608	Up	1.05056e-247	2.28585e-245	cdna:known chromosome:WBcel235:II:9659243:9660442:-1 gene:ZK1320.3 gene_biotype:protein_coding transcript_biotype:protein_coding	-	-	-	-	gi|17538141|ref|NP_496084.1|/5.73569e-120/Protein ZK1320.3 [Caenorhabditis elegans]
F32G8.3	390	25	75	5.6744	17.3558	1.61288	Up	2.24294e-07	2.43289e-06	cdna:known chromosome:WBcel235:V:10554616:10555238:-1 gene:F32G8.3 gene_biotype:protein_coding transcript_biotype:protein_coding	-	-	-	-	gi|17560480|ref|NP_505707.1|/6.3862e-26/Protein F32G8.3 [Caenorhabditis elegans]
Y113G7C.1	4530	15	45	0.293115	0.896526	1.61288	Up	6.47606e-05	0.000496073	cdna:known chromosome:WBcel235:V:20317837:20324011:1 gene:Y113G7C.1 gene_biotype:protein_coding transcript_biotype:protein_coding	K04458;K01104	GO:0015630//microtubule cytoskeleton;GO:0031224//intrinsic to membrane	GO:0032550;GO:0042578//phosphoric ester hydrolase activity	GO:0006464//cellular protein modification process;GO:0006796//phosphate-containing compound metabolic process;GO:0009790//embryo development;GO:0044763	gi|17566500|ref|NP_507918.1|/0/Protein Y113G7C.1 [Caenorhabditis elegans]
C26B2.8	1122	16	48	1.26233	3.86098	1.61288	Up	3.6537e-05	0.000292889	cdna:known chromosome:WBcel235:IV:8014128:8015637:1 gene:C26B2.8 gene_biotype:protein_coding transcript_biotype:protein_coding	-	-	-	-	gi|17538800|ref|NP_501341.1|/0/Protein C26B2.8 [Caenorhabditis elegans]
Y87G2A.5	3568	1855	5540	46.0218	140.131	1.60639	Up	0	0	cdna:known chromosome:WBcel235:I:13548074:13559361:-1 gene:Y87G2A.5 gene_biotype:protein_coding transcript_biotype:protein_coding	K01873	GO:0044424//intracellular part	GO:0004812//aminoacyl-tRNA ligase activity;GO:0032550;GO:0052689	GO:0002164//larval development;GO:0006418//tRNA aminoacylation for protein translation;GO:0006448//regulation of translational elongation;GO:0006897//endocytosis;GO:0009790//embryo development;GO:0012501//programmed cell death;GO:0035264//multicellular organism growth;GO:0040009//regulation of growth rate;GO:0042303//molting cycle	gi|17510661|ref|NP_493377.1|/0/Protein VARS-2 [Caenorhabditis elegans]
F35C5.9	1266	122	363	8.53042	25.8775	1.60101	Up	4.93928e-30	1.76319e-28	cdna:known chromosome:WBcel235:II:12904400:12906607:1 gene:F35C5.9 gene_biotype:protein_coding transcript_biotype:protein_coding	-	-	GO:0005488//binding	-	gi|17533689|ref|NP_496746.1|/0/Protein CLEC-66 [Caenorhabditis elegans]
F53F4.7	1120	22	65	1.7388	5.23774	1.59085	Up	1.85721e-06	1.79314e-05	cdna:known chromosome:WBcel235:V:13612414:13613979:-1 gene:F53F4.7 gene_biotype:protein_coding transcript_biotype:protein_coding	-	-	-	-	gi|17561324|ref|NP_506372.1|/0/Protein F53F4.7 [Caenorhabditis elegans]
E04D5.4	647	59	174	8.0722	24.2713	1.58822	Up	5.02556e-15	9.95148e-14	cdna:known chromosome:WBcel235:II:10440286:10442515:1 gene:E04D5.4 gene_biotype:protein_coding transcript_biotype:protein_coding	-	-	-	-	gi|392891484|ref|NP_001254246.1|/3.67566e-42/Protein E04D5.4, isoform a [Caenorhabditis elegans]
Y11D7A.11	1015	17	50	1.48261	4.44583	1.58431	Up	3.16794e-05	0.00025745	cdna:known chromosome:WBcel235:IV:9260610:9261767:-1 gene:Y11D7A.11 gene_biotype:protein_coding transcript_biotype:protein_coding	-	-	-	-	gi|17542966|ref|NP_501617.1|/8.15096e-78/Protein COL-120 [Caenorhabditis elegans]
T08E11.7	951	26	76	2.42012	7.21243	1.57541	Up	2.97804e-07	3.19798e-06	cdna:known chromosome:WBcel235:II:1818889:1820002:-1 gene:T08E11.7 gene_biotype:protein_coding transcript_biotype:protein_coding	-	-	-	-	gi|115533810|ref|NP_494084.2|/1.59768e-157/Protein FBXA-3 [Caenorhabditis elegans]
C29F9.3	942	328	958	30.8225	91.7832	1.57425	Up	1.0918e-74	8.3493e-73	cdna:known chromosome:WBcel235:III:124791:126419:1 gene:C29F9.3 gene_biotype:protein_coding transcript_biotype:protein_coding	-	-	-	-	gi|25144936|ref|NP_741063.1|/1.4757e-159/Protein C29F9.3, isoform c [Caenorhabditis elegans]
Y54E2A.4	6454	1104	3214	15.142	44.9434	1.56955	Up	5.13866e-245	1.09208e-242	cdna:known chromosome:WBcel235:II:14754669:14778137:1 gene:Y54E2A.4 gene_biotype:protein_coding transcript_biotype:protein_coding	K01529	-	GO:0004386//helicase activity;GO:0032550;GO:0042623//ATPase activity, coupled	GO:0006259//DNA metabolic process;GO:0006974//response to DNA damage stimulus	gi|392892583|ref|NP_497060.2|/0/Protein Y54E2A.4 [Caenorhabditis elegans]
F26D11.2	1216	39	113	2.83907	8.38675	1.5627	Up	4.83854e-10	6.67426e-09	cdna:known chromosome:WBcel235:V:7959270:7960958:1 gene:F26D11.2 gene_biotype:protein_coding transcript_biotype:protein_coding	-	-	-	-	gi|17560224|ref|NP_505049.1|/0/Protein F26D11.2 [Caenorhabditis elegans]
C34H4.3	1328	168	486	11.1984	33.0284	1.56041	Up	2.90046e-38	1.27126e-36	cdna:known chromosome:WBcel235:IV:1550929:1553046:1 gene:C34H4.3 gene_biotype:protein_coding transcript_biotype:protein_coding	-	-	-	-	gi|17539046|ref|NP_500095.1|/0/Protein TAG-244 [Caenorhabditis elegans]
F26A1.8	1218	20	57	1.45354	4.22354	1.53888	Up	1.33444e-05	0.000114937	cdna:known chromosome:WBcel235:III:4820798:4822226:-1 gene:F26A1.8 gene_biotype:protein_coding transcript_biotype:protein_coding	-	GO:0031224//intrinsic to membrane	-	-	gi|17553174|ref|NP_497997.1|/0/Protein F26A1.8 [Caenorhabditis elegans]
R11G11.2	1311	222	630	14.9898	43.3697	1.53271	Up	7.12504e-48	3.83013e-46	cdna:known chromosome:WBcel235:V:532289:534047:1 gene:R11G11.2 gene_biotype:protein_coding transcript_biotype:protein_coding	-	GO:0043231//intracellular membrane-bounded organelle	GO:0001071//nucleic acid binding transcription factor activity;GO:0003677//DNA binding;GO:0038023//signaling receptor activity;GO:0046914//transition metal ion binding	GO:0006351//transcription, DNA-dependent;GO:0009755//hormone-mediated signaling pathway;GO:0009790//embryo development	gi|17562756|ref|NP_503236.1|/0/Protein NHR-58, isoform a [Caenorhabditis elegans]
F43E2.8	2216	1302	3691	52.0099	150.322	1.5312	Up	4.01904e-271	9.53974e-269	cdna:known chromosome:WBcel235:II:7350119:7352636:-1 gene:F43E2.8 gene_biotype:protein_coding transcript_biotype:protein_coding	K09490	GO:0043234//protein complex;GO:0044432//endoplasmic reticulum part	GO:0017111//nucleoside-triphosphatase activity;GO:0032550	GO:0002164//larval development;GO:0006984//ER-nucleus signaling pathway;GO:0009154//purine ribonucleotide catabolic process;GO:0009653//anatomical structure morphogenesis;GO:0009790//embryo development;GO:0010876//lipid localization;GO:0012501//programmed cell death;GO:0015031//protein transport;GO:0040009//regulation of growth rate;GO:0044267//cellular protein metabolic process	gi|17534771|ref|NP_495536.1|/0/Protein HSP-4 [Caenorhabditis elegans]
F45F2.13	411	18	51	3.87682	11.1989	1.53042	Up	4.1587e-05	0.000331336	cdna:known chromosome:WBcel235:V:8534567:8534977:-1 gene:F45F2.13 gene_biotype:protein_coding transcript_biotype:protein_coding	K11253	GO:0000785//chromatin;GO:0043231//intracellular membrane-bounded organelle	GO:0003676//nucleic acid binding;GO:0046983//protein dimerization activity	GO:0002164//larval development;GO:0009653//anatomical structure morphogenesis;GO:0009790//embryo development;GO:0034728//nucleosome organization;GO:0040009//regulation of growth rate;GO:0048565//digestive tract development	gi|17532993|ref|NP_496899.1|/2.05633e-69/Protein HIS-42 [Caenorhabditis elegans]
K01H12.2	1012	16	45	1.39954	4.01311	1.51977	Up	0.000130363	0.000951532	cdna:known chromosome:WBcel235:IV:9708191:9709302:-1 gene:K01H12.2 gene_biotype:protein_coding transcript_biotype:protein_coding	K01;K05863	GO:0019866//organelle inner membrane;GO:0031224//intrinsic to membrane;GO:0043231//intracellular membrane-bounded organelle	GO:0005488//binding;GO:0015216	GO:0002164//larval development;GO:0006897//endocytosis;GO:0006915//apoptotic process;GO:0006996//organelle organization;GO:0009790//embryo development;GO:0010259//multicellular organismal aging;GO:0040009//regulation of growth rate;GO:0042335//cuticle development;GO:0048729//tissue morphogenesis;GO:0048806//genitalia development	gi|17541180|ref|NP_501727.1|/5.13649e-157/Protein ANT-1.3 [Caenorhabditis elegans]
F17C11.11	983	336	938	30.2573	86.1188	1.50905	Up	7.2688e-69	5.20988e-67	cdna:known chromosome:WBcel235:V:10937633:10938840:-1 gene:F17C11.11 gene_biotype:protein_coding transcript_biotype:protein_coding	K15414	-	-	-	gi|392920566|ref|NP_001256278.1|/4.18036e-150/Protein F17C11.11, isoform a [Caenorhabditis elegans]
ZC487.4	997	19	53	1.68695	4.79766	1.50791	Up	3.56296e-05	0.000286243	cdna:known chromosome:WBcel235:V:6730281:6731694:-1 gene:ZC487.4 gene_biotype:protein_coding transcript_biotype:protein_coding	-	-	GO:0016491//oxidoreductase activity	GO:0040009//regulation of growth rate	gi|17566728|ref|NP_504706.1|/5.61735e-124/Protein GRL-9 [Caenorhabditis elegans]
F35C5.8	1195	1348	3726	99.8542	281.4	1.49473	Up	3.76934e-264	8.72054e-262	cdna:known chromosome:WBcel235:II:12901325:12903335:1 gene:F35C5.8 gene_biotype:protein_coding transcript_biotype:protein_coding	-	-	GO:0005488//binding	-	gi|17533687|ref|NP_496745.1|/0/Protein CLEC-65 [Caenorhabditis elegans]
Y41G9A.10	725	797	2195	97.3116	273.241	1.48949	Up	1.22231e-155	1.89323e-153	cdna:known chromosome:WBcel235:X:2945803:2946570:-1 gene:Y41G9A.10 gene_biotype:protein_coding transcript_biotype:protein_coding	-	-	-	-	gi|133901998|ref|NP_001076775.1|/3.99306e-10/Protein Y41G9A.10 [Caenorhabditis elegans]
M60.2	1948	627	1721	28.492	79.7335	1.48463	Up	7.27578e-122	9.171e-120	cdna:known chromosome:WBcel235:X:8242301:8247882:1 gene:M60.2 gene_biotype:protein_coding transcript_biotype:protein_coding	K14648	-	GO:0016787//hydrolase activity	GO:0006950//response to stress	gi|17569005|ref|NP_509391.1|/0/Protein M60.2 [Caenorhabditis elegans]
F35A5.4	1712	23	63	1.18924	3.32113	1.48164	Up	8.39434e-06	7.44051e-05	cdna:known chromosome:WBcel235:X:3789757:3792815:-1 gene:F35A5.4 gene_biotype:protein_coding transcript_biotype:protein_coding	-	-	-	-	gi|71989228|ref|NP_508657.2|/0/Protein F35A5.4 [Caenorhabditis elegans]
ZK355.3	574	57	156	8.79037	24.528	1.48043	Up	1.99401e-12	3.27738e-11	cdna:known chromosome:WBcel235:II:2927017:2927633:-1 gene:ZK355.3 gene_biotype:protein_coding transcript_biotype:protein_coding	-	-	-	-	gi|17537859|ref|NP_494401.1|/2.5175e-97/Protein ZK355.3 [Caenorhabditis elegans]
C52E12.1	3070	761	2071	21.9427	60.8822	1.47228	Up	1.81699e-144	2.59446e-142	cdna:known chromosome:WBcel235:II:7025802:7030162:1 gene:C52E12.1 gene_biotype:protein_coding transcript_biotype:protein_coding	K14859	-	-	-	gi|32565518|ref|NP_495439.2|/0/Protein C52E12.1 [Caenorhabditis elegans]
C16A3.7	3540	716	1948	17.9042	49.6632	1.47188	Up	5.99348e-136	8.05462e-134	cdna:known chromosome:WBcel235:III:6375379:6379177:1 gene:C16A3.7 gene_biotype:protein_coding transcript_biotype:protein_coding	K12236	GO:0043231//intracellular membrane-bounded organelle	GO:0046914//transition metal ion binding;GO:0097159//organic cyclic compound binding	GO:0006351//transcription, DNA-dependent	gi|17552206|ref|NP_498394.1|/0/Protein NFX-1 [Caenorhabditis elegans]
Y58A7A.2	483	24	65	4.39854	12.1455	1.46532	Up	7.16038e-06	6.4215e-05	cdna:known chromosome:WBcel235:V:5071699:5072231:-1 gene:Y58A7A.2 gene_biotype:protein_coding transcript_biotype:protein_coding	-	-	-	-	gi|17566030|ref|NP_504359.1|/6.1596e-51/Protein Y58A7A.2 [Caenorhabditis elegans]
T12B5.10	1169	175	472	13.2516	36.4398	1.45935	Up	7.40458e-34	2.9941e-32	cdna:known chromosome:WBcel235:III:944780:946292:-1 gene:T12B5.10 gene_biotype:protein_coding transcript_biotype:protein_coding	-	-	-	-	gi|17555038|ref|NP_497300.1|/0/Protein FBXA-60 [Caenorhabditis elegans]
F31D5.5	5564	46	124	0.731838	2.01133	1.45855	Up	5.71026e-10	7.8412e-09	cdna:known chromosome:WBcel235:II:4194833:4204147:-1 gene:F31D5.5 gene_biotype:protein_coding transcript_biotype:protein_coding	-	GO:0031224//intrinsic to membrane	-	-	gi|71987875|ref|NP_494739.2|/0/Protein MTH-1 [Caenorhabditis elegans]
F10F2.9	1663	19	51	1.01136	2.76775	1.45242	Up	8.05318e-05	0.000607713	cdna:known chromosome:WBcel235:III:4643999:4646346:-1 gene:F10F2.9 gene_biotype:protein_coding transcript_biotype:protein_coding	-	-	-	-	gi|17553036|ref|NP_497948.1|/4.63683e-80/Protein PQN-29 [Caenorhabditis elegans]
Y41D4B.16	1483	640	1712	38.2017	104.186	1.44746	Up	8.51068e-117	1.02335e-114	cdna:known chromosome:WBcel235:IV:1562184:1564076:1 gene:Y41D4B.16 gene_biotype:protein_coding transcript_biotype:protein_coding	-	-	-	-	gi|17543306|ref|NP_500100.1|/0/Protein HPO-6 [Caenorhabditis elegans]
ZC84.1	4774	36	96	0.66752	1.81484	1.44296	Up	6.5004e-08	7.50523e-07	cdna:known chromosome:WBcel235:III:9199945:9206252:-1 gene:ZC84.1 gene_biotype:protein_coding transcript_biotype:protein_coding	K00924	-	GO:0004866//endopeptidase inhibitor activity	-	gi|392896014|ref|NP_499036.3|/0/Protein ZC84.1 [Caenorhabditis elegans]
F22G12.1	1173	61	161	4.60337	12.3873	1.4281	Up	3.46998e-12	5.58774e-11	cdna:known chromosome:WBcel235:I:13139132:13141894:1 gene:F22G12.1 gene_biotype:protein_coding transcript_biotype:protein_coding	K10352;K06267;K10357	-	-	-	gi|115533775|ref|NP_493302.2|/0/Protein F22G12.1 [Caenorhabditis elegans]
Y43F11A.6	1118	22	58	1.74191	4.68204	1.42647	Up	3.28864e-05	0.000266193	cdna:pseudogene chromosome:WBcel235:II:12131530:12132894:-1 gene:Y43F11A.6 gene_biotype:pseudogene transcript_biotype:pseudogene	-	-	-	-	gi|563403353|emb|CCD61295.2|/1.58794e-32/Protein B0205.1, isoform b [Caenorhabditis elegans]
T27F6.2	1304	27	71	1.83287	4.91394	1.42278	Up	4.39846e-06	4.06219e-05	cdna:known chromosome:WBcel235:I:12476647:12478588:-1 gene:T27F6.2 gene_biotype:protein_coding transcript_biotype:protein_coding	K09608;K13912	-	-	GO:0040009//regulation of growth rate	gi|17509297|ref|NP_493166.1|/0/Protein CLEC-12 [Caenorhabditis elegans]
F33A8.10	923	29	76	2.78125	7.43123	1.41787	Up	2.1367e-06	2.05539e-05	cdna:known chromosome:WBcel235:II:11036186:11039471:1 gene:F33A8.10 gene_biotype:protein_coding transcript_biotype:protein_coding	-	-	-	-	gi|71988024|ref|NP_001022136.1|/1.09899e-131/Protein F33A8.10 [Caenorhabditis elegans]
ZK1025.9	1129	21	55	1.64653	4.39661	1.41696	Up	5.77622e-05	0.000447718	cdna:known chromosome:WBcel235:I:11473218:11475662:-1 gene:ZK1025.9 gene_biotype:protein_coding transcript_biotype:protein_coding	K08703	GO:0043231//intracellular membrane-bounded organelle	GO:0003677//DNA binding;GO:0038023//signaling receptor activity;GO:0046914//transition metal ion binding	GO:0006351//transcription, DNA-dependent;GO:0009755//hormone-mediated signaling pathway;GO:0040009//regulation of growth rate	gi|28396077|gb|AAO39200.1|/0/nuclear receptor NHR-113 [Caenorhabditis elegans]
AC3.7	1711	32	83	1.65556	4.37801	1.40296	Up	8.81202e-07	8.88347e-06	cdna:known chromosome:WBcel235:V:10395677:10397817:1 gene:AC3.7 gene_biotype:protein_coding transcript_biotype:protein_coding	K00699	GO:0031224//intrinsic to membrane	GO:0005488//binding;GO:0016757//transferase activity, transferring glycosyl groups	GO:0010259//multicellular organismal aging;GO:0030258//lipid modification;GO:0040009//regulation of growth rate	gi|17557176|ref|NP_505671.1|/0/Protein UGT-1 [Caenorhabditis elegans]
F20E11.17	216	26	67	10.6553	27.9943	1.39357	Up	1.13626e-05	9.87987e-05	cdna:known chromosome:WBcel235:V:17468754:17469251:-1 gene:F20E11.17 gene_biotype:protein_coding transcript_biotype:protein_coding	-	-	-	-	gi|392922559|ref|NP_001122925.2|/2.1306e-29/Protein F20E11.17 [Caenorhabditis elegans]
K02D7.4	2851	1457	3751	45.2383	118.74	1.39219	Up	3.65588e-239	7.42428e-237	cdna:known chromosome:WBcel235:IV:315053:320576:-1 gene:K02D7.4 gene_biotype:protein_coding transcript_biotype:protein_coding	K02;K14463	-	-	GO:0003006//developmental process involved in reproduction	gi|71990799|ref|NP_499903.3|/0/Protein DSC-4 [Caenorhabditis elegans]
C27H5.5	1102	539	1384	43.2964	113.345	1.38841	Up	4.13074e-89	3.7561e-87	cdna:known chromosome:WBcel235:II:7167513:7168662:-1 gene:C27H5.5 gene_biotype:protein_coding transcript_biotype:protein_coding	-	-	-	-	gi|17532623|ref|NP_495487.1|/3.43829e-56/Protein COL-36 [Caenorhabditis elegans]
Y45G5AM.3	1233	161	410	11.5587	30.0102	1.37648	Up	2.94982e-27	9.52542e-26	cdna:known chromosome:WBcel235:V:4164844:4166758:1 gene:Y45G5AM.3 gene_biotype:protein_coding transcript_biotype:protein_coding	-	-	-	-	gi|453232376|ref|NP_504159.2|/0/Protein Y45G5AM.3 [Caenorhabditis elegans]
ZK355.8	285	96	244	29.8175	77.2669	1.37369	Up	8.52372e-17	1.84583e-15	cdna:known chromosome:WBcel235:II:2927813:2928149:1 gene:ZK355.8 gene_biotype:protein_coding transcript_biotype:protein_coding	-	-	-	-	gi|212645669|ref|NP_001129832.1|/2.31745e-28/Protein ZK355.8 [Caenorhabditis elegans]
F21D5.3	2418	391	993	14.3141	37.0631	1.37254	Up	2.31602e-63	1.55055e-61	cdna:known chromosome:WBcel235:IV:8730721:8735685:1 gene:F21D5.3 gene_biotype:protein_coding transcript_biotype:protein_coding	K00540	-	GO:0003824//catalytic activity;GO:0046914//transition metal ion binding	GO:0044710	gi|392899757|ref|NP_001255322.1|/3.32638e-150/Protein F21D5.3, isoform b [Caenorhabditis elegans]
M01G12.9	1956	137	347	6.20006	16.0107	1.36868	Up	4.01058e-23	1.10394e-21	cdna:known chromosome:WBcel235:I:12109061:12112513:-1 gene:M01G12.9 gene_biotype:protein_coding transcript_biotype:protein_coding	K03120;K15172;K15193	-	-	-	gi|392887361|ref|NP_493059.2|/0/Protein M01G12.9 [Caenorhabditis elegans]
C29F3.7	1720	127	320	6.53611	16.7908	1.36116	Up	2.80732e-21	7.15612e-20	cdna:known chromosome:WBcel235:V:15354833:15357572:1 gene:C29F3.7 gene_biotype:protein_coding transcript_biotype:protein_coding	-	-	-	-	gi|32567017|ref|NP_741643.2|/0/Protein C29F3.7, isoform a [Caenorhabditis elegans]
Y46G5A.20	529	79	199	13.2195	33.9505	1.36076	Up	8.65044e-14	1.55921e-12	cdna:known chromosome:WBcel235:II:12811037:12811931:1 gene:Y46G5A.20 gene_biotype:protein_coding transcript_biotype:protein_coding	-	-	GO:0005488//binding	-	gi|17537155|ref|NP_496724.1|/1.73742e-24/Protein Y46G5A.20 [Caenorhabditis elegans]
C52D10.1	1299	125	312	8.51815	21.6768	1.34754	Up	1.72056e-20	4.25531e-19	cdna:known chromosome:WBcel235:IV:17186910:17189806:1 gene:C52D10.1 gene_biotype:protein_coding transcript_biotype:protein_coding	-	-	GO:0005488//binding	-	gi|115534513|ref|NP_503050.2|/1.96421e-165/Protein C52D10.1 [Caenorhabditis elegans]
F55G11.4	1083	281	701	22.968	58.4169	1.34676	Up	5.36026e-44	2.70634e-42	cdna:known chromosome:WBcel235:IV:12973636:12975597:1 gene:F55G11.4 gene_biotype:protein_coding transcript_biotype:protein_coding	-	-	-	-	gi|17540686|ref|NP_502485.1|/0/Protein F55G11.4 [Caenorhabditis elegans]
C24G7.2	1986	46	114	2.05033	5.18053	1.33725	Up	2.65794e-08	3.1939e-07	cdna:known chromosome:WBcel235:I:4103713:4108045:1 gene:C24G7.2 gene_biotype:protein_coding transcript_biotype:protein_coding	K04832;K04831	GO:0031224//intrinsic to membrane	GO:0005261//cation channel activity	GO:0006814//sodium ion transport;GO:0007409//axonogenesis;GO:0042221//response to chemical stimulus	gi|71980907|ref|NP_491295.2|/0/Protein ACD-1 [Caenorhabditis elegans]
Y43F8B.14	1976	24	59	1.07515	2.69472	1.3256	Up	7.44992e-05	0.000565223	cdna:known chromosome:WBcel235:V:19452183:19455969:-1 gene:Y43F8B.14 gene_biotype:protein_coding transcript_biotype:protein_coding	K15173	-	-	-	gi|17565672|ref|NP_507785.1|/0/Protein Y43F8B.14 [Caenorhabditis elegans]
F18F11.4	1837	29	71	1.39744	3.48817	1.31968	Up	1.45185e-05	0.000124521	cdna:known chromosome:WBcel235:IV:330860:334399:1 gene:F18F11.4 gene_biotype:protein_coding transcript_biotype:protein_coding	-	-	-	-	gi|115534282|ref|NP_499906.3|/0/Protein F18F11.4 [Caenorhabditis elegans]
R08F11.3	1585	155	379	8.65659	21.5804	1.31785	Up	8.76856e-24	2.51196e-22	cdna:known chromosome:WBcel235:V:3800776:3803454:-1 gene:R08F11.3 gene_biotype:protein_coding transcript_biotype:protein_coding	K07418;K00493	GO:0031224//intrinsic to membrane	GO:0016491//oxidoreductase activity;GO:0046906//tetrapyrrole binding;GO:0046914//transition metal ion binding	GO:0040009//regulation of growth rate;GO:0044710	gi|17562980|ref|NP_504051.1|/0/Protein CYP-33C8 [Caenorhabditis elegans]
R09B5.3	358	216	528	53.4091	133.107	1.31743	Up	1.72937e-32	6.73937e-31	cdna:known chromosome:WBcel235:V:1449667:1450189:-1 gene:R09B5.3 gene_biotype:protein_coding transcript_biotype:protein_coding	-	-	-	-	-
Y46H3A.3	592	25	61	3.7382	9.29944	1.3148	Up	6.23728e-05	0.000478986	cdna:known chromosome:WBcel235:V:1804334:1804971:-1 gene:Y46H3A.3 gene_biotype:protein_coding transcript_biotype:protein_coding	K09542	GO:0031985//Golgi cisterna	GO:0003676//nucleic acid binding;GO:0034061	GO:0006260//DNA replication;GO:0006950//response to stress;GO:0006984//ER-nucleus signaling pathway;GO:0040009//regulation of growth rate	gi|17562028|ref|NP_503507.1|/4.89866e-75/Protein HSP-16.2 [Caenorhabditis elegans]
C23H5.9	735	23	56	2.77003	6.87622	1.31171	Up	0.000129821	0.000947961	cdna:known chromosome:WBcel235:IV:2126096:2128852:-1 gene:C23H5.9 gene_biotype:protein_coding transcript_biotype:protein_coding	-	-	-	-	gi|17538732|ref|NP_500167.1|/1.26074e-51/Protein GRL-20 [Caenorhabditis elegans]
F28B4.3	6742	5765	13776	75.6929	184.409	1.28468	Up	0	0	cdna:known chromosome:WBcel235:X:3227501:3235408:-1 gene:F28B4.3 gene_biotype:protein_coding transcript_biotype:protein_coding	K14616;K01691;K06051	-	GO:0005488//binding	GO:0040009//regulation of growth rate	gi|17567355|ref|NP_508551.1|/0/Protein F28B4.3 [Caenorhabditis elegans]
ZK1025.3	1129	305	728	23.9139	58.1951	1.28305	Up	1.86315e-42	8.98489e-41	cdna:known chromosome:WBcel235:I:11460780:11463068:-1 gene:ZK1025.3 gene_biotype:protein_coding transcript_biotype:protein_coding	-	-	-	-	gi|17511157|ref|NP_492928.1|/0/Protein ZK1025.3 [Caenorhabditis elegans]
ZK1025.7	1492	57	136	3.38182	8.22657	1.28249	Up	3.96074e-09	5.14137e-08	cdna:known chromosome:WBcel235:I:11465142:11467609:1 gene:ZK1025.7 gene_biotype:protein_coding transcript_biotype:protein_coding	-	-	-	-	gi|17511165|ref|NP_492929.1|/0/Protein BAH-1 [Caenorhabditis elegans]
W06A11.1	573	26	62	4.01664	9.76531	1.28168	Up	7.56316e-05	0.000572626	cdna:known chromosome:WBcel235:II:4067558:4069771:1 gene:W06A11.1 gene_biotype:protein_coding transcript_biotype:protein_coding	-	-	-	-	gi|71996977|ref|NP_494718.2|/1.34421e-74/Protein W06A11.1 [Caenorhabditis elegans]
F49C12.14	751	94	224	11.0798	26.9189	1.28068	Up	4.20758e-14	7.79939e-13	cdna:known chromosome:WBcel235:IV:9322489:9324111:-1 gene:F49C12.14 gene_biotype:protein_coding transcript_biotype:protein_coding	-	-	-	-	gi|17540504|ref|NP_501637.1|/1.16037e-132/Protein F49C12.14 [Caenorhabditis elegans]
T13A10.11	1489	42	100	2.49689	6.06114	1.27946	Up	4.84648e-07	5.05012e-06	cdna:known chromosome:WBcel235:IV:6277435:6279531:-1 gene:T13A10.11 gene_biotype:protein_coding transcript_biotype:protein_coding	K00789	GO:0031224//intrinsic to membrane	GO:0016765//transferase activity, transferring alkyl or aryl (other than methyl) groups;GO:0032550;GO:0043169//cation binding	GO:0006897//endocytosis;GO:0009108//coenzyme biosynthetic process;GO:0009790//embryo development;GO:0010259//multicellular organismal aging;GO:0010876//lipid localization;GO:0035194//posttranscriptional gene silencing by RNA;GO:0035264//multicellular organism growth;GO:0040009//regulation of growth rate;GO:0040011//locomotion;GO:0040025//vulval development;GO:0044238//primary metabolic process;GO…	gi|25145633|ref|NP_741415.1|/0/Protein SAMS-5, isoform a [Caenorhabditis elegans]
C02F4.4	897	69	164	6.80928	16.5006	1.27695	Up	1.15655e-10	1.65272e-09	cdna:known chromosome:WBcel235:IV:10513890:10515283:-1 gene:C02F4.4 gene_biotype:protein_coding transcript_biotype:protein_coding	-	-	-	-	gi|17538414|ref|NP_501941.1|/1.05119e-99/Protein C02F4.4 [Caenorhabditis elegans]
C46H11.9	860	81	192	8.33741	20.1489	1.27303	Up	3.41978e-12	5.51662e-11	cdna:known chromosome:WBcel235:I:5046396:5048018:-1 gene:C46H11.9 gene_biotype:protein_coding transcript_biotype:protein_coding	-	-	-	-	gi|17506061|ref|NP_491509.1|/6.56469e-112/Protein PHAT-2 [Caenorhabditis elegans]
Y40B10A.2	776	44	104	5.01921	12.0954	1.26893	Up	3.39988e-07	3.62541e-06	cdna:known chromosome:WBcel235:V:2057629:2061136:1 gene:Y40B10A.2 gene_biotype:protein_coding transcript_biotype:protein_coding	-	-	GO:0008168//methyltransferase activity	GO:0040009//regulation of growth rate	gi|72001127|ref|NP_503560.2|/7.78308e-127/Protein COMT-3 [Caenorhabditis elegans]
R05G6.9	1300	39	92	2.65562	6.38695	1.26608	Up	1.7037e-06	1.65191e-05	cdna:known chromosome:WBcel235:IV:7514368:7516267:-1 gene:R05G6.9 gene_biotype:protein_coding transcript_biotype:protein_coding	K02599	-	-	-	gi|71992332|ref|NP_501215.2|/0/Protein R05G6.9 [Caenorhabditis elegans]
K10B2.2	1616	112	264	6.13509	14.7439	1.26496	Up	4.48178e-16	9.48073e-15	cdna:known chromosome:WBcel235:II:6368116:6369210:1 gene:K10B2.2 gene_biotype:protein_coding transcript_biotype:protein_coding	K01289;K10;K13289	-	GO:0004180//carboxypeptidase activity	GO:0019538//protein metabolic process	gi|32563989|ref|NP_871927.1|/1.47618e-115/Protein K10B2.2, isoform b [Caenorhabditis elegans]
M03E7.4	1736	31	73	1.58073	3.79509	1.26355	Up	2.12392e-05	0.000177174	cdna:known chromosome:WBcel235:V:5609414:5613219:-1 gene:M03E7.4 gene_biotype:protein_coding transcript_biotype:protein_coding	K06233	-	GO:0097367//carbohydrate derivative binding	GO:0006022	gi|193208398|ref|NP_504481.2|/0/Protein M03E7.4 [Caenorhabditis elegans]
F42G2.4	1080	58	136	4.75388	11.3649	1.2574	Up	6.80054e-09	8.66157e-08	cdna:known chromosome:WBcel235:II:2410773:2412741:-1 gene:F42G2.4 gene_biotype:protein_coding transcript_biotype:protein_coding	-	-	-	-	gi|115532526|ref|NP_001040778.1|/0/Protein FBXA-182 [Caenorhabditis elegans]
Y41G9A.5	1451	482	1126	29.4052	70.0357	1.25202	Up	2.36732e-62	1.562e-60	cdna:known chromosome:WBcel235:X:2946667:2949135:1 gene:Y41G9A.5 gene_biotype:protein_coding transcript_biotype:protein_coding	-	-	-	-	gi|193211198|ref|NP_001123189.1|/5.62693e-164/Protein Y41G9A.5, isoform b [Caenorhabditis elegans]
T13H10.2	1444	27	63	1.65516	3.93751	1.25031	Up	9.08838e-05	0.000679102	cdna:known chromosome:WBcel235:IV:9964267:9966630:1 gene:T13H10.2 gene_biotype:protein_coding transcript_biotype:protein_coding	-	-	-	-	gi|71994061|ref|NP_001023388.1|/0/Protein T13H10.2 [Caenorhabditis elegans]
F10A3.17	1045	306	714	25.9209	61.6639	1.25031	Up	4.3237e-40	1.9609e-38	cdna:known chromosome:WBcel235:V:16158671:16159781:-1 gene:F10A3.17 gene_biotype:protein_coding transcript_biotype:protein_coding	-	-	-	-	gi|193207670|ref|NP_001122906.1|/2.86429e-142/Protein F10A3.17 [Caenorhabditis elegans]
F57H12.3	827	191	444	20.4443	48.4536	1.24491	Up	2.18516e-25	6.70104e-24	cdna:known chromosome:WBcel235:IV:7977836:7979014:1 gene:F57H12.3 gene_biotype:protein_coding transcript_biotype:protein_coding	-	-	-	-	gi|17541690|ref|NP_501334.1|/8.85478e-87/Protein ORA-1 [Caenorhabditis elegans]
W08D2.6	1166	188	436	14.2726	33.7471	1.24151	Up	7.3809e-25	2.21512e-23	cdna:known chromosome:WBcel235:IV:9821895:9823155:1 gene:W08D2.6 gene_biotype:protein_coding transcript_biotype:protein_coding	K06237;K08131;K06236;K10062	-	-	GO:0044699	gi|17542824|ref|NP_501756.1|/4.20395e-100/Protein COL-123 [Caenorhabditis elegans]
F53F1.3	905	111	257	10.8572	25.6291	1.23913	Up	3.0856e-15	6.17695e-14	cdna:known chromosome:WBcel235:V:13408242:13409832:1 gene:F53F1.3 gene_biotype:protein_coding transcript_biotype:protein_coding	K00011	-	GO:0003824//catalytic activity	GO:0002164//larval development;GO:0009790//embryo development;GO:0040009//regulation of growth rate;GO:0044710	gi|17561300|ref|NP_506323.1|/4.27633e-157/Protein F53F1.3 [Caenorhabditis elegans]
Y53F4B.14	431	144	333	29.5753	69.7294	1.23737	Up	2.92702e-19	6.93867e-18	cdna:known chromosome:WBcel235:II:15037989:15039414:1 gene:Y53F4B.14 gene_biotype:protein_coding transcript_biotype:protein_coding	-	-	-	-	gi|392892636|ref|NP_001254461.1|/6.12624e-45/Protein Y53F4B.14, isoform a [Caenorhabditis elegans]
T04G9.2	2010	205	474	9.02822	21.2829	1.23718	Up	9.52392e-27	3.04849e-25	cdna:known chromosome:WBcel235:X:777721:780514:1 gene:T04G9.2 gene_biotype:protein_coding transcript_biotype:protein_coding	K08076	-	GO:0046914//transition metal ion binding;GO:0070011//peptidase activity, acting on L-amino acid peptides	GO:0019538//protein metabolic process	gi|71995692|ref|NP_508154.2|/0/Protein NAS-15 [Caenorhabditis elegans]
C25D7.4	1076	49	113	4.03114	9.47796	1.23339	Up	1.98695e-07	2.1655e-06	cdna:known chromosome:WBcel235:V:15051009:15052526:-1 gene:C25D7.4 gene_biotype:protein_coding transcript_biotype:protein_coding	-	-	-	-	gi|212646245|ref|NP_506704.2|/4.40156e-177/Protein FBXA-82, isoform a [Caenorhabditis elegans]
B0024.1	1048	367	846	30.9991	72.8548	1.2328	Up	3.4383e-46	1.80062e-44	cdna:known chromosome:WBcel235:V:10291696:10292868:-1 gene:B0024.1 gene_biotype:protein_coding transcript_biotype:protein_coding	-	-	-	GO:0032502//developmental process	gi|17557218|ref|NP_505646.1|/1.2204e-108/Protein COL-149 [Caenorhabditis elegans]
F49E11.2	1323	65	149	4.34909	10.1642	1.22472	Up	2.78428e-09	3.66895e-08	cdna:known chromosome:WBcel235:IV:13035955:13038990:-1 gene:F49E11.2 gene_biotype:protein_coding transcript_biotype:protein_coding	-	-	-	-	gi|133931098|ref|NP_502495.3|/0/Protein F49E11.2 [Caenorhabditis elegans]
C12C8.1	2013	38	87	1.67103	3.90054	1.22293	Up	5.95674e-06	5.39769e-05	cdna:known chromosome:WBcel235:I:9320361:9322511:-1 gene:C12C8.1 gene_biotype:protein_coding transcript_biotype:protein_coding	K03283	-	GO:0032550	GO:0006984//ER-nucleus signaling pathway;GO:0010259//multicellular organismal aging;GO:0040009//regulation of growth rate	gi|17507981|ref|NP_492485.1|/0/Protein HSP-70 [Caenorhabditis elegans]
M02B7.2	968	61	139	5.57826	12.9595	1.21612	Up	1.14316e-08	1.42424e-07	cdna:known chromosome:WBcel235:IV:3803589:3804949:1 gene:M02B7.2 gene_biotype:protein_coding transcript_biotype:protein_coding	K01175	GO:0044464//cell part	GO:0004518//nuclease activity;GO:0097159//organic cyclic compound binding	-	gi|17541516|ref|NP_500418.1|/4.47108e-155/Protein M02B7.2 [Caenorhabditis elegans]
ZK899.4	1543	173	393	9.92486	22.9866	1.21168	Up	8.98316e-22	2.33549e-20	cdna:known chromosome:WBcel235:X:9455489:9458326:-1 gene:ZK899.4 gene_biotype:protein_coding transcript_biotype:protein_coding	K07374	GO:0015630//microtubule cytoskeleton;GO:0032991//macromolecular complex	GO:0005198//structural molecule activity;GO:0017111//nucleoside-triphosphatase activity;GO:0032550	GO:0009154//purine ribonucleotide catabolic process;GO:0043623//cellular protein complex assembly;GO:0044763	gi|72003776|ref|NP_509591.2|/0/Protein TBA-8 [Caenorhabditis elegans]
K01D12.9	535	49	111	8.1075	18.7248	1.20762	Up	4.0008e-07	4.22674e-06	cdna:known chromosome:WBcel235:V:12403956:12404644:-1 gene:K01D12.9 gene_biotype:protein_coding transcript_biotype:protein_coding	-	-	-	-	gi|17562060|ref|NP_506108.1|/7.26102e-31/Protein K01D12.9 [Caenorhabditis elegans]
C54G10.4	1625	349	790	19.0115	43.8755	1.20654	Up	7.37362e-42	3.51874e-40	cdna:known chromosome:WBcel235:V:14653683:14658174:-1 gene:C54G10.4 gene_biotype:protein_coding transcript_biotype:protein_coding	K15109	GO:0031224//intrinsic to membrane	-	GO:0044763;GO:0051234//establishment of localization	gi|32566691|ref|NP_872134.1|/0/Protein C54G10.4, isoform b [Caenorhabditis elegans]
C46H11.8	979	57	129	5.15391	11.892	1.20626	Up	4.69932e-08	5.49165e-07	cdna:known chromosome:WBcel235:I:5044201:5045720:-1 gene:C46H11.8 gene_biotype:protein_coding transcript_biotype:protein_coding	-	-	-	-	gi|71982002|ref|NP_491508.2|/6.03456e-115/Protein PHAT-1 [Caenorhabditis elegans]
F38A5.3	813	351	793	38.2174	88.0301	1.20377	Up	7.27614e-42	3.48131e-40	cdna:known chromosome:WBcel235:IV:6588190:6590205:-1 gene:F38A5.3 gene_biotype:protein_coding transcript_biotype:protein_coding	-	GO:0044424//intracellular part	-	-	gi|71988221|ref|NP_001023191.1|/6.0896e-29/Protein LEC-11, isoform a [Caenorhabditis elegans]
C47B2.6	1352	581	1301	38.0403	86.8459	1.19093	Up	1.88273e-66	1.29851e-64	cdna:known chromosome:WBcel235:I:12975185:12978781:1 gene:C47B2.6 gene_biotype:protein_coding transcript_biotype:protein_coding	K01784	-	GO:0016857//racemase and epimerase activity, acting on carbohydrates and derivatives;GO:0033764//steroid dehydrogenase activity, acting on the CH-OH group of donors, NAD or NADP as acceptor;GO:0036094//small molecule binding;GO:0042802//identical protein binding;GO:0048037//cofactor binding	GO:0006012//galactose metabolic process;GO:0007275//multicellular organismal development;GO:0008202//steroid metabolic process;GO:0019318//hexose metabolic process;GO:0033692//cellular polysaccharide biosynthetic process	gi|71982038|ref|NP_001021052.1|/0/Protein GALE-1, isoform b [Caenorhabditis elegans]
C25E10.5	1621	190	424	10.3756	23.6065	1.18598	Up	1.22108e-22	3.30633e-21	cdna:known chromosome:WBcel235:V:9030548:9032598:1 gene:C25E10.5 gene_biotype:protein_coding transcript_biotype:protein_coding	K12307	-	-	-	gi|17558220|ref|NP_505338.1|/0/Protein C25E10.5 [Caenorhabditis elegans]
F56D6.10	289	39	87	11.9457	27.1688	1.18546	Up	9.96976e-06	8.72688e-05	cdna:known chromosome:WBcel235:IV:3895169:3895502:1 gene:F56D6.10 gene_biotype:protein_coding transcript_biotype:protein_coding	-	-	-	-	-
ZK1193.2	3791	468	1044	10.9279	24.854	1.18546	Up	2.6798e-53	1.54996e-51	cdna:known chromosome:WBcel235:X:406452:416535:-1 gene:ZK1193.2 gene_biotype:protein_coding transcript_biotype:protein_coding	K06561;K06560	-	-	-	gi|17570773|ref|NP_508098.1|/0/Protein ZK1193.2 [Caenorhabditis elegans]
B0507.1	1987	76	169	3.38579	7.67605	1.18087	Up	7.65224e-10	1.04295e-08	cdna:known chromosome:WBcel235:V:8776656:8779293:1 gene:B0507.1 gene_biotype:protein_coding transcript_biotype:protein_coding	-	-	-	-	gi|17557384|ref|NP_505262.1|/0/Protein B0507.1 [Caenorhabditis elegans]
R17.2	1948	162	359	7.36157	16.6324	1.17591	Up	3.63568e-19	8.60743e-18	cdna:known chromosome:WBcel235:III:10840012:10844935:-1 gene:R17.2 gene_biotype:protein_coding transcript_biotype:protein_coding	K12603	-	-	-	gi|17554634|ref|NP_499388.1|/0/Protein R17.2 [Caenorhabditis elegans]
F53F1.5	871	764	1690	77.6461	175.113	1.1733	Up	8.3773e-84	7.22226e-82	cdna:known chromosome:WBcel235:V:13415062:13416121:1 gene:F53F1.5 gene_biotype:protein_coding transcript_biotype:protein_coding	-	-	-	-	-
ZK896.5	1512	211	466	12.3531	27.8152	1.17101	Up	2.90758e-24	8.46208e-23	cdna:known chromosome:WBcel235:IV:12876984:12879667:-1 gene:ZK896.5 gene_biotype:protein_coding transcript_biotype:protein_coding	-	-	-	-	gi|17544696|ref|NP_502453.1|/0/Protein ZK896.5 [Caenorhabditis elegans]
C54D10.1	906	246	543	24.0354	54.0904	1.17021	Up	5.58756e-28	1.85343e-26	cdna:known chromosome:WBcel235:V:12414622:12415711:-1 gene:C54D10.1 gene_biotype:protein_coding transcript_biotype:protein_coding	-	GO:0000323//lytic vacuole;GO:0031224//intrinsic to membrane	-	GO:0010038//response to metal ion;GO:0010259//multicellular organismal aging;GO:0010388//cullin deneddylation;GO:0040009//regulation of growth rate	gi|17558902|ref|NP_506114.1|/1.08747e-160/Protein CDR-2 [Caenorhabditis elegans]
ZK1193.4	1074	97	214	7.99488	17.9828	1.16947	Up	6.29362e-12	9.95056e-11	cdna:known chromosome:WBcel235:X:422890:425631:-1 gene:ZK1193.4 gene_biotype:protein_coding transcript_biotype:protein_coding	-	-	-	-	gi|392925165|ref|NP_508101.2|/0/Protein ZK1193.4 [Caenorhabditis elegans]
C18E9.7	2905	54	119	1.64548	3.697	1.16785	Up	3.18968e-07	3.41322e-06	cdna:known chromosome:WBcel235:II:8978580:8982678:-1 gene:C18E9.7 gene_biotype:protein_coding transcript_biotype:protein_coding	K01104;K06252	GO:0044464//cell part	-	GO:0009987//cellular process	gi|17531995|ref|NP_495913.1|/0/Protein C18E9.7 [Caenorhabditis elegans]
F35E12.6	1186	802	1762	59.8596	134.082	1.16346	Up	3.74276e-86	3.35326e-84	cdna:known chromosome:WBcel235:V:13734118:13736247:-1 gene:F35E12.6 gene_biotype:protein_coding transcript_biotype:protein_coding	-	-	-	-	gi|71992682|ref|NP_506401.2|/0/Protein F35E12.6 [Caenorhabditis elegans]
F35C5.7	1159	46	101	3.51333	7.86478	1.16257	Up	2.73666e-06	2.59429e-05	cdna:known chromosome:WBcel235:II:12898290:12900403:1 gene:F35C5.7 gene_biotype:protein_coding transcript_biotype:protein_coding	-	-	-	GO:0007059//chromosome segregation	gi|17533685|ref|NP_496744.1|/0/Protein CLEC-64 [Caenorhabditis elegans]
C45B2.2	401	364	796	80.3529	179.15	1.15675	Up	1.53983e-39	6.91486e-38	cdna:known chromosome:WBcel235:X:6084739:6085188:1 gene:C45B2.2 gene_biotype:protein_coding transcript_biotype:protein_coding	-	-	-	-	gi|17551034|ref|NP_509016.1|/2.92171e-47/Protein C45B2.2 [Caenorhabditis elegans]
F47G4.7	2014	2901	6340	127.507	284.105	1.15585	Up	1.05683e-301	2.79937e-299	cdna:known chromosome:WBcel235:I:14048085:14050993:-1 gene:F47G4.7 gene_biotype:protein_coding transcript_biotype:protein_coding	K01611	-	GO:0016831//carboxy-lyase activity	GO:0006596//polyamine biosynthetic process;GO:0007409//axonogenesis;GO:0044272//sulfur compound biosynthetic process	gi|17508719|ref|NP_493448.1|/0/Protein SMD-1 [Caenorhabditis elegans]
Y50E8A.16	2458	236	512	8.49913	18.7991	1.14528	Up	1.24274e-25	3.84976e-24	cdna:known chromosome:WBcel235:V:14773357:14777331:1 gene:Y50E8A.16 gene_biotype:protein_coding transcript_biotype:protein_coding	K02021;K05656	-	-	-	gi|17565938|ref|NP_506645.1|/0/Protein HAF-7 [Caenorhabditis elegans]
F46C3.6	404	141	305	30.8946	68.1345	1.14103	Up	8.32532e-16	1.73701e-14	cdna:known chromosome:WBcel235:X:11419108:11420060:-1 gene:F46C3.6 gene_biotype:protein_coding transcript_biotype:protein_coding	-	-	-	-	-
Y71G12B.17	1070	63	136	5.21196	11.4711	1.1381	Up	8.5386e-08	9.71731e-07	cdna:known chromosome:WBcel235:I:1667501:1669774:1 gene:Y71G12B.17 gene_biotype:protein_coding transcript_biotype:protein_coding	K01106	GO:0044464//cell part	-	GO:0051234//establishment of localization	gi|71996307|ref|NP_490879.2|/5.99083e-159/Protein Y71G12B.17 [Caenorhabditis elegans]
F08F3.4	1235	476	1026	34.1181	74.9772	1.13592	Up	4.56364e-49	2.51234e-47	cdna:known chromosome:WBcel235:V:5410994:5412981:1 gene:F08F3.4 gene_biotype:protein_coding transcript_biotype:protein_coding	K15789	-	GO:0033764//steroid dehydrogenase activity, acting on the CH-OH group of donors, NAD or NADP as acceptor;GO:0036094//small molecule binding;GO:0048037//cofactor binding	GO:0008202//steroid metabolic process;GO:0033692//cellular polysaccharide biosynthetic process	gi|32566934|ref|NP_504433.2|/0/Protein F08F3.4 [Caenorhabditis elegans]
K08E7.7	2257	80	172	3.13764	6.87774	1.13226	Up	1.95706e-09	2.59573e-08	cdna:known chromosome:WBcel235:IV:12586486:12590428:-1 gene:K08E7.7 gene_biotype:protein_coding transcript_biotype:protein_coding	K03347	GO:0000151//ubiquitin ligase complex	GO:0044389	GO:0000087//M phase of mitotic cell cycle;GO:0002164//larval development;GO:0006897//endocytosis;GO:0006915//apoptotic process;GO:0008283//cell proliferation;GO:0009790//embryo development;GO:0010259//multicellular organismal aging;GO:0032535//regulation of cellular component size;GO:0033554//cellular response to stress;GO:0035264//multicellular organism growth;GO:0040009//regulation of growth ra…	gi|17539492|ref|NP_502412.1|/0/Protein CUL-6 [Caenorhabditis elegans]
F40E10.5	1091	185	397	15.0104	32.8409	1.12953	Up	8.11444e-20	1.95399e-18	cdna:known chromosome:WBcel235:X:14701791:14703684:1 gene:F40E10.5 gene_biotype:protein_coding transcript_biotype:protein_coding	-	-	-	-	gi|17567593|ref|NP_510441.1|/3.77687e-132/Protein F40E10.5 [Caenorhabditis elegans]
F09E8.6	1552	52	111	2.9659	6.45476	1.12189	Up	1.75645e-06	1.69945e-05	cdna:known chromosome:WBcel235:IV:13170544:13173694:1 gene:F09E8.6 gene_biotype:protein_coding transcript_biotype:protein_coding	K08076	-	GO:0004175//endopeptidase activity;GO:0046914//transition metal ion binding	GO:0019538//protein metabolic process	gi|71986189|ref|NP_502533.2|/0/Protein NAS-14 [Caenorhabditis elegans]
C32H11.12	1135	38	81	2.96369	6.44077	1.11984	Up	4.66832e-05	0.000369523	cdna:known chromosome:WBcel235:IV:12940142:12941368:-1 gene:C32H11.12 gene_biotype:protein_coding transcript_biotype:protein_coding	-	-	-	-	gi|17538936|ref|NP_502474.1|/0/Protein DOD-24 [Caenorhabditis elegans]
B0403.4	1640	3670	7802	198.092	429.349	1.11598	Up	0	0	cdna:known chromosome:WBcel235:X:7066345:7068563:-1 gene:B0403.4 gene_biotype:protein_coding transcript_biotype:protein_coding	K09584	-	GO:0015036//disulfide oxidoreductase activity	GO:0002164//larval development;GO:0018904;GO:0019725//cellular homeostasis	gi|17549970|ref|NP_509190.1|/0/Protein TAG-320 [Caenorhabditis elegans]
D1053.1	970	383	811	34.952	75.4567	1.11028	Up	8.59684e-38	3.70577e-36	cdna:known chromosome:WBcel235:X:11726270:11727897:-1 gene:D1053.1 gene_biotype:protein_coding transcript_biotype:protein_coding	K01800	GO:0044424//intracellular part	GO:0005515//protein binding;GO:0015036//disulfide oxidoreductase activity	GO:0006520//cellular amino acid metabolic process	gi|17551302|ref|NP_509962.1|/3.70023e-117/Protein GST-42 [Caenorhabditis elegans]
F08A8.3	2091	35	74	1.48169	3.19394	1.10809	Up	0.000114773	0.000844829	cdna:known chromosome:WBcel235:I:12946947:12951099:1 gene:F08A8.3 gene_biotype:protein_coding transcript_biotype:protein_coding	K00232	GO:0042579//microbody	GO:0000166//nucleotide binding;GO:0016634	GO:0009062//fatty acid catabolic process;GO:0010876//lipid localization;GO:0040009//regulation of growth rate	gi|17506533|ref|NP_493263.1|/0/Protein F08A8.3 [Caenorhabditis elegans]
C12C8.2	1562	143	302	8.104	17.4492	1.10645	Up	5.5704e-15	1.09473e-13	cdna:known chromosome:WBcel235:I:9327857:9330930:1 gene:C12C8.2 gene_biotype:protein_coding transcript_biotype:protein_coding	K01758	-	GO:0043168	GO:0008152//metabolic process	gi|71980708|ref|NP_492486.2|/0/Protein CBL-1, isoform a [Caenorhabditis elegans]
F48G7.8	498	36	76	6.39908	13.7731	1.10592	Up	9.4943e-05	0.000707986	cdna:known chromosome:WBcel235:V:627106:627650:-1 gene:F48G7.8 gene_biotype:protein_coding transcript_biotype:protein_coding	K08076	-	-	-	gi|17561176|ref|NP_503270.1|/5.50295e-93/Protein F48G7.8 [Caenorhabditis elegans]
Y102A5B.3	1103	45	95	3.61145	7.77315	1.10592	Up	1.25216e-05	0.000108104	cdna:known chromosome:WBcel235:V:16850394:16852079:-1 gene:Y102A5B.3 gene_biotype:protein_coding transcript_biotype:protein_coding	K06560;K06559	-	-	GO:0009653//anatomical structure morphogenesis	gi|72000946|ref|NP_507255.2|/0/Protein CLEC-37 [Caenorhabditis elegans]
ZK265.9	1122	252	531	19.8816	42.7121	1.10321	Up	4.56924e-25	1.38724e-23	cdna:known chromosome:WBcel235:I:8253374:8254926:-1 gene:ZK265.9 gene_biotype:protein_coding transcript_biotype:protein_coding	-	-	-	-	gi|71997328|ref|NP_001021865.1|/5.67959e-155/Protein ZK265.9 [Caenorhabditis elegans]
F53B6.9	441	56	118	11.2407	24.1486	1.10321	Up	1.15822e-06	1.14861e-05	cdna:known chromosome:WBcel235:I:8945473:8946200:-1 gene:F53B6.9 gene_biotype:protein_coding transcript_biotype:protein_coding	-	-	-	-	-
T05E12.6	2086	2300	4834	97.6018	209.142	1.0995	Up	7.35524e-213	1.40033e-210	cdna:known chromosome:WBcel235:V:17084999:17090023:-1 gene:T05E12.6 gene_biotype:protein_coding transcript_biotype:protein_coding	-	-	-	-	gi|32566971|ref|NP_507327.2|/0/Protein T05E12.6, isoform a [Caenorhabditis elegans]
T22H6.2	2573	1442	3029	49.6101	106.245	1.09869	Up	5.68082e-134	7.52379e-132	cdna:known chromosome:WBcel235:X:12782396:12787154:1 gene:T22H6.2 gene_biotype:protein_coding transcript_biotype:protein_coding	K12657	GO:0043231//intracellular membrane-bounded organelle	GO:0016620//oxidoreductase activity, acting on the aldehyde or oxo group of donors, NAD or NADP as acceptor;GO:0016774//phosphotransferase activity, carboxyl group as acceptor	GO:0006560//proline metabolic process;GO:0006897//endocytosis;GO:0040009//regulation of growth rate	gi|453232878|ref|NP_510133.2|/0/Protein ALH-13, isoform a [Caenorhabditis elegans]
C15H9.6	2666	9794	20567	325.195	696.241	1.09828	Up	0	0	cdna:known chromosome:WBcel235:X:6089028:6091801:-1 gene:C15H9.6 gene_biotype:protein_coding transcript_biotype:protein_coding	K09490	-	-	-	-
F15H10.8	1135	45	94	3.50963	7.47448	1.09065	Up	1.73547e-05	0.00014712	cdna:known chromosome:WBcel235:V:10401457:10402827:-1 gene:F15H10.8 gene_biotype:protein_coding transcript_biotype:protein_coding	-	-	-	-	gi|17559748|ref|NP_505673.1|/0/Protein F15H10.8 [Caenorhabditis elegans]
T05E11.3	2606	9137	19074	310.366	660.566	1.08973	Up	0	0	cdna:known chromosome:WBcel235:IV:11119344:11123154:1 gene:T05E11.3 gene_biotype:protein_coding transcript_biotype:protein_coding	K09487	-	GO:0005515//protein binding;GO:0032550	GO:0044267//cellular protein metabolic process;GO:0050896//response to stimulus	gi|392900718|ref|NP_001255536.1|/0/Protein ENPL-1, isoform a [Caenorhabditis elegans]
F53C11.1	1575	58	121	3.25981	6.93352	1.0888	Up	1.1029e-06	1.09672e-05	cdna:known chromosome:WBcel235:V:13775751:13777771:1 gene:F53C11.1 gene_biotype:protein_coding transcript_biotype:protein_coding	-	-	-	-	gi|32567019|ref|NP_506411.2|/0/Protein F53C11.1 [Caenorhabditis elegans]
C35A11.2	1176	61	127	4.59163	9.74642	1.08587	Up	6.3095e-07	6.47131e-06	cdna:known chromosome:WBcel235:V:5386110:5389448:1 gene:C35A11.2 gene_biotype:protein_coding transcript_biotype:protein_coding	-	-	-	-	gi|71985700|ref|NP_504429.2|/6.53322e-117/Protein C35A11.2 [Caenorhabditis elegans]
F13D12.6	2081	1834	3817	78.0138	165.538	1.08536	Up	4.79442e-165	7.82389e-163	cdna:known chromosome:WBcel235:II:11739484:11743398:1 gene:F13D12.6 gene_biotype:protein_coding transcript_biotype:protein_coding	K13289	GO:0031224//intrinsic to membrane	GO:0004180//carboxypeptidase activity	GO:0010876//lipid localization;GO:0019538//protein metabolic process	gi|17533155|ref|NP_496507.1|/0/Protein F13D12.6 [Caenorhabditis elegans]
F22D6.3	1820	1140	2371	55.447	117.573	1.08438	Up	4.1016e-103	4.23531e-101	cdna:known chromosome:WBcel235:I:7088022:7090062:-1 gene:F22D6.3 gene_biotype:protein_coding transcript_biotype:protein_coding	K01893	GO:0044424//intracellular part	GO:0004812//aminoacyl-tRNA ligase activity;GO:0032550	GO:0002164//larval development;GO:0006418//tRNA aminoacylation for protein translation;GO:0009790//embryo development;GO:0012501//programmed cell death	gi|71984122|ref|NP_001021405.1|/0/Protein NARS-1, isoform a [Caenorhabditis elegans]
E04A4.4	2704	894	1857	29.2668	61.9803	1.08255	Up	5.97672e-81	5.01085e-79	cdna:known chromosome:WBcel235:IV:4739262:4744267:-1 gene:E04A4.4 gene_biotype:protein_coding transcript_biotype:protein_coding	K00784	-	GO:0003824//catalytic activity	GO:0003006//developmental process involved in reproduction;GO:0006897//endocytosis;GO:0009790//embryo development;GO:0022403;GO:0035264//multicellular organism growth;GO:0040009//regulation of growth rate;GO:0040025//vulval development	gi|71985808|ref|NP_001023109.1|/0/Protein HOE-1, isoform a [Caenorhabditis elegans]
T10E10.6	1013	39	81	3.408	7.21646	1.08237	Up	7.45986e-05	0.000565508	cdna:known chromosome:WBcel235:X:6331620:6332686:1 gene:T10E10.6 gene_biotype:protein_coding transcript_biotype:protein_coding	-	GO:0031224//intrinsic to membrane	GO:0005198//structural molecule activity	GO:0009653//anatomical structure morphogenesis;GO:0040009//regulation of growth rate	gi|32566594|ref|NP_872267.1|/2.37707e-69/Protein COL-170 [Caenorhabditis elegans]
F20D6.4	1328	1787	3706	119.116	251.858	1.08024	Up	4.31724e-159	6.80226e-157	cdna:known chromosome:WBcel235:V:8181426:8183442:1 gene:F20D6.4 gene_biotype:protein_coding transcript_biotype:protein_coding	K13963	-	-	-	gi|71990598|ref|NP_001023824.1|/0/Protein SRP-7, isoform c [Caenorhabditis elegans]
K08D8.6	1718	217	450	11.181	23.6395	1.08015	Up	8.19138e-21	2.04807e-19	cdna:known chromosome:WBcel235:IV:12887060:12890510:-1 gene:K08D8.6 gene_biotype:protein_coding transcript_biotype:protein_coding	-	-	-	-	gi|71991336|ref|NP_502457.2|/0/Protein K08D8.6 [Caenorhabditis elegans]
C34F6.1	3459	237	489	6.06516	12.7587	1.07287	Up	2.97722e-22	7.89763e-21	cdna:known chromosome:WBcel235:X:11192512:11196841:-1 gene:C34F6.1 gene_biotype:protein_coding transcript_biotype:protein_coding	K03909	-	GO:0004866//endopeptidase inhibitor activity	GO:0007059//chromosome segregation	gi|17550808|ref|NP_509868.1|/0/Protein C34F6.1 [Caenorhabditis elegans]
C47B2.5	996	897	1847	79.7219	167.362	1.06992	Up	4.90476e-79	3.96656e-77	cdna:known chromosome:WBcel235:I:12968946:12970238:1 gene:C47B2.5 gene_biotype:protein_coding transcript_biotype:protein_coding	K03264	GO:0005882//intermediate filament;GO:0031981//nuclear lumen	GO:0008135//translation factor activity, nucleic acid binding;GO:0043021//ribonucleoprotein complex binding	GO:0002164//larval development;GO:0006413//translational initiation;GO:0006897//endocytosis;GO:0009790//embryo development;GO:0040009//regulation of growth rate;GO:0042255//ribosome assembly	gi|17506075|ref|NP_493272.1|/7.31949e-132/Protein EIF-6 [Caenorhabditis elegans]
F41F3.8	578	51	105	7.81064	16.395	1.06974	Up	7.75174e-06	6.9179e-05	cdna:known chromosome:WBcel235:V:4648832:4650620:1 gene:F41F3.8 gene_biotype:protein_coding transcript_biotype:protein_coding	-	-	-	-	-
T28C6.1	1070	759	1560	62.7917	131.58	1.06729	Up	8.87252e-67	6.18943e-65	cdna:known chromosome:WBcel235:IV:8816348:8818004:1 gene:T28C6.1 gene_biotype:protein_coding transcript_biotype:protein_coding	-	-	-	-	gi|7508658|pir||T25405/1.9417e-16/hypothetical protein T28C6.2 - Caenorhabditis elegans
DY3.5	1995	74	152	3.28347	6.87622	1.06639	Up	7.752e-08	8.88297e-07	cdna:known chromosome:WBcel235:I:8771434:8777511:-1 gene:DY3.5 gene_biotype:protein_coding transcript_biotype:protein_coding	-	-	-	-	gi|392886510|ref|NP_492375.3|/7.83517e-93/Protein PQN-26 [Caenorhabditis elegans]
Y40D12A.2	1637	546	1117	29.5249	61.5819	1.06058	Up	7.65714e-48	4.10409e-46	cdna:known chromosome:WBcel235:III:6612523:6615134:1 gene:Y40D12A.2 gene_biotype:protein_coding transcript_biotype:protein_coding	K01289;K10;K13289	-	GO:0004180//carboxypeptidase activity	GO:0019538//protein metabolic process	gi|17555824|ref|NP_498460.1|/0/Protein Y40D12A.2 [Caenorhabditis elegans]
Y38A10A.5	1411	17484	35719	1096.88	2284.66	1.05858	Up	0	0	cdna:known chromosome:WBcel235:V:6098993:6100553:-1 gene:Y38A10A.5 gene_biotype:protein_coding transcript_biotype:protein_coding	K08057	GO:0044432//endoplasmic reticulum part	GO:0005515//protein binding;GO:0046872//metal ion binding	GO:0002164//larval development;GO:0007044//cell-substrate junction assembly;GO:0007588//excretion;GO:0008219//cell death;GO:0022414//reproductive process;GO:0044267//cellular protein metabolic process;GO:0050896//response to stimulus	gi|17565428|ref|NP_504575.1|/0/Protein CRT-1 [Caenorhabditis elegans]
K11G9.5	1682	201	410	10.5783	21.9992	1.05635	Up	1.78626e-18	4.11695e-17	cdna:known chromosome:WBcel235:V:6685808:6688547:-1 gene:K11G9.5 gene_biotype:protein_coding transcript_biotype:protein_coding	K08193;K12301	GO:0031224//intrinsic to membrane	-	GO:0044763	gi|25145964|ref|NP_504695.2|/0/Protein K11G9.5 [Caenorhabditis elegans]
Y105C5B.15	1316	86	175	5.78478	12.0014	1.05287	Up	1.14928e-08	1.43089e-07	cdna:known chromosome:WBcel235:IV:15951909:15954841:1 gene:Y105C5B.15 gene_biotype:protein_coding transcript_biotype:protein_coding	K01113	-	GO:0016791//phosphatase activity;GO:0043169//cation binding	-	gi|17544356|ref|NP_502904.1|/0/Protein Y105C5B.15 [Caenorhabditis elegans]
C47B2.4	1009	963	1959	84.485	175.223	1.05243	Up	1.53323e-81	1.29137e-79	cdna:known chromosome:WBcel235:I:12967216:12968282:-1 gene:C47B2.4 gene_biotype:protein_coding transcript_biotype:protein_coding	K02739	GO:0000502//proteasome complex;GO:0043231//intracellular membrane-bounded organelle	GO:0004175//endopeptidase activity;GO:0005488//binding	GO:0002164//larval development;GO:0006508//proteolysis;GO:0009790//embryo development;GO:0010259//multicellular organismal aging;GO:0012501//programmed cell death	gi|17508495|ref|NP_493271.1|/3.0113e-157/Protein PBS-2 [Caenorhabditis elegans]
C52D10.3	856	63	128	6.51495	13.4954	1.05064	Up	1.12401e-06	1.11711e-05	cdna:known chromosome:WBcel235:IV:17176475:17182664:1 gene:C52D10.3 gene_biotype:protein_coding transcript_biotype:protein_coding	-	-	-	-	gi|115534511|ref|NP_503047.3|/2.79621e-155/Protein C52D10.3 [Caenorhabditis elegans]
K06H7.3	2042	563	1143	24.406	50.5172	1.04954	Up	4.0839e-48	2.20833e-46	cdna:known chromosome:WBcel235:III:8088482:8091600:1 gene:K06H7.3 gene_biotype:protein_coding transcript_biotype:protein_coding	-	GO:0043005//neuron projection;GO:0044424//intracellular part	-	-	gi|17554084|ref|NP_498765.1|/0/Protein VMS-1 [Caenorhabditis elegans]
R12A1.3	1184	74	150	5.53254	11.4337	1.04728	Up	1.44915e-07	1.61108e-06	cdna:known chromosome:WBcel235:V:1422796:1425717:-1 gene:R12A1.3 gene_biotype:protein_coding transcript_biotype:protein_coding	K03909;K04520	-	GO:0004866//endopeptidase inhibitor activity	GO:0051346//negative regulation of hydrolase activity	gi|193208506|ref|NP_503410.3|/8.53429e-157/Protein R12A1.3 [Caenorhabditis elegans]
B0285.9	1315	84	170	5.65455	11.6673	1.04499	Up	2.2686e-08	2.74046e-07	cdna:known chromosome:WBcel235:III:4367832:4370160:1 gene:B0285.9 gene_biotype:protein_coding transcript_biotype:protein_coding	K14156	-	GO:0016301//kinase activity	GO:0006656//phosphatidylcholine biosynthetic process;GO:0010876//lipid localization	gi|32565112|ref|NP_497880.2|/0/Protein CKB-2 [Caenorhabditis elegans]
F11G11.3	777	157	317	17.8864	36.8203	1.04164	Up	2.5098e-14	4.72416e-13	cdna:known chromosome:WBcel235:II:4879885:4881110:1 gene:F11G11.3 gene_biotype:protein_coding transcript_biotype:protein_coding	K00799;K01830	-	-	GO:0040009//regulation of growth rate	gi|32564637|ref|NP_494882.2|/5.23272e-115/Protein GST-6 [Caenorhabditis elegans]
D2007.1	351	56	113	14.1229	29.0549	1.04074	Up	5.69666e-06	5.18515e-05	cdna:known chromosome:WBcel235:III:8155458:8155942:1 gene:D2007.1 gene_biotype:protein_coding transcript_biotype:protein_coding	-	-	-	-	gi|17552804|ref|NP_498781.1|/1.97724e-43/Protein D2007.1 [Caenorhabditis elegans]
C29E4.1	1130	1339	2700	104.893	215.642	1.03972	Up	1.66541e-109	1.87893e-107	cdna:known chromosome:WBcel235:III:7948838:7950067:1 gene:C29E4.1 gene_biotype:protein_coding transcript_biotype:protein_coding	K06236	GO:0031224//intrinsic to membrane	GO:0005198//structural molecule activity	GO:0009653//anatomical structure morphogenesis	gi|17552372|ref|NP_498729.1|/6.33251e-154/Protein COL-90 [Caenorhabditis elegans]
C32H11.5	725	62	125	7.57004	15.5604	1.03951	Up	1.85075e-06	1.78785e-05	cdna:known chromosome:WBcel235:IV:12923525:12924378:-1 gene:C32H11.5 gene_biotype:protein_coding transcript_biotype:protein_coding	-	-	GO:0005488//binding	-	gi|17538922|ref|NP_502467.1|/1.02672e-90/Protein C32H11.5 [Caenorhabditis elegans]
F47H4.10	604	93	187	13.6298	27.9417	1.03565	Up	5.8428e-09	7.47821e-08	cdna:known chromosome:WBcel235:V:17347906:17348712:1 gene:F47H4.10 gene_biotype:protein_coding transcript_biotype:protein_coding	K03094	GO:0031461//cullin-RING ubiquitin ligase complex;GO:0031981//nuclear lumen;GO:0044444//cytoplasmic part	GO:0005488//binding;GO:0019787//small conjugating protein ligase activity	GO:0002164//larval development;GO:0006897//endocytosis;GO:0007166//cell surface receptor signaling pathway;GO:0009790//embryo development;GO:0010259//multicellular organismal aging;GO:0010390//histone monoubiquitination;GO:0035194//posttranscriptional gene silencing by RNA;GO:0040009//regulation of growth rate;GO:0043161//proteasomal ubiquitin-dependent protein catabolic process;GO:0044764;GO:004…	gi|17563270|ref|NP_507393.1|/2.52466e-77/Protein SKR-5 [Caenorhabditis elegans]
T14G8.3	3320	872	1745	23.25	47.4358	1.02875	Up	3.11472e-70	2.26804e-68	cdna:known chromosome:WBcel235:X:12861237:12870026:1 gene:T14G8.3 gene_biotype:protein_coding transcript_biotype:protein_coding	K09486	-	GO:0032550	-	gi|71996597|ref|NP_001024914.1|/0/Protein T14G8.3, isoform b [Caenorhabditis elegans]
C28H8.5	909	44	88	4.28483	8.73711	1.02792	Up	7.50048e-05	0.000568351	cdna:known chromosome:WBcel235:III:5884330:5885775:1 gene:C28H8.5 gene_biotype:protein_coding transcript_biotype:protein_coding	-	-	-	-	gi|115532666|ref|NP_001040848.1|/5.38319e-157/Protein C28H8.5, isoform a [Caenorhabditis elegans]
T06A4.1	1963	82	163	3.69775	7.49404	1.01909	Up	8.24486e-08	9.41821e-07	cdna:known chromosome:WBcel235:I:770892:776368:1 gene:T06A4.1 gene_biotype:protein_coding transcript_biotype:protein_coding	K01298	-	-	-	-
F52E1.14	694	1280	2543	163.266	330.701	1.01831	Up	7.72086e-100	7.75353e-98	cdna:known chromosome:WBcel235:V:8383922:8384867:1 gene:F52E1.14 gene_biotype:protein_coding transcript_biotype:protein_coding	-	-	-	-	gi|115533194|ref|NP_001041119.1|/7.9611e-106/Protein F52E1.14 [Caenorhabditis elegans]
T13C5.8	846	54	107	5.65025	11.4146	1.0145	Up	1.54096e-05	0.000131608	cdna:known chromosome:WBcel235:X:6205206:6206405:-1 gene:T13C5.8 gene_biotype:protein_coding transcript_biotype:protein_coding	-	-	GO:0046914//transition metal ion binding	GO:0044763	gi|193210959|ref|NP_001123181.1|/5.91649e-73/Protein MTP-18 [Caenorhabditis elegans]
Y32F6A.5	1764	1400	2774	70.2545	141.924	1.01446	Up	4.54098e-108	4.99973e-106	cdna:known chromosome:WBcel235:V:10446534:10453972:-1 gene:Y32F6A.5 gene_biotype:protein_coding transcript_biotype:protein_coding	K09646	-	GO:0004180//carboxypeptidase activity	GO:0019538//protein metabolic process	gi|392920353|ref|NP_001256221.1|/0/Protein Y32F6A.5, isoform b [Caenorhabditis elegans]
Y43F8A.3	1332	43	85	2.85765	5.75922	1.01104	Up	0.000123772	0.000908503	cdna:known chromosome:WBcel235:V:19377444:19381031:1 gene:Y43F8A.3 gene_biotype:protein_coding transcript_biotype:protein_coding	K14351	GO:0031224//intrinsic to membrane	GO:0052689	GO:0009790//embryo development;GO:0012501//programmed cell death;GO:0033057	gi|392922938|ref|NP_001256853.1|/0/Protein Y43F8A.3, isoform b [Caenorhabditis elegans]
D1054.8	934	170	336	16.1119	32.4669	1.01085	Up	1.92354e-14	3.65072e-13	cdna:known chromosome:WBcel235:V:10784273:10785369:1 gene:D1054.8 gene_biotype:protein_coding transcript_biotype:protein_coding	K11147	-	GO:0016491//oxidoreductase activity;GO:0036094//small molecule binding	GO:0006725//cellular aromatic compound metabolic process;GO:0044281//small molecule metabolic process;GO:0046483//heterocycle metabolic process;GO:0051186//cofactor metabolic process;GO:1901360;GO:1901564;GO:1901576	gi|17559104|ref|NP_505755.1|/1.07551e-150/Protein D1054.8 [Caenorhabditis elegans]
F47E1.2	2407	124	245	4.56026	9.18626	1.01036	Up	6.49174e-11	9.45415e-10	cdna:known chromosome:WBcel235:X:9057650:9061861:1 gene:F47E1.2 gene_biotype:protein_coding transcript_biotype:protein_coding	K14353	GO:0031224//intrinsic to membrane	-	GO:0009790//embryo development;GO:0044763;GO:0051234//establishment of localization	gi|17567851|ref|NP_509531.1|/0/Protein F47E1.2 [Caenorhabditis elegans]
C26C6.3	2165	74	146	3.02565	6.08617	1.00829	Up	4.93936e-07	5.14397e-06	cdna:known chromosome:WBcel235:I:7527307:7531699:1 gene:C26C6.3 gene_biotype:protein_coding transcript_biotype:protein_coding	K08076	-	GO:0004175//endopeptidase activity;GO:0046914//transition metal ion binding	GO:0019538//protein metabolic process	gi|71980967|ref|NP_492109.2|/0/Protein NAS-36 [Caenorhabditis elegans]
DC2.3	1156	596	1175	45.6387	91.7337	1.0072	Up	2.71544e-46	1.42615e-44	cdna:known chromosome:WBcel235:V:204384:209757:1 gene:DC2.3 gene_biotype:protein_coding transcript_biotype:protein_coding	K10093;K06832	GO:0031224//intrinsic to membrane;GO:0043231//intracellular membrane-bounded organelle	GO:0005488//binding	GO:0016482//cytoplasmic transport	gi|193207619|ref|NP_001023759.2|/0/Protein LEC-12, isoform b [Caenorhabditis elegans]
Y43F8C.2	310	202	398	57.6812	115.87	1.00633	Up	1.01697e-16	2.19966e-15	cdna:known chromosome:WBcel235:V:19613528:19614521:1 gene:Y43F8C.2 gene_biotype:protein_coding transcript_biotype:protein_coding	-	-	-	-	-
F13D12.3	979	396	778	35.8061	71.7209	1.00219	Up	5.56996e-31	2.06077e-29	cdna:known chromosome:WBcel235:II:11720507:11722315:1 gene:F13D12.3 gene_biotype:protein_coding transcript_biotype:protein_coding	-	-	-	-	gi|17533149|ref|NP_496502.1|/3.06519e-34/Protein F13D12.3 [Caenorhabditis elegans]
Y48E1B.10	742	188	369	22.4284	44.8819	1.00081	Up	1.75281e-15	3.57146e-14	cdna:known chromosome:WBcel235:II:13608185:13609780:-1 gene:Y48E1B.10 gene_biotype:protein_coding transcript_biotype:protein_coding	K00799;K01830	-	-	-	gi|17537261|ref|NP_496858.1|/2.47994e-111/Protein GST-20 [Caenorhabditis elegans]
W05G11.3	958	45	0	4.15807	0.01	-8.69977	Down	4.42604e-14	8.19602e-13	cdna:known chromosome:WBcel235:III:41061:42018:1 gene:W05G11.3 gene_biotype:protein_coding transcript_biotype:protein_coding	K14972;K08867	GO:0031224//intrinsic to membrane	-	-	gi|17555486|ref|NP_497131.1|/3.12247e-52/Protein COL-88 [Caenorhabditis elegans]
T26H2.5	707	20	0	2.50412	0.01	-7.96816	Down	1.1674e-06	1.15645e-05	cdna:known chromosome:WBcel235:V:19230765:19232020:1 gene:T26H2.5 gene_biotype:protein_coding transcript_biotype:protein_coding	K14381	-	GO:0005488//binding	GO:0000003//reproduction;GO:0009653//anatomical structure morphogenesis;GO:0009790//embryo development;GO:0009987//cellular process	gi|17564744|ref|NP_507738.1|/2.90767e-103/Protein T26H2.5 [Caenorhabditis elegans]
F38A3.1	1039	261	2	22.2367	0.173725	-6.99999	Down	2.88544e-74	2.19738e-72	cdna:known chromosome:WBcel235:II:11012395:11013779:-1 gene:F38A3.1 gene_biotype:protein_coding transcript_biotype:protein_coding	K10624;K14437;K14572;K08867	-	-	-	gi|17533807|ref|NP_496361.1|/1.65668e-57/Protein COL-81 [Caenorhabditis elegans]
T05E12.3	865	51	1	5.21913	0.104336	-5.64451	Down	1.95986e-14	3.71581e-13	cdna:known chromosome:WBcel235:V:17076865:17077978:-1 gene:T05E12.3 gene_biotype:protein_coding transcript_biotype:protein_coding	K15074	-	-	-	gi|17563898|ref|NP_507324.1|/5.38057e-130/Protein T05E12.3 [Caenorhabditis elegans]
C42D8.2	4948	25	0	0.447255	0.01	-5.48302	Down	3.82806e-08	4.52265e-07	cdna:known chromosome:WBcel235:X:5101032:5106173:1 gene:C42D8.2 gene_biotype:protein_coding transcript_biotype:protein_coding	K14462;K13211	GO:0031988//membrane-bounded vesicle;GO:0044444//cytoplasmic part	GO:0022892	GO:0003006//developmental process involved in reproduction;GO:0009790//embryo development;GO:0010259//multicellular organismal aging;GO:0010876//lipid localization;GO:0033057;GO:0040009//regulation of growth rate	gi|193209657|ref|NP_001123117.1|/0/Protein VIT-2, isoform b [Caenorhabditis elegans]
C45G7.3	476	2262	104	420.659	19.7186	-4.41502	Down	0	0	cdna:known chromosome:WBcel235:IV:2464471:2465440:1 gene:C45G7.3 gene_biotype:protein_coding transcript_biotype:protein_coding	-	-	GO:0004553//hydrolase activity, hydrolyzing O-glycosyl compounds	GO:0009790//embryo development	gi|17539208|ref|NP_500206.1|/1.92741e-83/Protein ILYS-3 [Caenorhabditis elegans]
F41F3.4	1014	343	19	29.9434	1.69108	-4.14622	Down	5.69464e-77	4.52526e-75	cdna:known chromosome:WBcel235:V:4652382:4653986:-1 gene:F41F3.4 gene_biotype:protein_coding transcript_biotype:protein_coding	-	GO:0031224//intrinsic to membrane	GO:0005198//structural molecule activity	GO:0002164//larval development;GO:0009790//embryo development;GO:0010259//multicellular organismal aging;GO:0040009//regulation of growth rate;GO:0048729//tissue morphogenesis	gi|17560884|ref|NP_504252.1|/4.22522e-42/Protein COL-139 [Caenorhabditis elegans]
M18.1	1128	385	23	30.2132	1.84021	-4.03723	Down	1.28037e-84	1.11968e-82	cdna:known chromosome:WBcel235:IV:12108671:12110258:-1 gene:M18.1 gene_biotype:protein_coding transcript_biotype:protein_coding	-	-	GO:0005488//binding	-	gi|17541560|ref|NP_502297.1|/2.82562e-45/Protein COL-129 [Caenorhabditis elegans]
B0218.8	989	1788	114	160.035	10.403	-3.94332	Down	0	0	cdna:known chromosome:WBcel235:IV:8167163:8168774:-1 gene:B0218.8 gene_biotype:protein_coding transcript_biotype:protein_coding	K06560	-	GO:0005488//binding	-	gi|17538262|ref|NP_501371.1|/0/Protein CLEC-52 [Caenorhabditis elegans]
ZK1193.1	1017	66	5	5.7447	0.443709	-3.69455	Down	1.16163e-14	2.23722e-13	cdna:known chromosome:WBcel235:X:421707:422776:1 gene:ZK1193.1 gene_biotype:protein_coding transcript_biotype:protein_coding	-	GO:0031224//intrinsic to membrane;GO:0060103	GO:0005198//structural molecule activity	GO:0042335//cuticle development	gi|687636|gb|AAA62505.1|/7.86321e-121/collagen [Caenorhabditis elegans]
C36A4.1	1625	312	24	16.996	1.33293	-3.67252	Down	4.00646e-64	2.70207e-62	cdna:known chromosome:WBcel235:III:3832600:3834589:1 gene:C36A4.1 gene_biotype:protein_coding transcript_biotype:protein_coding	K07424	GO:0031224//intrinsic to membrane	GO:0016491//oxidoreductase activity;GO:0046906//tetrapyrrole binding;GO:0046914//transition metal ion binding	GO:0044710	gi|392894536|ref|NP_497775.3|/0/Protein CYP-25A1 [Caenorhabditis elegans]
F56D6.15	1188	198	16	14.7534	1.21549	-3.60144	Down	1.35173e-40	6.22307e-39	cdna:known chromosome:WBcel235:IV:3929650:3931574:1 gene:F56D6.15 gene_biotype:protein_coding transcript_biotype:protein_coding	-	-	-	-	gi|86570121|ref|NP_001033417.1|/0/Protein CLEC-69 [Caenorhabditis elegans]
F26F12.1	941	91	9	8.56044	0.863181	-3.30995	Down	4.05538e-18	9.25346e-17	cdna:known chromosome:WBcel235:V:5835857:5836841:-1 gene:F26F12.1 gene_biotype:protein_coding transcript_biotype:protein_coding	-	GO:0031224//intrinsic to membrane;GO:0060103	-	-	gi|193207877|ref|NP_001122932.1|/2.98495e-60/Protein COL-140, isoform b [Caenorhabditis elegans]
F36D3.9	1022	4737	511	410.296	45.1252	-3.18466	Down	0	0	cdna:known chromosome:WBcel235:V:16532989:16534110:-1 gene:F36D3.9 gene_biotype:protein_coding transcript_biotype:protein_coding	K01363	-	GO:0070011//peptidase activity, acting on L-amino acid peptides	GO:0010259//multicellular organismal aging	gi|392922404|ref|NP_507186.3|/0/Protein CPR-2 [Caenorhabditis elegans]
Y46C8AL.3	1401	1424	163	89.9738	10.5002	-3.09909	Down	1.93189e-246	4.15402e-244	cdna:known chromosome:WBcel235:IV:3932733:3936238:1 gene:Y46C8AL.3 gene_biotype:protein_coding transcript_biotype:protein_coding	-	-	-	-	gi|115534356|ref|NP_500439.2|/0/Protein CLEC-70 [Caenorhabditis elegans]
M01D1.2	2807	216	25	6.8117	0.803797	-3.08311	Down	1.42741e-38	6.33223e-37	cdna:known chromosome:WBcel235:II:1026028:1033664:1 gene:M01D1.2 gene_biotype:protein_coding transcript_biotype:protein_coding	-	-	-	-	gi|392889058|ref|NP_001040791.2|/0/Protein MATH-34, isoform a [Caenorhabditis elegans]
C45G7.2	489	86	11	15.568	2.03017	-2.93891	Down	1.67942e-15	3.42575e-14	cdna:known chromosome:WBcel235:IV:2467681:2468879:1 gene:C45G7.2 gene_biotype:protein_coding transcript_biotype:protein_coding	-	-	GO:0004553//hydrolase activity, hydrolyzing O-glycosyl compounds	GO:0009790//embryo development	gi|17539206|ref|NP_500207.1|/1.4874e-84/Protein ILYS-2 [Caenorhabditis elegans]
F49C12.7	1519	2576	385	150.118	22.8745	-2.71428	Down	0	0	cdna:known chromosome:WBcel235:IV:9309108:9311191:-1 gene:F49C12.7 gene_biotype:protein_coding transcript_biotype:protein_coding	-	-	GO:0016740//transferase activity	-	gi|115532856|ref|NP_001040948.1|/0/Protein F49C12.7, isoform b [Caenorhabditis elegans]
C08E3.7	1105	45	7	3.60491	0.571722	-2.65658	Down	5.8427e-08	6.78013e-07	cdna:known chromosome:WBcel235:II:1612788:1614059:-1 gene:C08E3.7 gene_biotype:protein_coding transcript_biotype:protein_coding	-	GO:0030529//ribonucleoprotein complex	GO:0005488//binding	GO:0010467//gene expression	gi|17531635|ref|NP_494012.1|/0/Protein FBXA-164 [Caenorhabditis elegans]
T05A10.5	1426	38	6	2.35889	0.379735	-2.63505	Down	7.46404e-07	7.59156e-06	cdna:known chromosome:WBcel235:X:10789678:10792018:-1 gene:T05A10.5 gene_biotype:protein_coding transcript_biotype:protein_coding	K02330	-	-	-	gi|392927151|ref|NP_509802.2|/0/Protein SCL-22 [Caenorhabditis elegans]
F40G12.5	895	113	18	11.1763	1.81509	-2.62234	Down	7.53512e-18	1.70656e-16	cdna:known chromosome:WBcel235:V:14269180:14270646:-1 gene:F40G12.5 gene_biotype:protein_coding transcript_biotype:protein_coding	-	-	-	-	gi|17560820|ref|NP_506532.1|/1.59934e-148/Protein F40G12.5 [Caenorhabditis elegans]
C03A7.12	919	112	19	10.7881	1.86589	-2.53151	Down	4.4886e-17	9.84852e-16	cdna:known chromosome:WBcel235:V:5178338:5181456:-1 gene:C03A7.12 gene_biotype:protein_coding transcript_biotype:protein_coding	K00699	GO:0031224//intrinsic to membrane	GO:0005488//binding;GO:0016757//transferase activity, transferring glycosyl groups	GO:0030258//lipid modification	gi|392918997|ref|NP_504389.2|/3.08624e-118/Protein C03A7.12 [Caenorhabditis elegans]
F35B12.2	1440	852	155	52.3747	9.71445	-2.43067	Down	1.96413e-114	2.3463e-112	cdna:known chromosome:WBcel235:V:11602312:11604563:-1 gene:F35B12.2 gene_biotype:protein_coding transcript_biotype:protein_coding	K00061;K11154;K13369	-	GO:0003824//catalytic activity;GO:0036094//small molecule binding	GO:0044710	gi|115534660|ref|NP_505941.3|/0/Protein DHS-20 [Caenorhabditis elegans]
F38E11.2	364	62	12	15.0777	2.97529	-2.34132	Down	2.77666e-09	3.66155e-08	cdna:known chromosome:WBcel235:IV:9446385:9446980:-1 gene:F38E11.2 gene_biotype:protein_coding transcript_biotype:protein_coding	K04455;K09545;K09542	GO:0044424//intracellular part	GO:0005515//protein binding	GO:0050896//response to stimulus	gi|17541102|ref|NP_501668.1|/5.67863e-51/Protein HSP-12.6 [Caenorhabditis elegans]
C31B8.12	1173	30	6	2.26395	0.461639	-2.29401	Down	5.26728e-05	0.000412822	cdna:known chromosome:WBcel235:V:2925178:2927722:-1 gene:C31B8.12 gene_biotype:protein_coding transcript_biotype:protein_coding	-	-	-	-	gi|392918568|ref|NP_503794.3|/0/Protein C31B8.12 [Caenorhabditis elegans]
F22G12.8	744	29	6	3.4504	0.727825	-2.2451	Down	8.80206e-05	0.000659866	cdna:known chromosome:WBcel235:I:13145600:13146453:1 gene:F22G12.8 gene_biotype:protein_coding transcript_biotype:protein_coding	-	-	-	-	gi|115532278|ref|NP_001040653.1|/2.32511e-133/Protein F22G12.8 [Caenorhabditis elegans]
F38E11.1	485	506	105	92.3535	19.5387	-2.24083	Down	2.03576e-62	1.353e-60	cdna:known chromosome:WBcel235:IV:9444788:9445324:-1 gene:F38E11.1 gene_biotype:protein_coding transcript_biotype:protein_coding	K09542	GO:0044449//contractile fiber part	GO:0005515//protein binding	GO:0050896//response to stimulus	gi|17541100|ref|NP_501667.1|/2.75851e-59/Protein HSP-12.3 [Caenorhabditis elegans]
F41H10.2	886	33	7	3.29704	0.713039	-2.20912	Down	3.2964e-05	0.000266703	cdna:known chromosome:WBcel235:IV:5381634:5383443:1 gene:F41H10.2 gene_biotype:protein_coding transcript_biotype:protein_coding	-	-	-	-	gi|17540324|ref|NP_500794.1|/5.62597e-67/Protein F41H10.2 [Caenorhabditis elegans]
T08G5.10	315	460	100	129.268	28.6509	-2.17372	Down	7.61832e-55	4.49161e-53	cdna:known chromosome:WBcel235:V:14018272:14018643:-1 gene:T08G5.10 gene_biotype:protein_coding transcript_biotype:protein_coding	-	-	-	GO:0006950//response to stress;GO:0010038//response to metal ion;GO:0010259//multicellular organismal aging;GO:0040009//regulation of growth rate	gi|17562720|ref|NP_506482.1|/3.7399e-18/Protein MTL-2 [Caenorhabditis elegans]
T07C4.4	502	3043	664	536.59	119.375	-2.16832	Down	0	0	cdna:known chromosome:WBcel235:III:10355118:10355668:-1 gene:T07C4.4 gene_biotype:protein_coding transcript_biotype:protein_coding	-	-	-	-	gi|71990561|ref|NP_499290.2|/8.29249e-28/Protein SPP-1 [Caenorhabditis elegans]
F08H9.5	1179	77	18	5.78124	1.37787	-2.06894	Down	7.95486e-10	1.08258e-08	cdna:known chromosome:WBcel235:V:14472535:14474372:1 gene:F08H9.5 gene_biotype:protein_coding transcript_biotype:protein_coding	K14616	-	GO:0005488//binding	-	gi|193207648|ref|NP_506588.2|/0/Protein CLEC-227 [Caenorhabditis elegans]
C40H1.2	627	47	11	6.63552	1.58334	-2.06724	Down	1.78057e-06	1.72188e-05	cdna:known chromosome:WBcel235:III:9318044:9319271:1 gene:C40H1.2 gene_biotype:protein_coding transcript_biotype:protein_coding	-	-	GO:0016787//hydrolase activity	-	gi|17552584|ref|NP_499050.1|/1.76541e-124/Protein C40H1.2 [Caenorhabditis elegans]
C30G7.1	903	2385	559	233.8	55.8693	-2.06515	Down	2.0314e-259	4.58369e-257	cdna:known chromosome:WBcel235:V:14949777:14952792:1 gene:C30G7.1 gene_biotype:protein_coding transcript_biotype:protein_coding	K11275	GO:0000785//chromatin;GO:0005856//cytoskeleton;GO:0031981//nuclear lumen	GO:0003676//nucleic acid binding	GO:0033057;GO:0033554//cellular response to stress;GO:0034728//nucleosome organization	gi|17558328|ref|NP_506680.1|/8.40405e-129/Protein HIL-1 [Caenorhabditis elegans]
C03A7.2	984	46	11	4.13816	1.0089	-2.03621	Down	2.88588e-06	2.73008e-05	cdna:known chromosome:WBcel235:V:5181912:5183717:1 gene:C03A7.2 gene_biotype:protein_coding transcript_biotype:protein_coding	-	-	-	GO:0033057;GO:0035264//multicellular organism growth;GO:0048806//genitalia development	gi|17557510|ref|NP_504390.1|/1.80233e-175/Protein C03A7.2 [Caenorhabditis elegans]
W07B8.4	1130	266	64	20.8376	5.11152	-2.02736	Down	9.11318e-30	3.22794e-28	cdna:known chromosome:WBcel235:V:1130088:1131930:-1 gene:W07B8.4 gene_biotype:protein_coding transcript_biotype:protein_coding	K01363	-	GO:0070011//peptidase activity, acting on L-amino acid peptides	GO:0019538//protein metabolic process	gi|17565162|ref|NP_503382.1|/0/Protein W07B8.4 [Caenorhabditis elegans]
F49E12.10	926	58	14	5.54449	1.36448	-2.02271	Down	1.57011e-07	1.73395e-06	cdna:known chromosome:WBcel235:II:8391088:8392281:1 gene:F49E12.10 gene_biotype:protein_coding transcript_biotype:protein_coding	K07750	GO:0031224//intrinsic to membrane	GO:0003824//catalytic activity;GO:0046914//transition metal ion binding	GO:0006631//fatty acid metabolic process	gi|17534225|ref|NP_495764.1|/1.25013e-167/Protein F49E12.10 [Caenorhabditis elegans]
W03G11.1	1095	181	45	14.6322	3.70892	-1.98007	Down	3.75064e-20	9.12789e-19	cdna:known chromosome:WBcel235:X:12105140:12106081:1 gene:W03G11.1 gene_biotype:protein_coding transcript_biotype:protein_coding	K09228;K14972;K14589	-	-	-	gi|115533544|ref|NP_001041295.1|/8.0517e-85/Protein COL-181, isoform a [Caenorhabditis elegans]
F08H9.9	1146	44	11	3.3987	0.866277	-1.97208	Down	7.49628e-06	6.69973e-05	cdna:known chromosome:WBcel235:V:14479284:14482195:1 gene:F08H9.9 gene_biotype:protein_coding transcript_biotype:protein_coding	K14616	-	-	-	gi|17559406|ref|NP_506591.1|/0/Protein CLEC-55 [Caenorhabditis elegans]
T15B7.16	1495	40	10	2.36844	0.603681	-1.97208	Down	1.9957e-05	0.000167703	cdna:known chromosome:WBcel235:V:6840216:6842970:-1 gene:T15B7.16 gene_biotype:protein_coding transcript_biotype:protein_coding	K05190	GO:0031224//intrinsic to membrane;GO:0097060//synaptic membrane	GO:0015276//ligand-gated ion channel activity	GO:0002164//larval development;GO:0010259//multicellular organismal aging;GO:0040009//regulation of growth rate;GO:0046903//secretion	gi|392919349|ref|NP_504741.3|/0/Protein LGC-54 [Caenorhabditis elegans]
C14A6.1	1008	2562	646	224.99	57.839	-1.95975	Down	3.6903e-260	8.43095e-258	cdna:known chromosome:WBcel235:V:18158027:18159610:1 gene:C14A6.1 gene_biotype:protein_coding transcript_biotype:protein_coding	K06560	-	GO:0030246//carbohydrate binding	-	gi|17557916|ref|NP_507547.1|/4.78536e-171/Protein CLEC-48 [Caenorhabditis elegans]
F45D11.1	1707	759	194	39.3598	10.2569	-1.94012	Down	2.24542e-77	1.79998e-75	cdna:known chromosome:WBcel235:II:1021505:1023520:1 gene:F45D11.1 gene_biotype:protein_coding transcript_biotype:protein_coding	-	-	-	-	gi|17534101|ref|NP_493883.1|/1.89351e-170/Protein F45D11.14 [Caenorhabditis elegans]
Y5H2B.5	1590	1447	374	80.5593	21.2287	-1.92404	Down	2.94762e-144	4.17625e-142	cdna:known chromosome:WBcel235:V:2198055:2201415:-1 gene:Y5H2B.5 gene_biotype:protein_coding transcript_biotype:protein_coding	K07427	-	GO:0016491//oxidoreductase activity;GO:0046906//tetrapyrrole binding;GO:0046914//transition metal ion binding	GO:0044710	gi|17565220|ref|NP_503598.1|/0/Protein CYP-32B1 [Caenorhabditis elegans]
C38D9.11	843	38	10	3.99025	1.07059	-1.89808	Down	5.11026e-05	0.000401721	cdna:pseudogene chromosome:WBcel235:V:17562221:17563115:1 gene:C38D9.11 gene_biotype:pseudogene transcript_biotype:pseudogene	-	-	GO:0005488//binding	-	gi|17561154|ref|NP_507392.1|/7.13519e-31/Protein FBXA-189 [Caenorhabditis elegans]
T26H5.8	1371	409	108	26.4077	7.10944	-1.89315	Down	3.69042e-41	1.72948e-39	cdna:known chromosome:WBcel235:V:15427161:15432566:-1 gene:T26H5.8 gene_biotype:protein_coding transcript_biotype:protein_coding	K00718	GO:0031224//intrinsic to membrane	GO:0031127//alpha-(1,2)-fucosyltransferase activity	-	gi|193208813|ref|NP_506839.2|/0/Protein T26H5.8 [Caenorhabditis elegans]
C14A6.16	2808	101	27	3.18397	0.867792	-1.87541	Down	3.89094e-11	5.77699e-10	cdna:pseudogene chromosome:WBcel235:V:18146965:18154396:1 gene:C14A6.16 gene_biotype:pseudogene transcript_biotype:pseudogene	K12301;K08193	GO:0031224//intrinsic to membrane	-	GO:0044763	gi|17562692|ref|NP_507831.1|/0/Protein M162.5 [Caenorhabditis elegans]
C40H1.9	1050	97	26	8.17762	2.23477	-1.87155	Down	1.00908e-10	1.45106e-09	cdna:known chromosome:WBcel235:III:9320040:9321663:1 gene:C40H1.9 gene_biotype:protein_coding transcript_biotype:protein_coding	-	-	GO:0016787//hydrolase activity	-	gi|392896035|ref|NP_001021214.2|/0/Protein C40H1.9 [Caenorhabditis elegans]
C04F12.7	697	111	30	14.0973	3.88452	-1.85961	Down	5.52916e-12	8.76465e-11	cdna:known chromosome:WBcel235:I:9695708:9696762:-1 gene:C04F12.7 gene_biotype:protein_coding transcript_biotype:protein_coding	-	-	-	-	gi|17505478|ref|NP_492579.1|/1.91827e-99/Protein C04F12.7 [Caenorhabditis elegans]
F53A9.8	417	3493	951	741.493	205.823	-1.84903	Down	0	0	cdna:known chromosome:WBcel235:X:8718558:8718974:-1 gene:F53A9.8 gene_biotype:protein_coding transcript_biotype:protein_coding	-	-	-	-	-
C08E3.8	1296	117	32	7.99144	2.2284	-1.84245	Down	2.03124e-12	3.33258e-11	cdna:known chromosome:WBcel235:II:1614793:1616463:-1 gene:C08E3.8 gene_biotype:protein_coding transcript_biotype:protein_coding	-	-	GO:0005488//binding	-	gi|17531637|ref|NP_494013.1|/0/Protein FBXA-165 [Caenorhabditis elegans]
W02D7.11	252	62	17	21.7789	6.08832	-1.83881	Down	3.54684e-07	3.77112e-06	cdna:known chromosome:WBcel235:V:8302887:8304469:-1 gene:W02D7.11 gene_biotype:protein_coding transcript_biotype:protein_coding	-	-	-	-	gi|25155143|ref|NP_741575.1|/9.61345e-27/Protein W02D7.11 [Caenorhabditis elegans]
Y47H9C.1	1174	40	11	3.01603	0.845616	-1.83458	Down	4.81618e-05	0.000380568	cdna:known chromosome:WBcel235:I:11830985:11833166:-1 gene:Y47H9C.1 gene_biotype:protein_coding transcript_biotype:protein_coding	-	-	-	GO:0010259//multicellular organismal aging	gi|17510051|ref|NP_493006.1|/0/Protein Y47H9C.1 [Caenorhabditis elegans]
F55A12.4	1383	1280	354	81.928	23.101	-1.8264	Down	3.06026e-119	3.75385e-117	cdna:known chromosome:WBcel235:I:5354288:5357028:1 gene:F55A12.4 gene_biotype:protein_coding transcript_biotype:protein_coding	K00061;K11154;K13369	GO:0031224//intrinsic to membrane	GO:0003824//catalytic activity;GO:0036094//small molecule binding	GO:0044710	gi|32563807|ref|NP_871814.1|/2.23308e-130/Protein DHS-2, isoform b [Caenorhabditis elegans]
C52E4.1	1117	38837	10742	3077.78	867.922	-1.82625	Down	0	0	cdna:known chromosome:WBcel235:V:11975515:11976759:1 gene:C52E4.1 gene_biotype:protein_coding transcript_biotype:protein_coding	K01363	-	GO:0070011//peptidase activity, acting on L-amino acid peptides	GO:0009790//embryo development;GO:0010259//multicellular organismal aging;GO:0019538//protein metabolic process	gi|32566081|ref|NP_506002.2|/0/Protein CPR-1 [Caenorhabditis elegans]
C24F3.6	1144	155	43	11.9936	3.39228	-1.82194	Down	8.88282e-16	1.8449e-14	cdna:known chromosome:WBcel235:IV:10216450:10217485:1 gene:C24F3.6 gene_biotype:protein_coding transcript_biotype:protein_coding	K06236	GO:0031224//intrinsic to membrane	GO:0005198//structural molecule activity	GO:0002164//larval development;GO:0006897//endocytosis;GO:0009653//anatomical structure morphogenesis;GO:0010876//lipid localization	gi|17538760|ref|NP_501867.1|/1.56724e-67/Protein COL-124 [Caenorhabditis elegans]
F15E11.12	543	126	35	20.5407	5.81724	-1.82008	Down	4.50594e-13	7.67522e-12	cdna:known chromosome:WBcel235:V:2326679:2327262:1 gene:F15E11.12 gene_biotype:protein_coding transcript_biotype:protein_coding	-	-	-	-	gi|459683618|emb|CCU83358.1|/1.20621e-92/Protein PUD-4, isoform a [Caenorhabditis elegans]
T19C9.8	1118	211	61	16.7065	4.92421	-1.76244	Down	4.40432e-20	1.06761e-18	cdna:known chromosome:WBcel235:V:17239097:17240656:1 gene:T19C9.8 gene_biotype:protein_coding transcript_biotype:protein_coding	-	-	-	-	gi|392922522|ref|NP_507367.2|/0/Protein T19C9.8 [Caenorhabditis elegans]
F15A4.8	2612	630	186	21.3507	6.42671	-1.73213	Down	1.6858e-55	1.01688e-53	cdna:known chromosome:WBcel235:II:12476290:12478926:-1 gene:F15A4.8 gene_biotype:protein_coding transcript_biotype:protein_coding	K01183	GO:0031224//intrinsic to membrane	GO:0004553//hydrolase activity, hydrolyzing O-glycosyl compounds	GO:0006026;GO:0040009//regulation of growth rate;GO:0044238//primary metabolic process	gi|392892067|ref|NP_001254344.1|/0/Protein F15A4.8, isoform c [Caenorhabditis elegans]
K03H6.7	515	145	43	24.9233	7.53546	-1.72573	Down	6.964e-14	1.26396e-12	cdna:known chromosome:WBcel235:IV:1515528:1516627:-1 gene:K03H6.7 gene_biotype:protein_coding transcript_biotype:protein_coding	K06559	-	-	GO:0040009//regulation of growth rate	gi|115532884|ref|NP_001040962.1|/8.13889e-90/Protein CLEC-172 [Caenorhabditis elegans]
ZK666.6	1300	6686	2019	455.268	140.166	-1.69958	Down	0	0	cdna:known chromosome:WBcel235:II:10480102:10481846:-1 gene:ZK666.6 gene_biotype:protein_coding transcript_biotype:protein_coding	-	-	-	-	gi|17537921|ref|NP_496259.1|/0/Protein CLEC-60 [Caenorhabditis elegans]
T05A1.2	1006	166	51	14.6068	4.57531	-1.6747	Down	4.22902e-15	8.38328e-14	cdna:known chromosome:WBcel235:IV:9563360:9564471:1 gene:T05A1.2 gene_biotype:protein_coding transcript_biotype:protein_coding	-	-	-	GO:0002164//larval development;GO:0006897//endocytosis;GO:0009653//anatomical structure morphogenesis;GO:0010876//lipid localization	gi|17542184|ref|NP_501700.1|/3.89722e-56/Protein COL-122 [Caenorhabditis elegans]
F28D1.5	793	3438	1062	383.775	120.865	-1.66687	Down	3.81768e-279	9.55832e-277	cdna:known chromosome:WBcel235:IV:12383168:12384007:1 gene:F28D1.5 gene_biotype:protein_coding transcript_biotype:protein_coding	-	-	-	GO:0006950//response to stress	gi|17540038|ref|NP_502362.1|/6.68807e-121/Protein THN-2 [Caenorhabditis elegans]
C03A7.13	954	132	41	12.2481	3.87868	-1.65892	Down	3.76398e-12	6.03988e-11	cdna:known chromosome:WBcel235:V:5191130:5192531:-1 gene:C03A7.13 gene_biotype:protein_coding transcript_biotype:protein_coding	K00699	GO:0031224//intrinsic to membrane	GO:0016757//transferase activity, transferring glycosyl groups	GO:0044238//primary metabolic process;GO:0071704	gi|17557532|ref|NP_504392.1|/4.99396e-159/Protein C03A7.13 [Caenorhabditis elegans]
Y54G2A.8	1489	1211	382	71.9936	23.1535	-1.63664	Down	4.6211e-97	4.59021e-95	cdna:known chromosome:WBcel235:IV:2835714:2838593:1 gene:Y54G2A.8 gene_biotype:protein_coding transcript_biotype:protein_coding	-	-	-	-	gi|71998083|ref|NP_001023507.1|/0/Protein CLEC-82, isoform a [Caenorhabditis elegans]
F22B5.4	562	1395	442	219.726	70.9798	-1.63023	Down	6.55342e-111	7.43956e-109	cdna:known chromosome:WBcel235:II:8452125:8452679:1 gene:F22B5.4 gene_biotype:protein_coding transcript_biotype:protein_coding	-	-	-	GO:0002164//larval development;GO:0009790//embryo development;GO:0040009//regulation of growth rate	gi|17533397|ref|NP_495781.1|/5.92129e-85/Protein F22B5.4 [Caenorhabditis elegans]
D2092.3	1445	44	14	2.69544	0.874398	-1.62416	Down	8.8592e-05	0.000663333	cdna:known chromosome:WBcel235:I:6621628:6624894:-1 gene:D2092.3 gene_biotype:protein_coding transcript_biotype:protein_coding	K05312	GO:0031224//intrinsic to membrane;GO:0044464//cell part;GO:0097060//synaptic membrane	GO:0004888//transmembrane signaling receptor activity;GO:0005231//excitatory extracellular ligand-gated ion channel activity	GO:0007267//cell-cell signaling;GO:0044765	gi|17505236|ref|NP_491906.1|/0/Protein ACR-11 [Caenorhabditis elegans]
F28F8.2	2077	13390	4323	570.675	187.844	-1.60313	Down	0	0	cdna:known chromosome:WBcel235:V:15567394:15569889:1 gene:F28F8.2 gene_biotype:protein_coding transcript_biotype:protein_coding	K00666;K01897	GO:0043231//intracellular membrane-bounded organelle	-	GO:0002164//larval development;GO:0009790//embryo development;GO:0010876//lipid localization;GO:0012501//programmed cell death;GO:0032787//monocarboxylic acid metabolic process;GO:0035088//establishment or maintenance of apical/basal cell polarity	gi|17560308|ref|NP_506869.1|/0/Protein ACS-2 [Caenorhabditis elegans]
T03E6.8	1893	638	206	29.8342	9.82122	-1.60299	Down	1.70539e-50	9.5906e-49	cdna:known chromosome:WBcel235:V:16600567:16603369:-1 gene:T03E6.8 gene_biotype:protein_coding transcript_biotype:protein_coding	K08473	-	-	-	gi|392922430|ref|NP_507200.3|/4.81559e-169/Protein T03E6.8 [Caenorhabditis elegans]
Y48G9A.10	2210	43	14	1.72235	0.571722	-1.59099	Down	0.000135053	0.000980677	cdna:known chromosome:WBcel235:III:2082819:2088272:1 gene:Y48G9A.10 gene_biotype:protein_coding transcript_biotype:protein_coding	K08765	GO:0031224//intrinsic to membrane	GO:0016740//transferase activity	-	gi|71994370|ref|NP_497498.2|/0/Protein CPT-3 [Caenorhabditis elegans]
C25E10.2	1491	745	243	44.2306	14.7088	-1.58837	Down	6.35628e-58	4.00599e-56	cdna:known chromosome:WBcel235:V:9041330:9043677:1 gene:C25E10.2 gene_biotype:protein_coding transcript_biotype:protein_coding	K07411;K00493	GO:0031224//intrinsic to membrane	GO:0016491//oxidoreductase activity;GO:0046906//tetrapyrrole binding;GO:0046914//transition metal ion binding	GO:0040009//regulation of growth rate;GO:0044710	gi|71984968|ref|NP_505342.2|/0/Protein CYP-33B1 [Caenorhabditis elegans]
F01D5.9	1565	900	296	50.9064	17.0697	-1.57641	Down	7.22204e-69	5.19674e-67	cdna:known chromosome:WBcel235:II:14013821:14016964:-1 gene:F01D5.9 gene_biotype:protein_coding transcript_biotype:protein_coding	K07427	-	GO:0016491//oxidoreductase activity;GO:0046906//tetrapyrrole binding;GO:0046914//transition metal ion binding	GO:0044710	gi|71985409|ref|NP_496939.2|/0/Protein CYP-37A1 [Caenorhabditis elegans]
Y42H9AR.5	735	85	28	10.2371	3.43811	-1.57412	Down	8.51636e-08	9.70408e-07	cdna:known chromosome:WBcel235:IV:8102516:8104565:1 gene:Y42H9AR.5 gene_biotype:protein_coding transcript_biotype:protein_coding	K12481	-	-	-	gi|17543366|ref|NP_501351.1|/3.24218e-47/Protein Y42H9AR.5 [Caenorhabditis elegans]
T10B9.9	485	51	17	9.30835	3.16341	-1.55704	Down	4.13304e-05	0.000329436	cdna:known chromosome:WBcel235:II:9775135:9775883:-1 gene:T10B9.9 gene_biotype:protein_coding transcript_biotype:protein_coding	-	-	-	-	gi|32565573|ref|NP_496107.2|/9.16171e-63/Protein T10B9.9 [Caenorhabditis elegans]
F49E12.9	1150	54	18	4.15662	1.41261	-1.55704	Down	2.43178e-05	0.000201294	cdna:known chromosome:WBcel235:II:8388125:8389891:1 gene:F49E12.9 gene_biotype:protein_coding transcript_biotype:protein_coding	K07750	GO:0031224//intrinsic to membrane	GO:0003824//catalytic activity;GO:0046914//transition metal ion binding	GO:0006631//fatty acid metabolic process	gi|193204606|ref|NP_001122612.1|/6.07272e-109/Protein F49E12.9, isoform b [Caenorhabditis elegans]
Y19D10B.7	483	188	64	34.4552	11.9586	-1.52667	Down	5.54806e-15	1.09152e-13	cdna:known chromosome:WBcel235:V:2322038:2322566:-1 gene:Y19D10B.7 gene_biotype:protein_coding transcript_biotype:protein_coding	-	-	-	-	gi|17559734|ref|NP_503641.1|/1.45255e-84/Protein PUD-1.1 [Caenorhabditis elegans]
F11G11.11	1057	88	30	7.36974	2.5615	-1.52462	Down	1.01042e-07	1.13856e-06	cdna:known chromosome:WBcel235:II:4869607:4870791:-1 gene:F11G11.11 gene_biotype:protein_coding transcript_biotype:protein_coding	-	GO:0031224//intrinsic to membrane	-	GO:0006950//response to stress;GO:0009653//anatomical structure morphogenesis;GO:0010876//lipid localization	gi|71986144|ref|NP_494879.2|/2.0736e-55/Protein COL-20 [Caenorhabditis elegans]
F45D11.14	1527	166	57	9.62307	3.36887	-1.51423	Down	2.96988e-13	5.13048e-12	cdna:known chromosome:WBcel235:II:1004616:1006475:-1 gene:F45D11.14 gene_biotype:protein_coding transcript_biotype:protein_coding	-	-	-	-	gi|17534101|ref|NP_493883.1|/0/Protein F45D11.14 [Caenorhabditis elegans]
C45E5.3	1051	69	24	5.81153	2.0609	-1.49564	Down	3.45454e-06	3.2296e-05	cdna:known chromosome:WBcel235:IV:5739692:5740986:1 gene:C45E5.3 gene_biotype:protein_coding transcript_biotype:protein_coding	K01183	-	-	GO:0040009//regulation of growth rate	gi|17539200|ref|NP_500855.1|/2.14457e-153/Protein C45E5.3 [Caenorhabditis elegans]
F49E11.10	762	18465	6482	2145.06	767.72	-1.48236	Down	0	0	cdna:known chromosome:WBcel235:IV:13057678:13059092:1 gene:F49E11.10 gene_biotype:protein_coding transcript_biotype:protein_coding	-	-	-	-	gi|17540542|ref|NP_502503.1|/4.69087e-121/Protein SCL-2, isoform a [Caenorhabditis elegans]
F28D1.3	702	318	112	40.0991	14.3989	-1.47761	Down	3.07366e-23	8.53758e-22	cdna:known chromosome:WBcel235:IV:12380104:12380857:1 gene:F28D1.3 gene_biotype:protein_coding transcript_biotype:protein_coding	-	-	-	GO:0006950//response to stress	gi|17540034|ref|NP_502360.1|/3.06218e-121/Protein THN-1 [Caenorhabditis elegans]
W06D12.3	2335	1587	562	60.1637	21.7219	-1.46974	Down	1.90646e-108	2.12465e-106	cdna:known chromosome:WBcel235:V:17723780:17726825:1 gene:W06D12.3 gene_biotype:protein_coding transcript_biotype:protein_coding	K00507	GO:0031090//organelle membrane;GO:0031224//intrinsic to membrane	GO:0016215	GO:0001676//long-chain fatty acid metabolic process;GO:0002164//larval development;GO:0006897//endocytosis;GO:0009409//response to cold;GO:0009790//embryo development;GO:0010259//multicellular organismal aging;GO:0010876//lipid localization;GO:0033057;GO:0035264//multicellular organism growth;GO:0040009//regulation of growth rate	gi|17561774|ref|NP_507482.1|/0/Protein FAT-5 [Caenorhabditis elegans]
C01G6.7	1687	527	187	27.6529	10.004	-1.46685	Down	4.47148e-37	1.89179e-35	cdna:known chromosome:WBcel235:II:9292017:9294041:1 gene:C01G6.7 gene_biotype:protein_coding transcript_biotype:protein_coding	K00666;K1127;K01904	-	-	-	gi|17531443|ref|NP_495979.1|/0/Protein ACS-7 [Caenorhabditis elegans]
C17C3.15	594	87	31	12.9651	4.71003	-1.46083	Down	2.90912e-07	3.12581e-06	cdna:known chromosome:WBcel235:II:5571302:5571965:1 gene:C17C3.15 gene_biotype:protein_coding transcript_biotype:protein_coding	-	-	-	-	gi|17531887|ref|NP_495078.1|/3.24733e-98/Protein C17C3.15 [Caenorhabditis elegans]
C06C3.11	912	53	19	5.14429	1.88022	-1.45207	Down	7.14524e-05	0.00054346	cdna:pseudogene chromosome:WBcel235:II:9378557:9379596:1 gene:C06C3.11 gene_biotype:pseudogene transcript_biotype:pseudogene	-	-	-	-	gi|17564170|ref|NP_506746.1|/3.02362e-33/Protein FBXA-84 [Caenorhabditis elegans]
Y46C8AR.1	1689	371	133	19.4441	7.10675	-1.45207	Down	3.33212e-26	1.05002e-24	cdna:known chromosome:WBcel235:IV:3965332:3969025:1 gene:Y46C8AR.1 gene_biotype:protein_coding transcript_biotype:protein_coding	-	-	-	-	gi|25148869|ref|NP_500449.2|/0/Protein CLEC-76 [Caenorhabditis elegans]
Y32B12C.5	1953	715	257	32.4077	11.8763	-1.44826	Down	8.51714e-49	4.66071e-47	cdna:pseudogene chromosome:WBcel235:V:16603529:16610952:-1 gene:Y32B12C.5 gene_biotype:pseudogene transcript_biotype:pseudogene	-	-	-	-	gi|193209229|ref|NP_001123066.1|/1.42594e-61/Protein Y70C5A.3 [Caenorhabditis elegans]
D1086.1	797	99	36	10.9957	4.07655	-1.43151	Down	6.93738e-08	7.9745e-07	cdna:known chromosome:WBcel235:V:14098847:14100477:1 gene:D1086.1 gene_biotype:protein_coding transcript_biotype:protein_coding	-	-	-	-	gi|17559130|ref|NP_506498.1|/2.26433e-84/Protein D1086.1 [Caenorhabditis elegans]
T08A9.7	431	3162	1155	649.425	241.854	-1.42503	Down	1.57538e-204	2.85081e-202	cdna:known chromosome:WBcel235:X:7314883:7315355:-1 gene:T08A9.7 gene_biotype:protein_coding transcript_biotype:protein_coding	K12382	-	GO:0022803	GO:0002164//larval development;GO:0010876//lipid localization;GO:0040009//regulation of growth rate;GO:0042742//defense response to bacterium	gi|25513472|pir||B89567/2.25219e-52/protein T08A9.7 [imported] - Caenorhabditis elegans
B0284.5	1430	91	34	5.63313	2.14581	-1.39241	Down	4.1647e-07	4.38217e-06	cdna:pseudogene chromosome:WBcel235:III:4373179:4375323:1 gene:B0284.5 gene_biotype:pseudogene transcript_biotype:pseudogene	-	-	-	-	gi|133904681|ref|NP_497882.3|/3.77447e-21/Protein B0284.1 [Caenorhabditis elegans]
Y14H12A.2	494	72	27	12.9018	4.93271	-1.38712	Down	7.36518e-06	6.59546e-05	cdna:known chromosome:WBcel235:II:3988700:3989685:-1 gene:Y14H12A.2 gene_biotype:protein_coding transcript_biotype:protein_coding	-	-	-	-	gi|193205100|ref|NP_001022410.2|/8.43492e-59/Protein Y14H12A.2 [Caenorhabditis elegans]
F46B6.8	1423	1223	460	76.0792	29.1744	-1.3828	Down	8.66188e-77	6.82384e-75	cdna:known chromosome:WBcel235:V:9791571:9793391:1 gene:F46B6.8 gene_biotype:protein_coding transcript_biotype:protein_coding	K01052;K14452;K01046	-	GO:0016787//hydrolase activity	GO:0006629//lipid metabolic process;GO:0007059//chromosome segregation;GO:0010876//lipid localization	gi|17561046|ref|NP_505527.1|/0/Protein LIPL-2 [Caenorhabditis elegans]
W02A2.1	1277	33289	12553	2307.57	887.167	-1.37909	Down	0	0	cdna:known chromosome:WBcel235:IV:13323858:13326394:1 gene:W02A2.1 gene_biotype:protein_coding transcript_biotype:protein_coding	K10257;K10256	GO:0031224//intrinsic to membrane	GO:0016215	GO:0002164//larval development;GO:0006633//fatty acid biosynthetic process;GO:0006897//endocytosis;GO:0009790//embryo development;GO:0010876//lipid localization;GO:0033057;GO:0035264//multicellular organism growth;GO:0040009//regulation of growth rate;GO:0042335//cuticle development	gi|17542730|ref|NP_502560.1|/0/Protein FAT-2 [Caenorhabditis elegans]
F07G6.7	1018	74	28	6.4347	2.48233	-1.37418	Down	6.38362e-06	5.75597e-05	cdna:known chromosome:WBcel235:X:1716433:1718568:-1 gene:F07G6.7 gene_biotype:protein_coding transcript_biotype:protein_coding	-	-	-	-	gi|115534941|ref|NP_508315.2|/8.5538e-176/Protein FBXA-53 [Caenorhabditis elegans]
K08C7.5	1677	931	354	49.1429	19.0511	-1.36711	Down	6.73356e-58	4.22918e-56	cdna:known chromosome:WBcel235:IV:10682524:10684385:1 gene:K08C7.5 gene_biotype:protein_coding transcript_biotype:protein_coding	K08;K00485	GO:0005789//endoplasmic reticulum membrane;GO:0031224//intrinsic to membrane	GO:0000166//nucleotide binding;GO:0016709//oxidoreductase activity, acting on paired donors, with incorporation or reduction of molecular oxygen, NAD(P)H as one donor, and incorporation of one atom of oxygen	GO:0044710	gi|17541300|ref|NP_501972.1|/0/Protein FMO-2 [Caenorhabditis elegans]
C36A4.2	1509	1008	384	59.1311	22.9663	-1.3644	Down	2.34348e-62	1.55188e-60	cdna:known chromosome:WBcel235:III:3835221:3837150:1 gene:C36A4.2 gene_biotype:protein_coding transcript_biotype:protein_coding	K07424	GO:0031224//intrinsic to membrane	GO:0016491//oxidoreductase activity;GO:0046906//tetrapyrrole binding;GO:0046914//transition metal ion binding	GO:0044710	gi|71982977|ref|NP_497776.2|/0/Protein CYP-25A2 [Caenorhabditis elegans]
Y34F4.2	632	389	149	54.485	21.2774	-1.35654	Down	7.08554e-25	2.12997e-23	cdna:known chromosome:WBcel235:III:1010560:1011371:1 gene:Y34F4.2 gene_biotype:protein_coding transcript_biotype:protein_coding	-	-	-	-	gi|193210719|ref|NP_001122726.1|/2.43751e-101/Protein Y34F4.2, isoform b [Caenorhabditis elegans]
T14B4.4	897	621	239	61.2835	24.0466	-1.34966	Down	1.8439e-38	8.14032e-37	cdna:known chromosome:WBcel235:II:6718756:6720279:1 gene:T14B4.4 gene_biotype:protein_coding transcript_biotype:protein_coding	K06497;K06489	GO:0031224//intrinsic to membrane	-	-	gi|115532580|ref|NP_001040805.1|/8.00463e-112/Protein TSP-10, isoform a [Caenorhabditis elegans]
T07G12.5	1858	469	182	22.3445	8.84045	-1.33773	Down	4.51604e-29	1.5428e-27	cdna:known chromosome:WBcel235:IV:10541430:10545091:-1 gene:T07G12.5 gene_biotype:protein_coding transcript_biotype:protein_coding	K14611	GO:0031224//intrinsic to membrane	-	GO:0044763;GO:0051234//establishment of localization	gi|212646146|ref|NP_001129868.1|/2.16138e-90/Protein T07G12.5, isoform b [Caenorhabditis elegans]
E02H4.4	1557	221	86	12.5646	4.98493	-1.33372	Down	1.92244e-14	3.65243e-13	cdna:known chromosome:WBcel235:X:14257969:14262435:1 gene:E02H4.4 gene_biotype:protein_coding transcript_biotype:protein_coding	-	-	-	-	gi|392927900|ref|NP_510379.3|/0/Protein E02H4.4 [Caenorhabditis elegans]
T08A9.8	402	59	23	12.9918	5.16358	-1.33116	Down	8.60406e-05	0.000646879	cdna:known chromosome:WBcel235:X:7318275:7318776:-1 gene:T08A9.8 gene_biotype:protein_coding transcript_biotype:protein_coding	-	-	GO:0022803	GO:0002164//larval development;GO:0010876//lipid localization;GO:0040009//regulation of growth rate;GO:0042742//defense response to bacterium	gi|17569695|ref|NP_509237.1|/2.08805e-45/Protein SPP-4 [Caenorhabditis elegans]
F15E11.15	778	223	87	25.3729	10.0923	-1.33004	Down	1.66594e-14	3.17171e-13	cdna:known chromosome:WBcel235:V:2324510:2325156:-1 gene:F15E11.15 gene_biotype:protein_coding transcript_biotype:protein_coding	-	-	-	-	gi|71989876|ref|NP_001023804.1|/2.13649e-124/Protein PUD-3, isoform a [Caenorhabditis elegans]
F08H9.8	1259	135	53	9.49188	3.79926	-1.32098	Down	3.00254e-09	3.93669e-08	cdna:known chromosome:WBcel235:V:14476911:14478997:1 gene:F08H9.8 gene_biotype:protein_coding transcript_biotype:protein_coding	K14616	-	GO:0005488//binding	-	gi|71988826|ref|NP_506590.2|/0/Protein CLEC-54 [Caenorhabditis elegans]
T07H3.3	1446	1380	544	84.4803	33.9531	-1.31507	Down	3.7997e-80	3.12825e-78	cdna:known chromosome:WBcel235:II:1577369:1579986:-1 gene:T07H3.3 gene_biotype:protein_coding transcript_biotype:protein_coding	-	-	-	-	gi|392889146|ref|NP_494001.3|/0/Protein MATH-38 [Caenorhabditis elegans]
M01B2.1	1604	76	30	4.19424	1.68797	-1.31312	Down	9.95482e-06	8.71798e-05	cdna:known chromosome:WBcel235:V:15244756:15247707:1 gene:M01B2.1 gene_biotype:protein_coding transcript_biotype:protein_coding	K05096;K08252	-	GO:0016301//kinase activity	GO:0009987//cellular process;GO:0044699	gi|392922123|ref|NP_506771.3|/0/Protein KIN-30 [Caenorhabditis elegans]
F18E3.13	505	194	77	34.0059	13.7609	-1.30521	Down	1.76086e-12	2.90463e-11	cdna:known chromosome:WBcel235:V:7416116:7416819:1 gene:F18E3.13 gene_biotype:protein_coding transcript_biotype:protein_coding	-	-	-	-	gi|193207777|ref|NP_001122923.1|/7.42031e-32/Protein F18E3.13 [Caenorhabditis elegans]
Y49E10.16	1095	1486	592	120.129	48.7929	-1.29985	Down	1.17465e-84	1.03216e-82	cdna:known chromosome:WBcel235:III:12431639:12433865:1 gene:Y49E10.16 gene_biotype:protein_coding transcript_biotype:protein_coding	-	-	GO:0016298//lipase activity;GO:0016787//hydrolase activity	GO:0044238//primary metabolic process	gi|392896955|ref|NP_001255168.1|/5.92022e-124/Protein Y49E10.16, isoform a [Caenorhabditis elegans]
F58B3.1	724	6916	2771	845.592	345.419	-1.29161	Down	0	0	cdna:known chromosome:WBcel235:IV:11621443:11623124:-1 gene:F58B3.1 gene_biotype:protein_coding transcript_biotype:protein_coding	-	-	GO:0004553//hydrolase activity, hydrolyzing O-glycosyl compounds	GO:0000270//peptidoglycan metabolic process;GO:0044036//cell wall macromolecule metabolic process;GO:0044238//primary metabolic process	gi|17540786|ref|NP_502192.1|/6.32776e-117/Protein LYS-4 [Caenorhabditis elegans]
Y46C8AL.9	2018	217	87	9.51882	3.89087	-1.29069	Down	1.40268e-13	2.48177e-12	cdna:known chromosome:WBcel235:IV:3960734:3964657:1 gene:Y46C8AL.9 gene_biotype:protein_coding transcript_biotype:protein_coding	K06560	-	-	-	gi|193206806|ref|NP_001122813.1|/0/Protein CLEC-75, isoform c [Caenorhabditis elegans]
T05G5.12	368	114	46	27.4221	11.2813	-1.28141	Down	1.0348e-07	1.1646e-06	cdna:known chromosome:WBcel235:III:9735263:9736028:-1 gene:T05G5.12 gene_biotype:protein_coding transcript_biotype:protein_coding	-	-	-	-	gi|25149741|ref|NP_741265.1|/1.96463e-19/Protein DAO-6 [Caenorhabditis elegans]
Y46C8AL.5	1493	2706	1100	160.44	66.4939	-1.27074	Down	2.20228e-147	3.24605e-145	cdna:known chromosome:WBcel235:IV:3944807:3947364:1 gene:Y46C8AL.5 gene_biotype:protein_coding transcript_biotype:protein_coding	-	-	-	-	gi|71997638|ref|NP_500442.3|/0/Protein CLEC-72 [Caenorhabditis elegans]
T07H3.6	1078	237	97	19.4614	8.12086	-1.26091	Down	3.16088e-14	5.89504e-13	cdna:known chromosome:WBcel235:II:1599462:1600714:-1 gene:T07H3.6 gene_biotype:protein_coding transcript_biotype:protein_coding	-	-	-	-	gi|32564811|ref|NP_494005.2|/0/Protein BATH-26 [Caenorhabditis elegans]
W08D2.4	1491	15826	6496	939.589	393.203	-1.25675	Down	0	0	cdna:known chromosome:WBcel235:IV:9805674:9806118:1 gene:W08D2.4 gene_biotype:protein_coding transcript_biotype:protein_coding	K10226;K13076;K10225	GO:0031224//intrinsic to membrane	GO:0016215;GO:0046906//tetrapyrrole binding;GO:0046914//transition metal ion binding	GO:0003012//muscle system process;GO:0006633//fatty acid biosynthetic process;GO:0006837//serotonin transport;GO:0007269//neurotransmitter secretion;GO:0007588//excretion;GO:0010259//multicellular organismal aging;GO:0010927;GO:0016192//vesicle-mediated transport;GO:0033036;GO:0033057;GO:0040009//regulation of growth rate;GO:0042335//cuticle development;GO:0042755//eating behavior	gi|484399547|emb|CCW46010.1|/9.73054e-51/Protein FAT-3, isoform d [Caenorhabditis elegans]
Y40B10A.6	796	63	26	7.00603	2.94788	-1.24892	Down	0.000111444	0.000822307	cdna:known chromosome:WBcel235:V:2049223:2050172:-1 gene:Y40B10A.6 gene_biotype:protein_coding transcript_biotype:protein_coding	-	-	GO:0008168//methyltransferase activity	GO:0040009//regulation of growth rate	gi|17565612|ref|NP_503558.1|/1.49784e-128/Protein COMT-4 [Caenorhabditis elegans]
C08A9.1	833	121	50	12.8583	5.41719	-1.24709	Down	7.96968e-08	9.11526e-07	cdna:known chromosome:WBcel235:X:17092718:17094223:1 gene:C08A9.1 gene_biotype:protein_coding transcript_biotype:protein_coding	K04564	GO:0043231//intracellular membrane-bounded organelle	GO:0003824//catalytic activity;GO:0016209//antioxidant activity;GO:0043169//cation binding	GO:0002164//larval development;GO:0010259//multicellular organismal aging;GO:0044710;GO:0072593//reactive oxygen species metabolic process	gi|17569479|ref|NP_510764.1|/9.8145e-126/Protein SOD-3 [Caenorhabditis elegans]
F58B3.3	709	118	49	14.7326	6.23733	-1.24001	Down	1.31481e-07	1.46887e-06	cdna:known chromosome:WBcel235:IV:11626910:11627947:-1 gene:F58B3.3 gene_biotype:protein_coding transcript_biotype:protein_coding	-	-	GO:0004553//hydrolase activity, hydrolyzing O-glycosyl compounds	GO:0000270//peptidoglycan metabolic process;GO:0044036//cell wall macromolecule metabolic process;GO:0044238//primary metabolic process	gi|17540790|ref|NP_502194.1|/1.4015e-121/Protein LYS-6 [Caenorhabditis elegans]
F32A5.5	1026	4229	1759	364.867	154.727	-1.23764	Down	5.24706e-220	1.03119e-217	cdna:known chromosome:WBcel235:II:7235834:7237055:-1 gene:F32A5.5 gene_biotype:protein_coding transcript_biotype:protein_coding	K09886	GO:0031224//intrinsic to membrane;GO:0044459//plasma membrane part	GO:0005372//water transmembrane transporter activity;GO:0015267//channel activity	GO:0008643//carbohydrate transport;GO:0010259//multicellular organismal aging;GO:0042044//fluid transport;GO:0042742//defense response to bacterium	gi|17533613|ref|NP_495510.1|/6.6682e-170/Protein AQP-1, isoform a [Caenorhabditis elegans]
C24G6.6	1892	2151	896	100.638	42.7401	-1.23552	Down	1.41381e-112	1.64588e-110	cdna:known chromosome:WBcel235:V:5509933:5512707:-1 gene:C24G6.6 gene_biotype:protein_coding transcript_biotype:protein_coding	K12259	-	GO:0003824//catalytic activity	GO:0044710	gi|17558184|ref|NP_504456.1|/0/Protein HPO-15 [Caenorhabditis elegans]
K08F9.1	1523	67	28	3.89421	1.65923	-1.23082	Down	8.10108e-05	0.000611075	cdna:known chromosome:WBcel235:V:15137273:15139888:-1 gene:K08F9.1 gene_biotype:protein_coding transcript_biotype:protein_coding	K08142;K07299	GO:0031224//intrinsic to membrane	GO:0022857//transmembrane transporter activity	GO:0002164//larval development;GO:0009790//embryo development;GO:0044763;GO:0051234//establishment of localization	gi|193208335|ref|NP_506734.2|/0/Protein K08F9.1 [Caenorhabditis elegans]
F53H2.1	2840	126	53	3.92732	1.68425	-1.22144	Down	7.05564e-08	8.10025e-07	cdna:known chromosome:WBcel235:V:20387715:20393402:1 gene:F53H2.1 gene_biotype:protein_coding transcript_biotype:protein_coding	-	-	-	-	gi|392923190|ref|NP_507929.2|/0/Protein F53H2.1 [Caenorhabditis elegans]
C41D11.6	2827	83	35	2.59894	1.11735	-1.21784	Down	1.32389e-05	0.000114189	cdna:known chromosome:WBcel235:I:4460146:4462972:-1 gene:C41D11.6 gene_biotype:protein_coding transcript_biotype:protein_coding	-	-	-	-	gi|17505963|ref|NP_491376.1|/0/Protein C41D11.6 [Caenorhabditis elegans]
Y67H2A.8	1390	19451	8208	1238.72	532.931	-1.21682	Down	0	0	cdna:known chromosome:WBcel235:IV:13315642:13318783:1 gene:Y67H2A.8 gene_biotype:protein_coding transcript_biotype:protein_coding	K10257;K10256	GO:0031224//intrinsic to membrane	GO:0016215	GO:0002164//larval development;GO:0006633//fatty acid biosynthetic process;GO:0006897//endocytosis;GO:0009790//embryo development;GO:0010876//lipid localization;GO:0033057;GO:0035264//multicellular organism growth;GO:0040009//regulation of growth rate;GO:0042335//cuticle development	gi|71999459|ref|NP_001023560.1|/0/Protein FAT-1 [Caenorhabditis elegans]
M01H9.2	1334	97	41	6.43666	2.77381	-1.21444	Down	2.56924e-06	2.44191e-05	cdna:known chromosome:WBcel235:IV:4460179:4462061:-1 gene:M01H9.2 gene_biotype:protein_coding transcript_biotype:protein_coding	-	-	-	-	gi|115534369|ref|NP_500574.2|/0/Protein M01H9.2 [Caenorhabditis elegans]
D1086.2	727	92	39	11.2021	4.84149	-1.21024	Down	4.96898e-06	4.55228e-05	cdna:known chromosome:WBcel235:V:14097161:14098810:-1 gene:D1086.2 gene_biotype:protein_coding transcript_biotype:protein_coding	-	-	-	-	gi|17559132|ref|NP_506497.1|/1.88391e-100/Protein D1086.2, isoform a [Caenorhabditis elegans]
F52F10.3	2244	185	79	7.29782	3.17726	-1.19968	Down	1.14669e-10	1.64248e-09	cdna:known chromosome:WBcel235:V:1538353:1541824:-1 gene:F52F10.3 gene_biotype:protein_coding transcript_biotype:protein_coding	K00680	GO:0031224//intrinsic to membrane	GO:0016746//transferase activity, transferring acyl groups	GO:0040009//regulation of growth rate	gi|17561254|ref|NP_503441.1|/0/Protein OAC-31 [Caenorhabditis elegans]
F49H6.5	1307	340	148	23.0276	10.2196	-1.17202	Down	8.84094e-18	1.98508e-16	cdna:known chromosome:WBcel235:V:17023473:17025529:1 gene:F49H6.5 gene_biotype:protein_coding transcript_biotype:protein_coding	K03639	GO:0043234//protein complex	GO:0043169//cation binding;GO:0051536//iron-sulfur cluster binding	GO:0009108//coenzyme biosynthetic process;GO:0010259//multicellular organismal aging;GO:0018130;GO:0040009//regulation of growth rate	gi|17561210|ref|NP_507311.1|/0/Protein F49H6.5 [Caenorhabditis elegans]
F59F3.4	1633	291	127	15.7743	7.01886	-1.16827	Down	2.31512e-15	4.67552e-14	cdna:known chromosome:WBcel235:X:11004991:11008181:-1 gene:F59F3.4 gene_biotype:protein_coding transcript_biotype:protein_coding	-	GO:0005635//nuclear envelope;GO:0031224//intrinsic to membrane	GO:0005261//cation channel activity	GO:0006814//sodium ion transport;GO:0007588//excretion;GO:0009790//embryo development;GO:0040009//regulation of growth rate	gi|25152279|ref|NP_509838.2|/0/Protein DEL-5 [Caenorhabditis elegans]
T13C5.1	1994	492	216	21.8416	9.77636	-1.15971	Down	1.20197e-24	3.56052e-23	cdna:known chromosome:WBcel235:X:6198094:6200818:1 gene:T13C5.1 gene_biotype:protein_coding transcript_biotype:protein_coding	K07414;K07417	GO:0031224//intrinsic to membrane;GO:0044297//cell body;GO:0044444//cytoplasmic part	GO:0016491//oxidoreductase activity;GO:0046906//tetrapyrrole binding;GO:0046914//transition metal ion binding	GO:0002119//nematode larval development;GO:0007154//cell communication;GO:0016477//cell migration;GO:0044710	gi|71996285|ref|NP_001024903.1|/0/Protein DAF-9, isoform b [Caenorhabditis elegans]
F09F3.9	2290	305	134	11.7899	5.28102	-1.15866	Down	7.70552e-16	1.60953e-14	cdna:known chromosome:WBcel235:V:13873195:13875878:1 gene:F09F3.9 gene_biotype:protein_coding transcript_biotype:protein_coding	K08765	GO:0031224//intrinsic to membrane	GO:0016740//transferase activity	-	gi|25155169|ref|NP_741637.1|/0/Protein CPT-5 [Caenorhabditis elegans]
ZK1320.9	1572	2685	1181	151.195	67.8026	-1.15699	Down	2.16504e-126	2.74795e-124	cdna:known chromosome:WBcel235:II:9684096:9686713:-1 gene:ZK1320.9 gene_biotype:protein_coding transcript_biotype:protein_coding	-	-	GO:0003824//catalytic activity	GO:0006637//acyl-CoA metabolic process	gi|17538151|ref|NP_496090.1|/0/Protein ZK1320.9 [Caenorhabditis elegans]
C06G3.3	292	200	88	60.6306	27.1987	-1.15651	Down	7.46054e-11	1.08305e-09	cdna:known chromosome:WBcel235:IV:7036123:7036469:1 gene:C06G3.3 gene_biotype:protein_coding transcript_biotype:protein_coding	-	-	-	-	gi|17538508|ref|NP_501091.1|/7.92325e-21/Protein C06G3.3 [Caenorhabditis elegans]
B0238.13	2543	161	71	5.60433	2.51977	-1.15325	Down	5.69212e-09	7.29557e-08	cdna:known chromosome:WBcel235:V:5243729:5248040:-1 gene:B0238.13 gene_biotype:protein_coding transcript_biotype:protein_coding	K03927;K01044	-	-	-	gi|17557304|ref|NP_504401.1|/0/Protein B0238.13 [Caenorhabditis elegans]
ZK250.5	2547	223	99	7.75033	3.50796	-1.14362	Down	9.39192e-12	1.46339e-10	cdna:known chromosome:WBcel235:II:1937087:1939750:-1 gene:ZK250.5 gene_biotype:protein_coding transcript_biotype:protein_coding	-	-	-	-	gi|71998815|ref|NP_001022519.1|/0/Protein MATH-47, isoform b [Caenorhabditis elegans]
F48E8.3	1864	4639	2063	220.304	99.8854	-1.14115	Down	3.18034e-212	5.99248e-210	cdna:known chromosome:WBcel235:III:5461377:5464387:1 gene:F48E8.3 gene_biotype:protein_coding transcript_biotype:protein_coding	K00234	-	GO:0016627//oxidoreductase activity, acting on the CH-CH group of donors	GO:0010259//multicellular organismal aging;GO:0044710	gi|71986328|ref|NP_498164.3|/0/Protein F48E8.3 [Caenorhabditis elegans]
VZK822L.1	3488	7873	3515	199.806	90.9489	-1.13547	Down	0	0	cdna:known chromosome:WBcel235:IV:11913690:11915687:-1 gene:VZK822L.1 gene_biotype:protein_coding transcript_biotype:protein_coding	K00507;K822	GO:0031090//organelle membrane;GO:0031224//intrinsic to membrane	GO:0016215	GO:0001676//long-chain fatty acid metabolic process;GO:0002164//larval development;GO:0006897//endocytosis;GO:0009409//response to cold;GO:0009790//embryo development;GO:0010259//multicellular organismal aging;GO:0010876//lipid localization;GO:0033057;GO:0035264//multicellular organism growth;GO:0040009//regulation of growth rate	gi|392900994|ref|NP_001255596.1|/7.29885e-156/Protein FAT-6, isoform b [Caenorhabditis elegans]
C29F4.2	1859	311	139	14.809	6.74814	-1.13391	Down	1.26074e-15	2.59487e-14	cdna:known chromosome:WBcel235:IV:11226589:11230249:-1 gene:C29F4.2 gene_biotype:protein_coding transcript_biotype:protein_coding	K13881;K13880	-	-	GO:0035264//multicellular organism growth	gi|133930976|ref|NP_502108.2|/0/Protein BEST-7 [Caenorhabditis elegans]
Y75B8A.2	1548	522	235	29.85	13.7008	-1.12347	Down	7.69776e-25	2.30265e-23	cdna:known chromosome:WBcel235:III:12077788:12084320:-1 gene:Y75B8A.2 gene_biotype:protein_coding transcript_biotype:protein_coding	K09297;K09300	GO:0043231//intracellular membrane-bounded organelle	GO:0001071//nucleic acid binding transcription factor activity;GO:0003677//DNA binding	GO:0003002//regionalization;GO:0006351//transcription, DNA-dependent;GO:0009790//embryo development;GO:0010171//body morphogenesis;GO:0040009//regulation of growth rate	gi|71995941|ref|NP_001022941.1|/1.42192e-101/Protein NOB-1, isoform b [Caenorhabditis elegans]
C24B9.3	1598	4946	2239	273.982	126.452	-1.11549	Down	4.41492e-218	8.5842e-216	cdna:known chromosome:WBcel235:V:2706781:2711819:-1 gene:C24B9.3 gene_biotype:protein_coding transcript_biotype:protein_coding	K06481;K06238	GO:0016020//membrane;GO:0044464//cell part	GO:0005488//binding	GO:0044707;GO:0044763;GO:0048522//positive regulation of cellular process;GO:0050896//response to stimulus;GO:0051179//localization	gi|71984767|ref|NP_001023672.1|/0/Protein C24B9.3, isoform b [Caenorhabditis elegans]
T02B5.1	2109	1031	469	43.2739	20.0699	-1.10847	Down	1.80207e-46	9.51918e-45	cdna:known chromosome:WBcel235:V:14163250:14166730:-1 gene:T02B5.1 gene_biotype:protein_coding transcript_biotype:protein_coding	K03927;K01044	-	-	-	gi|17563740|ref|NP_506506.1|/0/Protein T02B5.1 [Caenorhabditis elegans]
Y18D10A.22	1002	90	41	7.95095	3.69288	-1.10638	Down	2.62652e-05	0.000216238	cdna:known chromosome:WBcel235:I:12932037:12933751:1 gene:Y18D10A.22 gene_biotype:protein_coding transcript_biotype:protein_coding	K04559;K370	-	GO:0008092//cytoskeletal protein binding;GO:0008289//lipid binding	GO:0001505//regulation of neurotransmitter levels;GO:0007588//excretion;GO:0007600//sensory perception;GO:0009612//response to mechanical stimulus;GO:0033036	gi|71993539|ref|NP_001021723.1|/0/Protein Y18D10A.22 [Caenorhabditis elegans]
F53A9.6	433	430	196	87.9073	40.8523	-1.10556	Down	3.0073e-20	7.33837e-19	cdna:known chromosome:WBcel235:X:8713463:8713952:-1 gene:F53A9.6 gene_biotype:protein_coding transcript_biotype:protein_coding	-	-	-	-	-
C52B9.3	1672	344	157	18.2124	8.47446	-1.10373	Down	1.83741e-16	3.92776e-15	cdna:known chromosome:WBcel235:X:4265882:4270486:1 gene:C52B9.3 gene_biotype:protein_coding transcript_biotype:protein_coding	-	-	-	-	gi|25151418|ref|NP_741765.1|/0/Protein COEL-1, isoform b [Caenorhabditis elegans]
K06A9.2	1863	231	106	10.976	5.13502	-1.09591	Down	2.04064e-11	3.09004e-10	cdna:known chromosome:WBcel235:X:1536417:1540287:1 gene:K06A9.2 gene_biotype:protein_coding transcript_biotype:protein_coding	K06;K10263	-	GO:0003677//DNA binding	GO:0006351//transcription, DNA-dependent	gi|25151037|ref|NP_508291.2|/0/Protein K06A9.2 [Caenorhabditis elegans]
B0035.13	1021	1914	883	165.944	78.0519	-1.08819	Down	2.67632e-82	2.27512e-80	cdna:known chromosome:WBcel235:IV:11304721:11306720:-1 gene:B0035.13 gene_biotype:protein_coding transcript_biotype:protein_coding	-	-	GO:0016298//lipase activity	GO:0044238//primary metabolic process	gi|17538234|ref|NP_502123.1|/1.47266e-143/Protein B0035.13 [Caenorhabditis elegans]
Y53F4B.30	742	493	229	58.8149	27.8535	-1.07832	Down	3.86578e-22	1.0225e-20	cdna:known chromosome:WBcel235:II:15164885:15165726:-1 gene:Y53F4B.30 gene_biotype:protein_coding transcript_biotype:protein_coding	K08;K00799;K01830	-	GO:0005488//binding	-	gi|17537487|ref|NP_497116.1|/3.6972e-115/Protein GST-27 [Caenorhabditis elegans]
M176.4	866	852	396	87.0896	41.2692	-1.07743	Down	4.90606e-37	2.07086e-35	cdna:known chromosome:WBcel235:II:9420480:9422199:1 gene:M176.4 gene_biotype:protein_coding transcript_biotype:protein_coding	-	GO:0031224//intrinsic to membrane	-	-	gi|32564994|ref|NP_496013.2|/1.0545e-133/Protein M176.4 [Caenorhabditis elegans]
K05F6.10	1362	172	80	11.1788	5.30105	-1.07642	Down	1.22121e-08	1.51734e-07	cdna:known chromosome:WBcel235:II:1574557:1576115:-1 gene:K05F6.10 gene_biotype:protein_coding transcript_biotype:protein_coding	-	-	-	-	gi|193204719|ref|NP_494000.2|/0/Protein K05F6.10 [Caenorhabditis elegans]
F54A5.1	1658	579	270	30.9128	14.697	-1.07269	Down	1.60554e-25	4.96521e-24	cdna:known chromosome:WBcel235:I:989671:992163:1 gene:F54A5.1 gene_biotype:protein_coding transcript_biotype:protein_coding	K08036	GO:0043231//intracellular membrane-bounded organelle	GO:0001071//nucleic acid binding transcription factor activity;GO:0003677//DNA binding	GO:0006351//transcription, DNA-dependent	gi|17507563|ref|NP_490803.1|/0/Protein HMBX-1 [Caenorhabditis elegans]
F55G1.15	1879	107	50	5.04082	2.40155	-1.06969	Down	8.06652e-06	7.17779e-05	cdna:known chromosome:WBcel235:IV:7498098:7501265:-1 gene:F55G1.15 gene_biotype:protein_coding transcript_biotype:protein_coding	-	-	GO:0005261//cation channel activity;GO:0046872//metal ion binding	GO:0006814//sodium ion transport	gi|392899448|ref|NP_501209.4|/0/Protein F55G1.15 [Caenorhabditis elegans]
T10B5.7	1012	866	405	75.7499	36.118	-1.06853	Down	3.90536e-37	1.65611e-35	cdna:known chromosome:WBcel235:V:1846201:1848015:1 gene:T10B5.7 gene_biotype:protein_coding transcript_biotype:protein_coding	-	GO:0031224//intrinsic to membrane	GO:0016298//lipase activity	GO:0044238//primary metabolic process	gi|17564186|ref|NP_503517.1|/4.31815e-180/Protein T10B5.7 [Caenorhabditis elegans]
F16C3.1	1227	109	51	7.86369	3.75124	-1.06784	Down	6.82986e-06	6.14318e-05	cdna:known chromosome:WBcel235:I:10147350:10149888:1 gene:F16C3.1 gene_biotype:protein_coding transcript_biotype:protein_coding	K04282	GO:0031224//intrinsic to membrane	GO:0004888//transmembrane signaling receptor activity	GO:0007166//cell surface receptor signaling pathway	gi|17506669|ref|NP_492672.1|/0/Protein F16C3.1 [Caenorhabditis elegans]
F47H4.12	4977	79	37	1.40509	0.670939	-1.06641	Down	0.000133409	0.000969898	cdna:pseudogene chromosome:WBcel235:V:17361541:17369294:1 gene:F47H4.12 gene_biotype:pseudogene transcript_biotype:pseudogene	K04;K10683	-	-	-	gi|309363788|emb|CAP25901.2|/5.15217e-174/Protein CBG05417 [Caenorhabditis briggsae]
Y6G8.2	2193	613	289	24.7438	11.8935	-1.0569	Down	2.54086e-26	8.0206e-25	cdna:known chromosome:WBcel235:V:17594349:17598930:-1 gene:Y6G8.2 gene_biotype:protein_coding transcript_biotype:protein_coding	-	-	-	-	gi|392922576|ref|NP_001256747.1|/0/Protein Y6G8.2, isoform a [Caenorhabditis elegans]
T12B3.3	1170	1972	933	149.199	71.9689	-1.05179	Down	2.85618e-80	2.3621e-78	cdna:known chromosome:WBcel235:IV:7375172:7376638:1 gene:T12B3.3 gene_biotype:protein_coding transcript_biotype:protein_coding	K01126;K01124	GO:0031224//intrinsic to membrane	GO:0008081//phosphoric diester hydrolase activity	GO:0019400	gi|17542344|ref|NP_501176.1|/0/Protein T12B3.3 [Caenorhabditis elegans]
F56H9.2	334	2594	1235	687.492	333.71	-1.04275	Down	1.5023e-103	1.56009e-101	cdna:known chromosome:WBcel235:V:12637661:12638238:1 gene:F56H9.2 gene_biotype:protein_coding transcript_biotype:protein_coding	-	-	-	-	gi|392921209|ref|NP_001256439.1|/2.01572e-24/Protein F56H9.2, isoform a [Caenorhabditis elegans]
F01G10.2	1384	532	254	34.0267	16.5633	-1.03868	Down	1.88154e-22	5.04976e-21	cdna:known chromosome:WBcel235:IV:10236629:10239114:-1 gene:F01G10.2 gene_biotype:protein_coding transcript_biotype:protein_coding	K00022;K07514	-	GO:0016616//oxidoreductase activity, acting on the CH-OH group of donors, NAD or NADP as acceptor;GO:0036094//small molecule binding;GO:0048037//cofactor binding	GO:0032787//monocarboxylic acid metabolic process	gi|71985923|ref|NP_501876.2|/0/Protein ECH-8 [Caenorhabditis elegans]
M01A8.1	966	159	76	14.5702	7.10044	-1.03704	Down	1.08419e-07	1.21794e-06	cdna:known chromosome:WBcel235:III:9257259:9260222:1 gene:M01A8.1 gene_biotype:protein_coding transcript_biotype:protein_coding	-	-	-	GO:0010876//lipid localization	gi|392896026|ref|NP_001254983.1|/2.44861e-97/Protein M01A8.1, isoform b [Caenorhabditis elegans]
Y75B8A.3	2719	305	146	9.92968	4.8461	-1.03492	Down	1.91628e-13	3.35799e-12	cdna:known chromosome:WBcel235:III:12101745:12106535:-1 gene:Y75B8A.3 gene_biotype:protein_coding transcript_biotype:protein_coding	K03927;K01044;K01049	-	-	-	gi|453232050|ref|NP_499576.4|/0/Protein Y75B8A.3 [Caenorhabditis elegans]
C17G10.7	889	104	50	10.3556	5.07595	-1.02866	Down	2.0306e-05	0.000170088	cdna:known chromosome:WBcel235:II:5606543:5607858:-1 gene:C17G10.7 gene_biotype:protein_coding transcript_biotype:protein_coding	-	-	-	GO:0010876//lipid localization	gi|17531947|ref|NP_495090.1|/1.88783e-109/Protein C17G10.7 [Caenorhabditis elegans]
K05F6.11	1139	108	52	8.39353	4.1203	-1.02653	Down	1.45134e-05	0.000124536	cdna:known chromosome:WBcel235:II:1540928:1542718:1 gene:K05F6.11 gene_biotype:protein_coding transcript_biotype:protein_coding	K01045	GO:0031224//intrinsic to membrane	GO:0052689	GO:0010876//lipid localization	gi|212645472|ref|NP_001040790.2|/0/Protein POML-4 [Caenorhabditis elegans]
Y53F4B.32	696	118	57	15.0078	7.39119	-1.02183	Down	6.27976e-06	5.66791e-05	cdna:known chromosome:WBcel235:II:15168538:15169860:-1 gene:Y53F4B.32 gene_biotype:protein_coding transcript_biotype:protein_coding	K08;K00799;K01830	-	GO:0005488//binding	-	gi|17537491|ref|NP_497118.1|/1.00242e-116/Protein GST-29 [Caenorhabditis elegans]
F21C10.10	1040	3968	1918	337.74	166.442	-1.02089	Down	4.71114e-152	7.23576e-150	cdna:known chromosome:WBcel235:V:9096267:9097224:1 gene:F21C10.10 gene_biotype:protein_coding transcript_biotype:protein_coding	-	GO:0043231//intracellular membrane-bounded organelle	GO:0003824//catalytic activity;GO:0036094//small molecule binding	GO:0032787//monocarboxylic acid metabolic process	gi|25150102|ref|NP_505359.2|/4.01482e-112/Protein F21C10.10 [Caenorhabditis elegans]
F09F7.6	365	804	389	194.988	96.1846	-1.01951	Down	3.68332e-32	1.40543e-30	cdna:known chromosome:WBcel235:III:5551221:5552115:-1 gene:F09F7.6 gene_biotype:protein_coding transcript_biotype:protein_coding	-	-	-	-	gi|17552970|ref|NP_498189.1|/4.36819e-35/Protein F09F7.6 [Caenorhabditis elegans]
F43C11.7	934	755	366	71.5557	35.3658	-1.01671	Down	3.5888e-30	1.29629e-28	cdna:known chromosome:WBcel235:II:2335933:2337694:1 gene:F43C11.7 gene_biotype:protein_coding transcript_biotype:protein_coding	K11997;K07963	-	GO:0046914//transition metal ion binding	-	gi|17533953|ref|NP_494245.1|/6.09945e-170/Protein F43C11.7 [Caenorhabditis elegans]
K06B4.11	1098	107	52	8.62633	4.27415	-1.01311	Down	1.96156e-05	0.000165214	cdna:known chromosome:WBcel235:V:15700664:15702362:-1 gene:K06B4.11 gene_biotype:protein_coding transcript_biotype:protein_coding	K08;K08704;K07292	GO:0043231//intracellular membrane-bounded organelle	GO:0001071//nucleic acid binding transcription factor activity;GO:0003677//DNA binding;GO:0038023//signaling receptor activity;GO:0046914//transition metal ion binding	GO:0006351//transcription, DNA-dependent;GO:0009755//hormone-mediated signaling pathway;GO:0010876//lipid localization	gi|10198025|gb|AAG15147.1|/0/nuclear receptor NHR-53 [Caenorhabditis elegans]
Y54G2A.9	1300	374	182	25.4667	12.635	-1.01118	Down	1.32556e-15	2.72522e-14	cdna:known chromosome:WBcel235:IV:2825154:2828065:1 gene:Y54G2A.9 gene_biotype:protein_coding transcript_biotype:protein_coding	K06560	-	-	-	gi|17543580|ref|NP_500257.1|/9.10298e-171/Protein CLEC-81 [Caenorhabditis elegans]
T01B10.4	1850	778	380	37.2265	18.5379	-1.00585	Down	1.58989e-30	5.81167e-29	cdna:known chromosome:WBcel235:X:8473736:8476176:-1 gene:T01B10.4 gene_biotype:protein_coding transcript_biotype:protein_coding	K08037;K08704;K07292	GO:0043231//intracellular membrane-bounded organelle	GO:0001071//nucleic acid binding transcription factor activity;GO:0003677//DNA binding;GO:0038023//signaling receptor activity;GO:0046914//transition metal ion binding	GO:0006351//transcription, DNA-dependent;GO:0009755//hormone-mediated signaling pathway;GO:0010259//multicellular organismal aging	gi|71995375|ref|NP_741861.2|/0/Protein NHR-14, isoform b [Caenorhabditis elegans]
Y6E2A.4	1641	178	87	9.60187	4.78475	-1.00487	Down	4.29472e-08	5.03816e-07	cdna:known chromosome:WBcel235:V:15712206:15715644:-1 gene:Y6E2A.4 gene_biotype:protein_coding transcript_biotype:protein_coding	-	-	-	-	gi|193209213|ref|NP_506910.3|/0/Protein Y6E2A.4 [Caenorhabditis elegans]
